37 <sup>15</sup> Department of Plant and Microbial Biology, University of California Berkeley, Berkeley, CA 94720

38 USA

39 \*contributed equally to this study

40 +to whom correspondence should be addressed: [dorrell@bio.ens.psl.eu](mailto:dorrell@bio.ens.psl.eu),

41 [Connie.Lovejoy@bio.ulaval.ca](mailto:Connie.Lovejoy@bio.ulaval.ca)

42

43

44 **Abstract**

45 **The Arctic Ocean is being impacted by warming temperatures, increasing freshwater and highly**  
46 **variable ice conditions. The microalgal communities underpinning Arctic marine food webs, once**  
47 **thought to be dominated by diatoms, include a phylogenetically diverse range of small algal**  
48 **species, whose biology remains poorly understood. Here, we present genome sequences of a**  
49 **cryptomonad, a haptophyte, a chrysophyte, and a pelagophyte, isolated from the Arctic water**  
50 **column and ice. Comparing protein family distributions and sequence similarity across a densely-**  
51 **sampled set of algal genomes and transcriptomes, we note striking convergences in the biology of**  
52 **distantly related small Arctic algae, compared to non-Arctic relatives; although this convergence is**  
53 **largely exclusive of Arctic diatoms. Using high-throughput phylogenetic approaches, incorporating**  
54 **environmental sequence data from *Tara* Oceans, we demonstrate that this convergence was partly**  
55 **explained by horizontal gene transfers (HGT) between Arctic species, in over at least 30 other**  
56 **discrete gene families, and most notably in ice-binding domains (IBD). These Arctic-specific genes**  
57 **have been repeatedly transferred between Arctic algae, and are independent of equivalent HGTs**  
58 **in the Antarctic Southern Ocean. Our data provide insights into the specialized Arctic marine**  
59 **microbiome, and underlines the role of geographically-limited HGT as a driver of environmental**  
60 **adaptation in eukaryotic algae.**

61 **Keywords: Baffin Bay/ Pikialasorsuaq; pico-phytoplankton; PF11999 domain/ ice-binding proteins;**  
62 **secreted proteins; polar adaptations; environmentally-resolved phylogenetics.**

63

64

## 65 Introduction

66 Four global marine biomes have been defined based on temperature, salinity and mixing  
67 regimes (Longhurst, 2006). The polar biome is characterized by year-round near freezing  
68 temperatures making polar oceans salinity- rather than temperature-stratified (Carmack, 2007). The  
69 Arctic Ocean stands apart from the Antarctic Southern Ocean through its greater geographical  
70 isolation (Beszczynska-Moller, Woodgate, Lee, Melling, & Karcher, 2011) and having fresher surface  
71 waters due to the inflow from large rivers. This added freshwater isolates the upper photic zone from  
72 saltier deep waters, and seasonal freezing renders the entire Arctic Basin an ice-influenced  
73 ecosystem.

74 The marine Arctic food web is supported by photosynthetic activity, performed by microalgae  
75 inhabiting both the water column (phytoplankton) and sea ice (sea-ice algae). These algae are  
76 phylogenetically diverse, including green algae, cryptomonads, haptophytes, dinoflagellates and  
77 ochrophytes (e.g., diatoms, pelagophytes and chrysophytes) (Fig. 1) (Dorrell et al., 2021a; Li,  
78 McLaughlin, Lovejoy, & Carmack, 2009). The lineages that comprise these algae split from one  
79 another hundreds of millions of years in the past and have acquired photosynthetic capacity through  
80 multiple chloroplast endosymbiotic events (Dorrell et al., 2021a; Strassert, Irisarri, Williams, & Burki,  
81 2021).

82 Arctic-isolated algae show distinct physiological properties, in particular having viable growth  
83 temperatures that are far below those of relatives isolated from lower latitudes (Fig. 1- Figure  
84 Supplement 1) (Lovejoy et al., 2007). Different Arctic microalgae proliferate in different niches, from  
85 cold open water to ice, including microhabitats with variable salinity during ice formation and  
86 melting. During the early spring, high concentrations of nutrients in the Arctic Ocean surface  
87 facilitate diatom growth (Leu et al., 2015; Li et al., 2009; Lovejoy et al., 2007). However, from the late  
88 spring onwards, freshwater from river runoff and ice melt enforce vertical stratification of the Arctic  
89 Ocean, keeping inorganic nutrients below the photic zone. Low nutrient conditions favour smaller  
90 species with high surface-to-volume ratios and photo-mixotrophic life strategies (Bock et al., 2021;  
91 Jeong et al., 2021; Lie et al., 2018; McKie-Krisberg & Sanders, 2014). Ice-dwelling species are also  
92 exposed to salinity fluctuations, nutrient pulses and depletion, and have the ability to maintain viable  
93 cells during ice-free periods. Defining the genetic adaptations underpinning these small algal species  
94 is crucial as a baseline to understand their response to anthropogenic global change (Notz & Stroeve,  
95 2016).

96 A small number of algal genomes has been previously assembled from polar biomes, including the  
97 Antarctic diatom *Fragilariopsis cylindrus*, the Antarctic chlorophytes *Chlamydomonas* sp. ICE-L and  
98 sp. UWO241, and the dinoflagellate *Polarella glacialis* (Mock et al., 2017; Stephens et al., 2020; X.  
99 Zhang, Cvetkovska, Morgan-Kiss, Hüner, & Smith, 2021; Z. Zhang et al., 2020). These libraries have  
100 yielded insights into the adaptation of algae to high latitudes, including genes encoding ice-binding  
101 proteins (IBPs) that facilitate tolerance to freezing conditions, and that have been acquired via  
102 horizontal transfers from cold-adapted bacteria (Mock et al., 2017; Raymond, 2011; Raymond & Kim,  
103 2012; X. Zhang et al., 2021; Z. Zhang et al., 2020). We extend these insights by sequencing the  
104 genomes of four distantly related microalgae isolated from the Pikialasorsuaq/ Northwater Polynyna  
105 of the Arctic Ocean (Egeesiak, Aariak, & Kleist, 2017). Comparing these libraries to sequenced algal  
106 genomes (Grigoriev et al., 2021) and transcriptomes from the Marine Microbial Eukaryote

107 Transcriptome Sequencing Project (MMETSP) (Keeling et al., 2014), we reveal remarkable  
108 convergence in the coding content of these and other distantly related small Arctic algae. We further  
109 demonstrate, using genome-wide phylogenetic approaches (Dorrell et al., 2021a; Stiller et al., 2014)  
110 and environmental sequence data including *Tara* Oceans (Carradec et al., 2018; Ibarbalz et al., 2019;  
111 Pesant et al., 2015), that this is partly driven by horizontal gene transfers (HGT) between Arctic algal  
112 species. Our data reveal innovations underpinning an Arctic algal “metapan-genome”; and reposition  
113 our understanding of HGT as an effector of environmental adaptation that may even be restricted by  
114 geographic boundaries.

## 115 **Results**

### 116 *New genome sequences from Arctic-isolated algae*

117 To improve our understanding of Arctic algal evolution and adaptive diversity, genomes were  
118 sequenced from four species isolated from latitudes > 75° N. The four species are distantly related to  
119 each other (Fig. 1): *Baffinella* sp. CCMP2293, a cryptomonad, and Pavlova sp. CCMP2436, a  
120 haptophyte, from pelagic environments; *Ochromonas* sp. CCMP2298, a chrysophyte from sea ice;  
121 and a novel pelagophyte species CCMP2097 from a brine pocket on the sea ice surface (Table S1,  
122 sheet 1) (Hamilton, Lovejoy, Galand, & Ingram, 2008; Terrado, Monier, Edgar, & Lovejoy, 2015). All  
123 four species have been demonstrated to grow optimally at low temperatures (<6 °C; Fig. 1- Figure  
124 Supplement 1) (Keeling et al., 2014; Lovejoy et al., 2007; Terrado et al., 2015).

125 Phylogenetic contexts of the sequenced Arctic algae were assessed through a concatenated tree of  
126 250 conserved single-copy nuclear genes (39,504 aa) for 391 taxa from across the eukaryotic tree of  
127 life (Fig. 1; Table S1, Sheets 2-3) (Burki et al., 2016), alongside densely sampled single-gene trees of  
128 nuclear 18S and plastid 16S rDNA (Fig. 1- Figure Supplements 2-5; Table S1, Sheets 4-7). *Baffinella* sp.  
129 CCMP2293 was resolved in an 18S analysis to a well-supported clade containing the conspecific  
130 Arctic cryptomonad *Baffinella frigidus* CCMP2045 (Fig. 1- Figure Supplement 2; (Daugbjerg, Norlin, &  
131 Lovejoy, 2018)), whereas the novel pelagophyte CCMP2097 was placed in 18S and 16S analyses near  
132 Arctic environmental isolates and members of the genus *Ankylochrysis* (Fig. 1- Figure Supplement 3)  
133 (Han et al., 2018); both were distant to other polar species with sequenced genomes or  
134 transcriptomes (Fig. 1). Pavlova sp. CCMP2436 was placed, in all three analyses, at the base of the  
135 clade that includes the otherwise non-polar genus *Diacronema* (Bendif et al., 2011) (Fig. 1- Figure  
136 Supplement 4), while *Ochromonas* sp. CCMP2298 was found in the 18S and multigene analysis to be  
137 most closely related to the temperate species *Ochromonas* sp. CCMP1393 (Fig. 1; Fig. 1- Figure  
138 Supplement 5) (Keeling et al., 2014; Lie et al., 2018).

139 Next, geographical distributions were calculated for 18S (V4 and V9 variable regions) and 16S (V4V5  
140 regions) ribotypes from the *Tara* Oceans (including Polar Circle) Expeditions that were  
141 phylogenetically reconciled to each sequenced Arctic isolate (de Vargas et al., 2015; Ibarbalz et al.,  
142 2019; Sunagawa et al., 2015) (Fig. 2; Table S1, sheets 8-11). All four species were most frequently  
143 identified in surface water samples and 3 or 5 to 20 µm size fractions (Fig. 2- Figure Supplement 1).  
144 *Baffinella* sp. CCMP2293 and the novel pelagophyte CCMP2097 were relatively abundant, with >  
145 10,000 total mapped ribotypes across all samples and size fractions, the majority of which were from  
146 Arctic Ocean stations (Fig. 2; Fig. 2- Figure Supplement 2 panels A, B). Pavlova sp. CCMP2436 and  
147 *Ochromonas* sp. CCMP2298 were much rarer, with *Ochromonas* sp. CCMP2298 only detected in 16S  
148 V4-V5 ribotypes; and both were exclusively located in the Arctic (Fig. 2; Fig. 2- Figure Supplement 2

149 panels C, D). The relative abundances of all four species were negatively associated with temperature  
150 (Spearman  $f$ -test,  $P < 0.05$ ) specifically in Northern hemisphere stations (Fig. 2- Figure Supplement 3;  
151 Table S1, sheet 12), suggesting cold-adaptation and predominant restriction to the Arctic. Similar  
152 results were obtained for 0.8-2000  $\mu\text{m}$  size fraction samples, albeit with some presence of relatives  
153 of *Baffinella* sp. CCMP2293 and the novel pelagophyte CCMP2097 outside of the Arctic (Fig. 2- Figure  
154 Supplement 2 panels A, B).

#### 155 *Arctic algae possess expanded genomes with distinct composition*

156 Possible genomic trends underpinning the biology of Arctic algal species were inferred across a  
157 dataset of 24 sequenced algal genomes (Grigoriev et al., 2021) and 296 MMETSP transcriptomes  
158 (Keeling et al., 2014) from eight groups (chlorophytes, chrysophyte-related species, cryptomonads,  
159 diatoms, dictyochophytes, dinoflagellates, haptophytes and pelagophytes) with at least one  
160 sequenced Arctic species, henceforth referred to as the “pan-algal dataset” (Table S1, sheet 2). The  
161 Arctic algal genomes were typically larger than sequenced non-Arctic relatives: most dramatically,  
162 the *Baffinella* sp. CCMP2293 genome (534.5 Mbp total content) is 6.13 times that of the non-Arctic  
163 cryptomonad *Guillardia theta* (87.2 Mbp; Table S2, sheet 1) (Curtis et al., 2012), although more  
164 moderate expansions (between 1.17 and 2.11 times the size of nearest sequenced relatives in the  
165 dataset) were observed for other Arctic algae. A broader analysis of the pan-algal dataset (Table S2,  
166 sheets 2, 3) revealed higher ratios of genes to PFAM protein domains (i.e., suggesting an expansion in  
167 genes without known PFAM functions), in Arctic than non-polar sequence libraries. This enrichment  
168 was statistically significant (one-way ANOVA,  $P < 0.05$ ) for Arctic cryptomonads and chrysophytes  
169 compared to non-Arctic relatives (Table S2, sheet 3).

170 The Arctic species within the pan-algal dataset encoded greater proportions of small hydrophobic  
171 residues (alanine, glycine, and valine, one-way ANOVA,  $P = 0.013$ ), and smaller proportions of charged  
172 residues (aspartate, glutamate, lysine and arginine,  $P = 0.032$ ) than non-Arctic species (Table S2,  
173 sheets 4, 5). The enrichment in small hydrophobic residues was further found specifically in Arctic  
174 chrysophytes and pelagophytes compared to non-polar relatives ( $P < 0.05$ ; Table S2, sheet 5).  
175 Genome expansions have previously been identified in psychrophilic prokaryotes (Royo-Llonch et al.,  
176 2020) and eukaryotes (X. Zhang et al., 2021; Z. Zhang et al., 2020); as have expansions in hydrophobic  
177 residues in cold-adapted bacteria (Metpally & Reddy, 2009) and freshwater eukaryotic algae (Nelson  
178 et al., 2021) suggesting possible adaptive features to the cold, fresher Arctic waters.

#### 179 *Convergence in protein domain content between distantly related small Arctic algae*

180 Next, we considered the global similarity of Arctic algal genomes and transcriptomes to one another,  
181 considering PFAM domain distributions as a proxy (Fig. 3;(Mistry et al., 2020)). Phylogenetically-  
182 aware principal component analyses (phylPCA) of genomes (Fig. 3- Figure Supplement 1i) and  
183 transcriptomes (Fig. 3- Figure Supplement 1ii) revealed clusters of some Arctic species (e.g.,  
184 Pavlova sp. CCMP2436, the novel pelagophyte CCMP2097, and *Ochromonas* sp. CCMP2298), albeit  
185 with others (e.g., *Baffinella* sp. CCMP2293) forming outliers. To determine if Arctic species have  
186 converged on similar PFAM contents, pairwise Bray-Curtis indices were calculated between the  
187 PFAM distributions across the pan-algal dataset, considering genome and transcriptome libraries  
188 separately (Fig. 3- Figure Supplement 2; Table S2, sheets 6, 8-10) (Anderson et al., 2016; Horn et al.,  
189 2016; Nelson et al., 2021). To avoid artifacts caused by differences in phylogenetic proximity, species  
190 from the same taxonomic group were excluded (Fig. 3- Figure Supplement 2) prior to calculating

191 mean Bray-Curtis values between pairs of libraries from different habitats (either: Arctic, Antarctic/  
192 Southern Ocean, or “Other” for non-polar species).

193 Pairs of Arctic species showed greater mean similarity in PFAM content (genome mean 0.663;  
194 transcriptome mean 0.596) than pairs of Arctic and non-polar species (genome mean 0.541;  
195 transcriptome mean 0.556); or pairs of non-polar species did to one another (genome mean 0.551;  
196 transcriptome mean 0.512; Fig. 3). The mean Bray-Curtis value observed between Arctic species pairs  
197 was significantly greater than that observed between pairs of Arctic and non-Arctic species (one-way  
198 ANOVA, genomes  $P = 6 \times 10^{-05}$ ; transcriptomes  $P = 0.002$ ); and between pairs of non-Arctic species  
199 (genomes  $P = 0.01$ ; transcriptomes  $P = 0$ ; Fig. 3). Greater similarity was noted between pairs of Arctic  
200 species than between Arctic and Antarctic species (e.g., *Fragilariopsis cylindrus*) (Mock et al., 2017) in  
201 both genomes (mean = 0.527,  $P = 0.0047$ ) and transcriptomes data (mean 0.569;  $P = 0.049$ ),  
202 indicating that this convergence is specific to the Arctic Ocean (Fig. 3). Statistically significant  
203 convergences were also observed between Arctic genomes considering the BUSCO-adjusted number  
204 of PFAMs shared between each library, suggesting it was independent of the completeness of Arctic  
205 and non-Arctic libraries in the pan-algal dataset (Fig. 3- Figure Supplement 3A); and from the  
206 Spearman rank index of PFAMs in the transcriptomes dataset (34) (Choi & Kim, 2007), indicating that  
207 this was not due solely to expansions in Arctic algal PFAM contents (Fig. 3- Figure Supplement 3B).

208 Convergences involved diverse species, with Pavlova sp. CCMP2436 having greater convergence to  
209 the novel pelagophyte CCMP2097; and Arctic chlorophytes and dinoflagellates likewise having  
210 greater convergence to one another than to non-Arctic equivalents, for all metrics tested (Fig. 3-  
211 Figure Supplement 4; Table S2, Sheet 10). Exclusion of diatoms from the PFAM dataset indeed  
212 strengthened the separation between Arctic-Arctic species pairs and other biogeographical  
213 categories of species pairs in Bray-Curtis, BUSCO-corrected Bray-Curtis, and Spearman correlation  
214 calculations (Fig. 3- Figure Supplement 5; Table S2, sheet 10). This may point to separate trends in  
215 PFAM content between Arctic diatoms, and smaller size fraction picophytoplankton in the Arctic.

#### 216 *Arctic-associated PFAMs are spread by within-Arctic horizontal gene transfer*

217 Next, we determined which PFAMs were principally responsible for the convergence in PFAM  
218 content amongst Arctic algae (Fig. 4). We considered both occurrence in Arctic species (Table S2,  
219 sheet 6) and expansions or contractions in copy number in Arctic species compared to their closest  
220 non-Arctic relatives (Table S3, sheet 1) (X. Zhang et al., 2021), performed through a phylogenetically-  
221 calibrated CAFE (Computational Analysis of gene Family Evolution) across the pan-algal dataset (De  
222 Bie, Cristianini, Demuth, & Hahn, 2006). Multiple PFAM domains were more frequently detected, or  
223 more frequently underwent expansions (two-tailed chi-squared  $P < 10^{-05}$ ) in Arctic species within the  
224 dataset (Fig. 4; Table S3, sheet 2), with exemplar distributions of eight such PFAMs shown in Fig. 4-  
225 Figure Supplement 1.

226 The most highly Arctic-associated PFAM domain, both considering presence and expansion  
227 frequencies ( $P < 10^{-25}$ ), was PF11999 (Figs. 4, 5), encoding ice-binding domains (Raymond, 2011;  
228 Raymond & Kim, 2012; Vance, Bayer-Giraldi, Davies, & Mangiagalli, 2019). Ice-binding domains,  
229 which typically complex with water through six threonine-rich domains within a larger hydrophobic  
230 manifold, play key roles in cryotolerance, variously allowing cold-adapted species to avoid osmolysis  
231 during freezing transitions within the cell, or allowing membrane surface transporters to be kept  
232 open, or even adhesion of cells to the ice surface if secreted (Raymond, 2011; Raymond & Kim, 2012;

233 Vance et al., 2019). Ice-binding domains were accordingly detected in the overwhelming majority of  
234 the Arctic species in the dataset, with the greatest number (100 annotated in the transcriptome; 40  
235 in the genome) in Pavlova sp. CCMP2436 (Fig. 4- Figure Supplement 1). A broader analysis of  
236 environmental sequences containing a predicted PF11999 domain from *Tara* Oceans (Carradec et al.,  
237 2018) confirmed a strong polar signature (Fig. 5- Figure Supplement 1; Table S3, sheet 3). Nearly all  
238 of the individual *Tara* Oceans genes showed either exclusively Arctic or exclusively Antarctic  
239 distributions, with only thirty (out of 1,607 total sequences) found at intermediate latitudes, and only  
240 four distributed in both poles (Table S3, sheets 3, 6).

241 To investigate the evolutionary history underpinning the differential enrichment of ice-binding  
242 domains in Arctic species, we constructed a 4,862 branch tree of ice-binding domains, from all 4  
243 query genomes, all 317 genomes and transcriptomes in the pan-algal dataset, all of UniRef (Suzek,  
244 Huang, McGarvey, Mazumder, & Wu, 2007), and all sequences from *Tara* Oceans; labelling each  
245 sequence by the phylogenetic origin of the underlying species and, where known, the geographical  
246 location (Fig. 5; Table S3, sheets 3, 7). The tree topology of ice-binding sequences did not match the  
247 underlying species phylogenies, but was separated in predominantly Arctic- and Antarctic-clades;  
248 consistent with within-ocean HGT (Fig. 5). “Arctic clade A” contains the dinoflagellate *Heterocapsa*  
249 *arctica*; followed by the distantly related dinoflagellate *Polarella glacialis* (Dorrell et al., 2017;  
250 Stephens et al., 2020). Of note, *P. glacialis* contains both Arctic (CCMP2088) and Antarctic  
251 (CCMP1383) isolated strains, which resolve as sister-groups (with multiple direct orthologues,  
252 (Stephens et al., 2020)). The position of both strains within an otherwise Arctic-isolated clade within  
253 the tree thus implies that *P. glacialis* was ancestrally present in the Arctic and that CCMP1383  
254 subsequently arrived in the Antarctic (Stephens et al., 2020). Arctic clade A further contains, in  
255 probable order of acquisition: the novel pelagophyte CCMP2097; Pavlova sp. CCMP2436;  
256 *Baffinella* sp. CCMP2293; and finally dinoflagellates within the *Scrippsiella hangoei*/*Peridinium*  
257 *aciculiferum* species complex, which are distant from *H. arctica* or *P. glacialis* and have freshwater  
258 Arctic distributions (Craveiro, Daugbjerg, Moestrup, & Calado, 2017; Dorrell et al., 2017; Keeling et  
259 al., 2014). Similarly, Clade B contained putative transfers between *Ochromonas* sp. CCMP2298, the  
260 boreal freshwater non-photosynthetic chrysophyte *Pedospumella encystans* (Beisser et al., 2017;  
261 Dorrell et al., 2019; Grossmann, Bock, Schweikert, & Boenigk, 2016) and an Arctic dictyochophyte,  
262 CCMP2098 (Terrado et al., 2015); Clade C consisted of transfers between the Arctic dictyochophyte  
263 CCMP2098 and the chlorophyte *Pyramimonas* sp. CCMP2087 (Lovejoy et al., 2007); and Clade D  
264 consisted of HGT between Pavlova sp. CCMP2436, the Arctic chlorophyte *Micromonas* sp.  
265 CCMP2099, and multiple Arctic *Tara* Oceans sequences (clade D) (Lovejoy et al., 2007; McKie-  
266 Krisberg & Sanders, 2014). Finally, two Antarctic-specific clades indicate parallel horizontal transfers  
267 of ice-binding proteins within Antarctic algae, specifically between the haptophyte *Phaeocystis*  
268 *antarctica* and multiple diatoms including *Fragilariopsis cylindrus* (Gast, Moran, Dennett, & Caron,  
269 2007; Keeling et al., 2014; Mock et al., 2017), with Antarctic bacteria as a probable outgroup  
270 (Brinkmeyer et al., 2003; Muñoz-Villagrán et al., 2018) (clade 1), and between the cryptomonad  
271 *Geminigera cryophila*, the chlorophyte *Mantoniella antarctica* and the Antarctic fungi *Glaciozyma*  
272 *antarctica* and *Leucosporidium* sp. AY30 (Lovejoy et al., 2007; Turchetti et al., 2011) (clade 2).

273 The topology of the IBD tree was corroborated by an internal BLAST search of the alignment to itself  
274 (Table S3, sheets 3, 8, 9), which demonstrated that (excluding hits to congeneric species, and to  
275 environmental sequence isolates) Antarctic and Arctic species typically retrieved best-scoring hits to  
276 other algae from the same oceanic region (Fig. 5- Figure Supplement 2). These included enrichments



277 in reciprocal hits between *Heterocapsa arctica*, *Baffinella* sp. CCMP2293 and Pavlovales sp.  
278 CCMP2436 (Arctic clade A); *Pedospumella encystans*, *Ochromonas* sp. CCMP2298 and the  
279 dictyochophyte CCMP2098 (Arctic clade B); and *Mantoniella antarctica* and *Geminigera cryophila*  
280 (Antarctic clade 2).

281 Several additional PFAMs were significantly enriched in Arctic species (Fig. 4; Fig. 4- Figure  
282 Supplement 1). These included PF03988/ DUF347, which is likely to encode an efflux transporter  
283 implicated in metal stress responses in the diatom *Thalassiosira pseudonana* (Davis, Hildebrand, &  
284 Palenik, 2006) and the boreal actinomycete *Frankia* (Furnholm & Tisa, 2014), and previously shown  
285 to be expanded in *Scrippsiella hangoei* (Stephens, Ragan, Bhattacharya, & Chan, 2018). A second  
286 example was PF03831 (PhnA, YjdM), which functions as an uptake protein or inducer involved in  
287 alkyl-phosphonate metabolism (Chetouani, Glaser, & Kunst, 2001; Kulakova et al., 2001), and was  
288 previously shown to be expanded in bacteria from the phycosphere of Antarctic seaweeds (Cid et al.,  
289 2018). Phylogenetically and biogeographically-resolved analyses of each PFAM, using *Tara* Oceans-  
290 enriched datasets (Table S3, sheets 4-7), revealed probable HGTs between Pavlovales sp. CCMP2436  
291 and *Scrippsiella hangoei* in the PF03988/ DUF347 tree (Fig. 5- Figure Supplement 3); and between the  
292 novel pelagophyte CCMP2097 and the Arctic dictyochophyte CCMP2098 in the PF03831/ PhnA  
293 domain tree (Fig. 5- Figure Supplement 4).

#### 294 *Widespread occurrence of within-Arctic HGT across Arctic algal genomes*

295 Next, we investigated the probable frequency of within-Arctic HGT across all available genomes of  
296 Arctic algae (Fig. 6). We adapted a protocol from previous studies based on LASTal analysis (Kiełbasa,  
297 Wan, Sato, Horton, & Frith, 2011) and linear regression (Dorrell et al., 2019; Metpally & Reddy, 2009;  
298 Stiller et al., 2014) (Fig. 6- Figure Supplement 1; Table S4, sheet 2). This involved searching two  
299 genomes from a given algal group, one Arctic and the other non-Arctic (a “comparative pair”) against  
300 a mixed library of Arctic and non-Arctic genomes and transcriptomes from another algal group (Fig.  
301 6- Figure Supplement 1A). As both members of the comparative pair are of equivalent phylogenetic  
302 distance to all species within the reference library, the number of LAST best hits obtained from the  
303 Arctic and non-Arctic queries for each reference should be correlated, with deviations indicating  
304 convergences (e.g., HGT with the query species) (Fig. 6- Figure Supplement 1B).

305 Deviations for multiple comparative pairs of Arctic and non-Arctic species were calculated for each  
306 species in the pan-algal dataset (Fig. 6). The five species that showed the greatest positive deviations  
307 in favour of Arctic queries (mean residual > 40, median residual > 30) were themselves small Arctic  
308 algae (the dictyochophyte CCMP2098, *Baffinella* sp. CCMP2293, *Pyramimonas* sp. CCMP2087, the  
309 pelagophyte CCMP2097, and *Ochromonas* sp. CCMP2298; Fig. 6). A further five Arctic species  
310 showed smaller but significant ( $\chi^2$  P < 0.05) enrichments in Arctic best hits, of which only  
311 one (*Entomoneis* sp.) was a diatom; whereas non-Arctic (including Antarctic) algae within the  
312 reference dataset showed smaller deviations (Fig. 6; Table S4, sheet 3).

313 To explicitly recover additional within-Arctic HGTs, we used genes from each sequenced Arctic  
314 genome that produced LAST best hits involving other Arctic algal species, as seed proteins for the  
315 generation of manually curated trees (Table S4, sheets 4; Fig. 6- Figure Supplement 2). Each tree was  
316 enriched with the best homologues of the query sequence from all 317 algal genomes and  
317 transcriptomes in the pan-algal dataset, a further 82 reference prokaryotic and eukaryotic genomes  
318 sampled for taxonomic representation and the inclusion of polar isolated species, and from a

319 previously assembled dataset of 151 combined genome and transcriptome libraries covering the  
320 entire tree of life; i.e., up to 559 total homologues (Table S4, sheet 5) (Dorrell et al., 2019; Dorrell et  
321 al., 2021a).

322 Following manual curation (Table S4, sheets 6-8), 34 gene clusters were identified that supported  
323 within-Arctic HGTs (RAxML threshold bootstrap support 50%; Fig. 6- Figure Supplement 3; Table S4,  
324 sheet 9), including a well-supported ice-binding protein clade probably corresponding to “Arctic  
325 clade A” in the global IBD phylogeny (Fig. 4). Although a diverse range of Arctic species were  
326 detected in the within-Arctic HGT clades, including all four query genomes, the dictyochophyte  
327 CCMP2098, *Pyramimonas* sp. CCMP2087 and multiple Arctic dinoflagellates (*Heterocapsa*,  
328 *Scrippsiella*, *Peridinium* sp.), not one tree resolved HGTs between the four query species and Arctic  
329 diatoms (Table S4, sheet 9).

330 Several of the genes inferred to have been horizontally transferred between Arctic algae correspond  
331 to proteins which may carry out Arctic-adaptive functions (Table S4, sheet 9). These include an  
332 alcohol dehydrogenase and a CCCH Zn-finger PFAM domain shared between *Baffinella* sp.  
333 CCMP2293, Pavlova sp. CCMP2436 and the novel pelagophyte CCMP2097, which are implicated in  
334 cold and salinity stress responses in *Arabidopsis* (Song, Liu, & Ma, 2019; Y. Wang et al., 2017); and a  
335 tellurite resistance protein, which was shared between *Baffinella* sp. CCMP2293 and *Ochromonas* sp.  
336 CCMP2298 and has been previously detected in polar bacteria (Muñoz-Villagrán et al., 2018). The  
337 within-Arctic HGT genes were significantly enriched ( $\chi^2$  P <  $10^{-05}$ ) in signal peptides,  
338 consistent with endomembrane or secretory localisations, compared to other genes in the query  
339 genomes (Table 1; Fig. 6- Figure Supplement 4; Table S4, sheet 9); as has been noted in other meta-  
340 analyses of HGT in non-Arctic eukaryotic microbes (Dorrell et al., 2021a; Eme, Gentekaki, Curtis,  
341 Archibald, & Roger, 2017; Irwin, Pittis, Richards, & Keeling, 2021). Finally, considering homologues in  
342 *Tara* Oceans data, five gene families were identified in which all *Tara* Oceans genes phylogenetically  
343 reconciled to the within-Arctic HGT clade had exclusively Arctic distributions, and a further seven in  
344 which a majority of the phylogenetically reconciled *Tara* Oceans unigenes were exclusively Arctic  
345 (Fig. 6- Figure Supplement 5; Table S4, sheets 10-11); confirming their probable Arctic-specific  
346 functions.

## 347 Discussion

348 We have harnessed newly sequenced genomes alongside a densely sampled dataset of genomes and  
349 transcriptomes, as well as environmental data from *Tara* Oceans to unveil evolutionary trends in  
350 algae isolated from the Arctic Ocean. Our data suggests convergence in the coding content of diverse  
351 small Arctic algae, linked to the presence of Arctic-specific genes, although with the exclusion of  
352 Arctic diatoms. We further show that within-Arctic HGT, exemplified by genes coding for ice-binding  
353 domains, is an important component of this convergent evolution. The overall results position  
354 within-ocean HGT as a mechanism of environmental adaptation, which may occur via biotic  
355 interactions characteristic of Arctic species such as photo-mixotrophy (McKie-Krisberg & Sanders,  
356 2014; Sjøgaard et al., 2021) and viral infection (Irwin et al., 2021; Nelson et al., 2021); or even the  
357 direct exchange of genetic material through the Arctic water column or sea ice (Raymond, 2011;  
358 Raymond & Kim, 2012).

359 It remains to be determined whether within-Arctic convergences in sequenced species, which were  
360 predominantly sampled from Baffin Bay, extend to other regions within the Arctic Ocean, and algal

361 groups. Deeper sequencing of Arctic species, either from cultured isolates, or from Arctic-specific  
362 Metagenome Assembled Genomes (Cao et al., 2020; Vorobev et al., 2020), will be instrumental in  
363 determining their broader genomic diversity. In particular, deeper sequencing of Arctic diatoms will  
364 be instrumental to understanding their different coding contents to small algal species, which may  
365 underpin their different relative seasonal niches in the Arctic (Joli, Monier, Logares, & Lovejoy, 2017;  
366 Li et al., 2009), and particularly considering the large numbers of diatom-specific HGT events  
367 visualised in previous phylogenomic studies of pan-algal HGTs (Dorrell et al., 2021a; Vancaester,  
368 Depuydt, Osuna-Cruz, & Vandepoele, 2020). Moreover, the regulation and functions of individual  
369 genes inferred to have undergone within-Arctic HGT await characterisation, e.g., using comparative  
370 transcriptomic approaches (Liang, Koester, Liefer, Irwin, & Finkel, 2019; Mock et al., 2017; Terrado et  
371 al., 2015) or through the expression and characterisation of candidate genes in transformable model  
372 algae. Finally, it remains to be determined to what extent discrete protein functional architectures  
373 have independently and convergently evolved in Arctic-, Antarctic-, and other cryophilic and ice-  
374 adapted (e.g., montane) algal species, as in the case of ice-binding domains, which may have  
375 independently originated multiple times within the tree of life (Stewart et al., 2021; Vance et al.,  
376 2019). Further functional, phylogenetic and environmental investigation of the Arctic algal metapan-  
377 genome may unveil effectors of the fitness or decline of small Arctic algae in a warming and  
378 freshening ocean environment (Li et al., 2009); and facilitate our understanding of the environmental  
379 fragility and future ecology of this important ocean biome.

## 380 **Materials and Methods**

### 381 *Cultures and nucleic acid isolation*

382 The algae were all isolated from Northern Baffin Bay within the Pikiyasorsuaq/ Northwater Polynya  
383 (Egeesiak et al., 2017) in June 1998 using a serial selection-dilution technique until a single species  
384 was isolated, and have been maintained as mono-algal cultures in L medium without Si at a salinity of  
385 30 and ca. 4 °C and under continuous illumination since (Terrado et al., 2015). Prior to growing the  
386 sub-cultures used for DNA sequencing, the culture was transferred to L medium with added  
387 antibiotics (Terrado et al., 2015) to minimize bacterial contamination, which was assessed via light  
388 microscopy.

389 Nucleic acids were harvested from the batch culture in late exponential phase by centrifugation at  
390 3000 *g* for 30 minutes at 4 °C. The supernatant was discarded and pellets were frozen in liquid  
391 nitrogen and stored at -80 °C until nucleic acid extraction. RNA and DNA was collected for whole  
392 genome sequencing following the U.S. Department of Energy Joint Genome Institute (DOE JGI)  
393 protocols (Rio et al., 2006).

### 394 *Sequencing*

395 Genomes in this study were sequenced on an Illumina platform using a combination of a 400-800 bp  
396 Tight Insert library with 1.5 kb, 4 kb, and 8 kb insert Cre-LoxP Recombination (CLR) libraries. For the  
397 pelagophyte CCMP2097, Ligation-free paired end (LFPE) libraries were additionally used.

398 For Tight Insert libraries, 2-3 µg of DNA was sheared to 400 bp or 800 bp using a Covaris LE220 pulse  
399 focused sonicator (Covaris) and size selected using a Pippin Prep (Sage Science). The fragments were  
400 end-repaired, A-tailed and ligated to Illumina compatible adapters (IDT, Inc) using a KAPA-Illumina

401 library creation kit (KAPA biosystems). For CLR libraries, 5-25 µg of DNA was sheared using a Covaris  
402 g-TUBE (Covaris) and gel size-selected for 1.5 kb, 4 kb, and 8 kb, respectively. The sheared DNA was  
403 end-repaired and ligated with biotinylated adapters containing loxP, circularized via recombination  
404 by a Cre excision reaction (NEB), and randomly sheared using a Covaris LE220 (Covaris). For LFPE  
405 libraries, 15-25 µg of DNA was sheared using HydroShear (Genomic Solutions) and gel size selected  
406 for 4.5 kb and 8 kb, respectively. The sheared DNA was end-repaired, ligated with biotinylated  
407 adapters, circularized by Intra-Molecular Hybridization, then digested with T7 Exonuclease and S1  
408 Nuclease (Invitrogen).

409 Sheared ligation fragments were end-repaired and A-tailed using the KAPA-Illumina library creation  
410 kit (KAPA biosystems) followed by immobilization of mate pair fragments on streptavidin beads  
411 (Invitrogen). Illumina compatible adapters (IDT, Inc) were ligated to the mate pair fragments and  
412 amplified with 8-12 cycles of PCR (KAPA Biosystems).

413 All four transcriptomes were sequenced using stranded Illumina RNA-Seq protocols. Poly(A)+ RNA  
414 was isolated from 10 µg total RNA using a Dynabeads mRNA isolation kit (Invitrogen), repeated twice  
415 to remove all residual rRNA contamination; then fragmented using RNA Fragmentation Reagents  
416 (Ambion) at 70 °C for 3 min, targeting fragments around 300 bp, and purified using AMPure SPRI  
417 beads (Agencourt). Reverse transcription was performed using random hexamer primers (Fermentas)  
418 and SuperScript II (Invitrogen), with annealing, elongation and inactivation steps of 65 °C for 5 min,  
419 42 °C for 50 min, and 70 °C for 10 min, respectively. Purified cDNA was used for second strand  
420 synthesis, with a dNTP mix where dTTP was replaced by dUTP at 16 °C for 2 h. Targeted (300 bp)  
421 double stranded cDNA fragments were purified using AMPure SPRI beads; then were blunt-ended,  
422 poly A-tailed, and ligated with TruSeq adaptors using Illumina DNA Sample Prep Kit (Illumina), and  
423 purified again. Second strand cDNA was removed through dUTP digestion with AmpErase UNG  
424 (Applied Biosystems). Digested cDNA was again cleaned up with AMPure SPRI beads, amplified by 10  
425 cycles PCR with Illumina TruSeq primers, and finally cleaned again with AMPure SPRI beads.

426 Both genome and transcriptome libraries were quantified using a next-generation sequencing library  
427 qPCR kit (KAPA Biosystems) and run on a LightCycler 480 real-time PCR instrument (Roche). The  
428 quantified libraries were prepared for sequencing utilizing a TruSeq paired-end cluster kit (v3), and a  
429 cBot instrument (Illumina) to generate a clustered flow cell, and sequenced on an Illumina HiSeq2000  
430 sequencer using a TruSeq SBS sequencing kit, v3, following a 2x100 or 2x150 indexed run recipe.

431 After sequencing, the genomic fastq files were screened for phix contamination. Reads composed of  
432 >95% simple sequence were removed. Illumina reads <50bp after trimming for adapter and quality  
433 (q<20) were removed. The remaining Illumina reads were assembled using AllPathsLG (Gnerre et al.,  
434 2011) parameters: DATA\_SUBDIR=data RUN=run SUBDIR=assem1 TARGETS=standard  
435 OVERWRITE=True THREADS=6 CLOSE\_UNIPATH\_GAPS=False). The resulting assembled scaffolds  
436 were screened against all bacterial proteins and organelle sequences from GenBank nr (Wheeler et  
437 al., 2006) and removed if found to be a contaminant. Illumina transcriptome reads were QC filtered  
438 to remove contamination and assembled into consensus sequences using Rnnotator v. 2.5.3 (Martin  
439 & Wang, 2011). Each genome was annotated using the JGI Annotation Pipeline, which detects and  
440 masks repeats and transposable elements, predicts genes, characterizes each conceptually translated  
441 protein with sub-elements such as domains and signal peptides, chooses a best gene model at each  
442 locus to provide a filtered working set, clusters the filtered sets into draft gene families, ascribes

443 functional descriptions (such as GO terms and EC numbers), and creates a JGI genome portal in  
444 PhycoCosm (<https://phycocosm.jgi.doe.gov/>) with tools for public access and community-driven  
445 curation of the annotation (Grigoriev et al., 2021; Kuo, Bushnell, & Grigoriev, 2014).

446 Residual contamination, including from Arctic bacteria, was eliminated from each genome using a  
447 custom pipeline based on phylogenetic assignment of all genes within each contig via BLAST best-hit  
448 search against a combined tree of life library, consisting of complete copies of UniRef, JGI genomes,  
449 and MMETSP algal transcriptomes (Dorrell et al., 2019; Dorrell et al., 2021a). Only genes assigned to  
450 the same contig as at least one gene of inferred vertical origin (*Baffinella* sp. CCMP2293-  
451 cryptomonads; Pavlovales sp. CCMP2436- haptophytes; *Ochromonas* sp. CCMP2298 and the novel  
452 pelagophyte CCMP2097- ochrophytes) were retained (Table S4, Sheet 1). A second round of cleaning  
453 was performed by reciprocal tBLASTn/ BLASTx searches of each peptide sequence against the  
454 corresponding MMETSP nucleotide transcriptome libraries (Keeling et al., 2014) that had been  
455 decontaminated through a previously published pairwise BLAST similarity analysis (Marron et al.,  
456 2016) (Table S4, Sheet 1). Only gene models that retrieved a reciprocal best hit with bidirectional  
457 threshold value  $10^{-05}$  were retained for downstream analyses. Between 3,056 (*Ochromonas* sp.  
458 CCMP2298) and 11,568 gene models (Pavlovales sp. CCMP2436) were confirmed to be of  
459 unambiguously non-contaminant origin for each genome, and retained for analysis of within-Arctic  
460 HGT (Table S4, sheet 1). Full details of the decontamination pipeline employed are provided in the  
461 linked supporting database <https://osf.io/3pmbx/> (Dorrell et al., 2021b) in the folder "Within-Arctic  
462 HGTs".

463 Comparisons of key properties between the assembled genomes, and their closest assembled  
464 relatives (accessed January 2018) in cryptomonads, haptophytes, pelagophytes, and chrysophyte-  
465 related species (16) are provided in Table S2, Sheets 1-5. Per-gene analyses of the amino acid  
466 compositions of each genome and transcriptome included in this study, as defined below, are  
467 provided in the linked supporting database <https://osf.io/3pmbx/> (Dorrell et al., 2021b) in the folder  
468 "Genome quantitative analysis".

#### 469 *Multigene phylogeny*

470 A pan-algal dataset of 21 genomes, including the four sequenced in this study (accessed January  
471 2018) (Grigoriev et al., 2021) and 296 decontaminated MMETSP transcriptomes (Keeling et al., 2014;  
472 Marron et al., 2016) was assembled for eight algal groups for which at least one sequenced Arctic  
473 genome or transcriptome has been completed: these being chlorophytes, chrysophyte-related  
474 species (including synchromophytes, pinguiophytes and eustigmatophytes (Dorrell et al., 2021a)),  
475 cryptomonads, diatoms, dictyochophytes, dinoflagellates, haptophytes and pelagophytes. The  
476 isolation sites of each sequenced species, and minimum and maximum recorded viable growth  
477 temperatures, were manually confirmed by comparing to the accession records in public culture  
478 collections, considering synonymous culture identifiers where present (Gachon et al., 2013; Guiry et  
479 al., 2014; Vaulot, Le Gall, Marie, Guillou, & Partensky, 2004), and are provided in Table S1, Sheet 1.

480 Reference sequences from a previously assembled eukaryotic multigene tree (Burki et al., 2016;  
481 Strasser et al., 2021) were enriched using diamond v0.9.30.131 (Buchfink, Xie, & Huson, 2015) with  
482 orthologues from all members of this dataset. To infer phylogenies, single-gene datasets were  
483 aligned by MAFFT v7.407 (Katoh, Rozewicki, & Yamada, 2017) using the L-INS-i refinement and a  
484 maximum of 1000 iterations, then trimmed by trimAl v1.4 (Capella-Gutiérrez, Silla-Martínez, &

485 Gabaldón, 2009) using the -gt 0.5 setting. ML trees were inferred by IQ-TREE v 1.6.12 (Nguyen,  
486 Schmidt, von Haeseler, & Minh, 2015) using the LG+F+G model. Paralogs were manually removed  
487 from single-gene datasets, considering their branching and alignment coverage. The concatenated  
488 multi-gene alignment was finally trimmed to remove sites with more than 20% gaps with trimAl (-gt  
489 0.8) and sites exhibiting the fastest exchange rates with TIGER(-exc 10 -b 10; (Cummins & McInerney,  
490 2011)) analogously to the reference multi-gene matrix (Burki et al., 2016). The final ML tree was  
491 reconstructed using the Posterior Mean Site Frequency (PMSF) model of IQ-TREE on a LG+F+G guide  
492 tree, with the multi-gene matrix treated as a single partition to eliminate small sample LBA bias(H. C.  
493 Wang, Susko, & Roger, 2019). Incorporated gene and tree topologies are provided in Table S1, sheets  
494 2-3; and single-gene alignments and topologies, and concatenated alignments are provided in the  
495 linked supporting database <https://osf.io/3pmbx/> (Dorrell et al., 2021b) in the folder "Multigene tree  
496 topologies".

#### 497 *18S and 16S phylogeny*

498 18S rDNA and chloroplast 16S rDNA sequences corresponding to cultured isolates, and uncultured  
499 environmental isolates from the Arctic and Antarctic/Southern Oceans were downloaded for four  
500 algal groups (cryptomonads; haptophytes; chrysophyte-related taxa, including chrysophytes,  
501 synchromophytes, pinguiphytes and eustigmatophytes; and pelagophytes/ dictyochophytes)  
502 (Dorrell et al., 2021a), from GenBank nr (March 2020) (59). These were supplemented with  
503 orthologues searched for each group from MMETSP nucleotide sequence libraries by BLASTn, using a  
504 randomly selected downloaded query from the group considered, and a threshold e-value of  $10^{-05}$ .  
505 Homologous sequences were identified by a reciprocal BLASTn search against a complete copy of the  
506 *Arabidopsis thaliana* chloroplast, mitochondria and nuclear genome enriched with the query  
507 sequence; only sequences that retrieved the query as the BLAST best hit were retained (Sato,  
508 Nakamura, Kaneko, Asamizu, & Tabata, 1999). A complete set of query sequences are provided in  
509 Table S1, sheet 4.

510 Retained homologues were aligned using MAFFT (v. 7.407) under the --auto and --adjustdirection  
511 settings; and manually edited to remove non-homologous, fragmented and chimeric sequences  
512 (Kato et al., 2017). Curated alignments were trimmed with trimAl under the -gt 0.5 and -gt 0.8  
513 settings (Capella-Gutiérrez et al., 2009); and tree topologies were inferred from trimmed alignments  
514 using MrBayes v 3.2.1 and RAXML v 8.0 as integrated into the CIPRES web server (Miller et al., 2015;  
515 Stamatakis, 2014). MrBayes trees were run with two chains for 600,000 generations with burnin  
516 fractions of 0.5, and were manually verified in each case to have reached a final convergence statistic  
517 of  $\leq 0.1$  prior to calculation of the consensus topology; whereas RAXML trees were run by default for  
518 450 bootstrap replicates, with automatic bootstopping applied. Curated alignments, individual and  
519 consensus tree topologies are provided in Table S1, sheets 4-7; and in the linked supporting database  
520 <https://osf.io/3pmbx/> (Dorrell et al., 2021b) in the folder "18S and 16S trees".

#### 521 *Tara Oceans calculations*

522 Ribotypes corresponding to the 18S rRNA (V4 and V9 variable regions) and 16S rRNA (V4V5 regions)  
523 sequences of each species were identified from version 2 (Arctic-inclusive) of *Tara Oceans* data  
524 (Ibarbalz et al., 2019) using the 18S and 16S trees defined above as a guide. Briefly, the complete 18S  
525 or 16S sequence of the species in question was searched by BLASTn against all 18S or 16S plastidial  
526 sequences previously assigned to the same taxonomic group as the query (*Baffinella* sp. CCMP2293:

527 cryptomonads; Pavlovales sp. CCMP2436: haptophytes; *Ochromonas* sp. CCMP2298: chrysophytes;  
528 novel pelagophyte CCMP2097: pelagophytes), with threshold e-value  $10^{-05}$ . Matching sequences  
529 were then searched against the complete curated 18S or 16S alignments for each group using  
530 BLASTn, and only sequences that yielded BLAST best hits against either the query sequence or its  
531 immediate sister groups in the 18S or 16S tree topology were retained for subsequent analysis.

532 Retained ribotypes were realigned against the reference library using MAFFT under the --auto  
533 setting, manually trimmed to retain only the 18S V4, 18S V9, or 16S V4V5 regions, and finally  
534 trimmed with trimAl under the -gt 0.5 setting (Capella-Gutiérrez et al., 2009; Katoh et al., 2017); and  
535 trees were calculated from curated alignments using RAxML with automated bootstrapping, as  
536 defined above (Stamatakis, 2014). Finally, ribotypes that were inferred from the best-scoring RAxML  
537 tree topology to be more closely related to the Arctic query species than the nearest cultured non-  
538 Arctic reference; and had a minimum 97% nucleotide similarity to the Arctic query species 18S or 16S  
539 rDNA sequence as assessed by BLASTn search; were retained for the calculation of absolute and total  
540 relative abundances, expressed as the proportion of all 18S V4, 18S V9 or 16S V4V5 ribotypes present  
541 in a sample. Curated alignments and tree topologies are provided in Table S1, sheets 8-9; tabulated  
542 individual and total read abundances are provided in Table S1, sheets 10-11; and all raw data  
543 pertaining to the identification of matching ribotypes by BLAST and phylogeny, and calculation of  
544 quantitative abundance trends, are provided in the linked supporting database <https://osf.io/3pmbx/>  
545 (Dorrell et al., 2021b) in the folder "TARA Oceans calculations".

#### 546 *Quantitative analysis of PFAM content*

547 PFAM distributions for each algal genome in the pan-algal dataset (both newly and previously  
548 sequenced accessions) were reannotated for this study using InterProScan and an updated  
549 (December 2020) version of the PFAM database from the constituent fasta files for each genome  
550 (Jones et al., 2014; Mistry et al., 2020). PFAM annotation files for each MMETSP transcriptome were  
551 manually downloaded from the source accession; and cleaned using a previously defined pipeline  
552 which compares the relative BLAST similarity between pairs of nucleotide sequences in each  
553 MMETSP library to identify transcripts of potential contaminant origin (Dorrell et al., 2019; Marron et  
554 al., 2016). Tabulated PFAM outputs are provided in Table S2, sheet 6; and complete PFAM lists per  
555 gene for each decontaminated library are provided in the linked supporting database  
556 <https://osf.io/3pmbx/> (Dorrell et al., 2021b) in the folder "PFAM Bray-Curtis distributions".

557 Phylogenetically-aware PCA was performed on both genome and transcriptome datasets (Revell &  
558 Graham Reynolds, 2012), due to strong taxonomic effects observed using crude phylogeny-  
559 independent analyses. Edited versions of the multigene tree topology (Fig. 1) retaining only genome-  
560 or transcriptome branches, were generated using MEGA version X as phylogenetic templates (Kumar,  
561 Stecher, Li, Knyaz, & Tamura, 2018). Input and output data for PCA are provided for user exploration  
562 in Table S2, sheet 7; and in the linked supporting database <https://osf.io/3pmbx/> (Dorrell et al.,  
563 2021b) in the folder "CAFE and phylPCA".

564 Similarity in PFAM content between different algal PFAM libraries were calculated using Bray-Curtis  
565 (Anderson et al., 2016; Horn et al., 2016) and Spearman indices (Choi & Kim, 2007; Nelson et al.,  
566 2021) following previous studies; and the total number concordant PFAMs between each library pair  
567 were additionally normalised against the total number of complete (single-copy or duplicated)  
568 eukaryotic BUSCOs retrieved in each library (Simão, Waterhouse, Ioannidis, Kriventseva, & Zdobnov,

569 2015). A schematic diagram explaining the methodology used, and the different types of  
570 convergence visible using each technique, is provided in Fig. 3- Figure Supplement 2.

571 For Bray-Curtis and Spearman calculations, algae were divided into three functional categories: Arctic  
572 (species isolated from > 60°N); Antarctic (species isolated from > 55°S); and all remaining taxa from  
573 intermediate latitudes grouped as “Other”. To avoid introducing biases due to comparing taxa of  
574 unequal phylogenetic distance, Bray-Curtis and Spearman calculations were only compared between  
575 pairs of algal libraries from different taxonomic groups, and to avoid biases due to comparing taxa  
576 with highly divergent life-strategies, all freshwater and secondarily non-photosynthetic taxa were  
577 removed from the final dataset. These values were then used to calculate mean values, and perform  
578 one-way ANOVAs of difference, within and between different groups of algae in the dataset,  
579 separated by biogeography into “Arctic”, “Antarctic” and “Other” taxa, as above. Tabulated Bray-  
580 Curtis and Spearman outputs are provided in Table S2, sheets 8-12; and all raw data, including  
581 alternative format outputs, are provided in the linked supporting database <https://osf.io/3pmbx/>  
582 (Dorrell et al., 2021b) in the folder "PFAM Bray-Curtis distributions".

### 583 *Identification of Arctic-associated PFAMs*

584 PFAMs whose presence or absence were specifically associated with Arctic species were assessed by  
585 calculating the frequency with which the PFAM was recovered in Arctic, compared to non-Arctic  
586 species (“Antarctic” or “Other”) in the dataset (Table S2, sheet 6). These frequencies were used to  
587 calculate a ratio and a chi-squared P-value of enrichment of the PFAM in Arctic species in the dataset  
588 with cutoff P-value  $10^{-05}$ . Only PFAMs that were detected in both Arctic genomes and Arctic  
589 transcriptomes were considered as possible candidates for enrichment; and “Freshwater” and “Non-  
590 Photosynthetic” species were excluded from the dataset to avoid introducing artifacts by comparing  
591 species with highly divergent life strategies.

592 To accurately identify expansions and contractions in PFAM content across each species, high-  
593 frequency PFAMs (defined as PFAMs for which the maximum frequency minus minimum frequency  
594 observed was greater than 100 across the entire dataset) were first fragmented into smaller  
595 orthogroups. Briefly, profiles were extracted for each high frequency PFAM using hmfetch (Potter  
596 et al., 2018), and then re-annotated for all libraries using hmmsearch with threshold expect value  $10^{-05}$ .  
597 Proteins containing these domains were used to run OrthoFinder v 2.4.1 (Emms & Kelly, 2019)  
598 with inflation value 1.3 to avoid over-fragmentation of orthogroups. Orthogroups were filtered  
599 (maximum – minimum frequency > 2) to remove uninformative examples, then the presence of  
600 PFAM domains (defined as presence in at least 10% of protein space within the orthogroup) were  
601 called for each orthogroup.

602

603 Computational Analysis of gene Family Evolution (CAFE) was performed on the composite set of low-  
604 frequency PFAMs, and orthogroups decomposed from high-frequency PFAMs, for separate sets of  
605 genome- and transcriptome-only libraries, using MEGA-edited versions of the previously generated  
606 multigene reference tree, as per the phylPCA analysis above. (Kumar et al., 2018) A single gamma  
607 rate for the lambda and error model was assessed from the low-frequency PFAM dataset across the  
608 entire phylogenetic tree. The CAFE outputs obtained were used to calculate enrichment ratios and P-  
609 values for “expansions”, defined as signed positive CAFE scores, and “contractions”, defined as  
610 signed negative CAFE scores for Arctic species within the dataset, using methodology as defined



611 above. Summarised CAFE outputs and P-values are provided in Table S3, sheets 1-2; and all raw data,  
612 including the prior decomposition of PFAMs into orthogroups, are provided in the linked supporting  
613 database <https://osf.io/3pmbx/> (Dorrell et al., 2021b) in the folder “CAFE and phylPCA”.

614

#### 615 *Environmentally supported phylogenies of Arctic-associated PFAMs*

616

617 The environmental distributions of sequences containing three PFAMs (PF03831, PF03988, and  
618 PF11999) whose presence was significantly associated with Arctic species in the enrichment analysis  
619 above were investigated in meta-transcriptome and meta-genome sequence data from the *Tara*  
620 Oceans Expedition, inclusive of sequences from the Arctic Ocean (Carradec et al., 2018; Ibarbalz et  
621 al., 2019). Sequences containing each PFAM were extracted using hmmer with gathering threshold  
622 option (Potter et al., 2018); and were classified into four categories based on the sum of all relative  
623 abundances (normalised against the total number of meta-T or meta-G unigenes sequenced from the  
624 sample) across all stations and size/depth fractions. These were : “Arctic” sequences (> 70% summed  
625 relative abundances contained in stations of > 60 °N); “Antarctic” sequences (> 70% summed relative  
626 abundances contained in stations of > 55°S); “Bipolar” sequences, (> 70% summed relative  
627 abundances contained in stations of > 60°N or > 55°S, including >20% each in stations > 60°N and  
628 stations > 55°S); and “Other” (< 70% summed relative abundances contained in stations of > 60°N  
629 and > 55°S).

630

631 The *Tara* Oceans sequences were aligned against all sequences containing the PFAM concerned from  
632 all algal genomes and transcriptomes considered within this study; and all sequences containing the  
633 PFAM in UniRef (downloaded March 2020) (Suzek et al., 2007); using mafft under the --auto setting,  
634 followed by a more stringent round of alignment using --gap\_open\_penalty 12, --  
635 gap\_extension\_penalty 3 and --maxiteration 2 settings to remove poorly aligned sequences (Kato  
636 et al., 2017). Cultured sequence accessions were manually labelled with “Arctic” and “Antarctic”  
637 provenance considering the isolation site of the species, where recorded (Guiry et al., 2014).  
638 Alignments were manually trimmed after each step, and subsequently trimmed with TrimAl using the  
639 -gt 0.5 setting (Capella-Gutiérrez et al., 2009); and finally used to infer best-scoring trees with RAxML  
640 using the PROTGAMMAGTR, PROTGAMMAJTT and PROTGAMMAWAG substitution matrices  
641 (Stamatakis, 2014). Environmental sequence calculations, and individual and consensus topologies  
642 for each tree are provided in Table S3, sheets 3-7; and in the linked supporting database  
643 <https://osf.io/3pmbx/> (Dorrell et al., 2021b) in the folder “Environmental PFAM calculations”.

644

#### 645 *Global identification of within-Arctic HGTs*

646

647 Global biases in algal genome or transcriptome composition, which may reveal underlying HGT  
648 events, were inferred using a linear regression pipeline adapted from previous studies (Dorrell et al.,  
649 2021a; Stiller et al., 2014)(Fig. 6- Figure Supplement 1). To avoid incorporating biological  
650 contaminants into these analyses, all four Arctic genomes were initially refined to a “best  
651 confidence” set of genes, as described above, consisting of genes present on an assembled contig  
652 with at least one gene of clear vertical origin (*Baffinella* sp. CCMP2293 : cryptomonads; Pavlova  
653 sp. CCMP2436 : haptophytes; *Ochromonas* sp. CCMP2298 : chrysophytes and novel pelagophyte  
654 CCMP2097 : pelagophytes) based on BLASTp best-hit analysis of a combined library from across the  
655 tree of life as defined below (Dorrell et al., 2021a); and presence of a corresponding transcript in

656 decontaminated MMETSP transcriptome assemblies for the species, inferred by reciprocal BLASTp  
657 best-hit searches (Keeling et al., 2014).

658

659 Next, a *comparative pair* of query genomes from a specific algal lineage, one Arctic and one non-  
660 Arctic (e.g., *Baffinella* sp. CCMP2293, and *Guillardia theta*, from cryptomonads (Curtis et al., 2012))  
661 were searched against a composite dataset of Arctic and non-Arctic genomes and transcriptomes  
662 from another algal group (e.g., chlorophytes) via LAST (Kielbasa et al., 2011), and the best-scoring  
663 reference sequences (defined by bitscore) to each query gene were recorded. As both *Baffinella*  
664 CCMP2293 and *G. theta* are of equivalent phylogenetic distance to all chlorophytes, the number of  
665 LAST best hits obtained by the *Guillardia* genome to each reference chlorophyte sequence should act  
666 as a predictor of the number of hits obtained by the *Baffinella* genome, with positive deviations from  
667 this, as inferred by linear regression, potentially relating to more recent HGTs between the *Baffinella*  
668 genome and the reference species. A schematic diagram explaining the methodology; and exemplar  
669 scatterplot outputs, are provided in Fig. 6- Figure Supplement 1. These analyses were repeated  
670 independently for four comparative pairs of Arctic and non-Arctic query genomes (*Baffinella*  
671 CCMP2293 v *Guillardia theta*; Pavlovales CCMP2436 v *Chrysochromulina tobin*; *Ochromonas*  
672 CCMP2298 v *Nannochloropsis gaditana*; and the novel pelagophyte CCMP2097 v *Aureococcus*  
673 *anophageferrens*), and combined reference libraries generated from the eight algal lineages  
674 considered in this study (chlorophytes, chrysophytes, cryptomonads, diatoms, dictyochophytes,  
675 dinoflagellates, haptophytes and pelagophytes), with the exception of within-taxon comparisons  
676 (e.g., cryptomonad query genomes were not compared to the cryptomonad reference dataset).  
677 Details of the scripts, and tabulated LAST best hit frequencies, are provided in Table S4, sheets 2-3;  
678 and in the linked supporting database <https://osf.io/3pmbx/> (Dorrell et al., 2021b) in the folder  
679 “Within-Arctic HGTs”.

680

681 Altogether, 1,322 genes from Arctic genomes that either retrieved an Arctic LAST best hit when  
682 searched against at least one of the algal reference libraries; or that themselves were retrieved as  
683 LAST best hits; or corresponded to MMETSP transcripts retrieved as LAST best hits to another Arctic  
684 genome query were used as seed sequences for subsequent identifications of within-Arctic HGT  
685 (schematic workflow presented in Fig. 6- Figure Supplement 2). Briefly, these seed sequences were  
686 searched by BLASTp against a previously assembled composite reference library (Dorrell et al., 2019;  
687 Dorrell et al., 2021a) containing a complete copy of UniRef (Suzek et al., 2007); all JGI algal  
688 genomes (Grigoriev et al., 2021); and decontaminated copies of the MMETSP (Keeling et al., 2014;  
689 Marron et al., 2016) and OneKP transcriptomes (Carpenter et al., 2019; Initiative, 2019); along with  
690 independently sequenced reference transcriptomes e.g., from diatoms (Dorrell et al., 2021a) and  
691 chrysophytes (Beisser et al., 2017); and here manually annotated by isolation site (Arctic, Antarctic or  
692 Other as defined above). 229 genes that (i) did not yield a BLAST best hit against the same taxonomic  
693 group as the query (*Baffinella* sp. CCMP2293 : cryptomonads; Pavlovales sp. CCMP2436 :  
694 haptophytes; *Ochromonas* sp. CCMP2298 : chrysophytes and novel pelagophyte CCMP2097 :  
695 pelagophytes) and (ii) included at least one Arctic species in the best ten BLASTp hits were retained  
696 for subsequent analysis. Query genes searched are provided in Table S4, sheet 4; and the ten best  
697 BLASTp hits for each query sequence in Table S4, sheet 6.

698

699 A full set of orthologues were assembled for each retained query sequence by retrieving the LAST  
700 best hit for 151 non-redundant taxonomic groups from the all tree of life library used above (Dorrell

701 et al., 2019; Dorrell et al., 2021a); the pan-algal dataset of genomes and transcriptomes used in this  
702 study; and a further set of 33 eukaryotic reference genomes and 59 prokaryotic reference genomes,  
703 sampled to include diverse representation from the tree of life, including multiple Arctic and  
704 Antarctic prokaryotes (Table S4, sheet 5); along with all sequences identified from the genomes and  
705 MMETSP transcriptomes of each of the four Arctic algae sequenced in this study that could be  
706 retrieved by LAST with threshold e-value  $10^{-05}$ . Clusters for pairs of seed sequences that were found  
707 to show greater similarity to one another than any non-seed sequence within the cluster via internal  
708 BLAST searched were merged, yielding 215 merged gene clusters of non-redundant seed sequences  
709 and a total set of approx. 300-500 orthologues from across the tree of life (Fig. 6- Figure Supplement  
710 2).

711  
712 Alignments were constructed for each merged gene cluster using MAFFT with the --auto setting;  
713 followed by a second round of alignment with the --gap\_open\_penalty 12 --gap\_extension\_penalty 3  
714 --max\_iteration 2 settings; then trimmed using TrimAl with the -gt 0.5, -resoverlap 0.75 and -  
715 seqoverlap 0.8 settings; followed by a final round of alignment with MAFFT (Capella-Gutiérrez et al.,  
716 2009; Katoh et al., 2017). Clusters containing poorly aligned or fragmented seed sequences were  
717 manually identified and rejected at each step, retaining 129 approved gene clusters (Fig. 6- Figure  
718 Supplement 2). Approved gene clusters were used to generate RAxML consensus trees, with 300  
719 bootstrap replicates and the PROTGAMMAJTT substitution model. 21 of the realised trees were  
720 found to contain monophyletic groups of multiple Arctic species with > 50% bootstrap support; and a  
721 further 13 contained groups consisting of a majority of Arctic species with some Antarctic or non-  
722 polar species, with > 50% support for the ancestral node (Fig. 6- Figure Supplement 2; Table S4, Sheet  
723 9). Finalised alignments and consensus tree topologies are provided in Table S4, sheets 7-8; and all  
724 intermediate alignment processing steps, and individual bootstrap replicates for each tree, are  
725 provided in the linked supporting database <https://osf.io/3pmbx/> (Dorrell et al., 2021b) in the folder  
726 "Candidate HGT trees".

727  
728 Inferred functions were inspected for all genes from each Arctic query genome identified at each  
729 stage of the pipeline (all decontaminated genes; all genes with a within-Arctic LAST best hit; all genes  
730 with an Arctic top ten BLAST best-hit; and all genes confirmed by single-gene trees to be participants  
731 of within-Arctic HGTs). The assessed functions included KEGG and KOG annotations, assessed by  
732 BlastKOALA and GhostKOALA (Kanehisa & Sato, 2020); PFAM domains, inferred by  
733 InterProScan (Jones et al., 2014); absolute and ranked rpkm values of transcripts corresponding to  
734 each gene in corresponding MMETSP transcriptomes derived under different physiological conditions  
735 (Terrado et al., 2015); and predicted subcellular localisations, inferred using ASAFind v 2.0 used in  
736 conjunction with Signal P v 3.0 (Gruber, Rocap, Kroth, Armbrust, & Mock, 2015), HECTAR using a  
737 default scoring matrix (Gschloessl, Guermeur, & Cock, 2008), and WolfPSort, taking the consensus  
738 annotations obtained with animal, fungal and plant reference models (Horton et al., 2007).  
739 Tabulated functions associated with each sequence, and two-tailed chi-squared enrichment values  
740 for each function in within-Arctic HGTs, are provided in Table S4, sheets 9-12.

741  
742 Finally, *Tara* Oceans unigenes corresponding to within-Arctic HGTs were identified by hmmer using  
743 HMMs composed of all Arctic isolate sequences from the untrimmed alignments for each gene  
744 family, as above. Peptide sequences of the unigenes retrieved using this approach were first  
745 searched against all sequences in the corresponding gene family alignment by BLASTp with the -

746 max\_target\_seqs 1 parameter. Unigenes that yielded a best BLAST hit against an Arctic species were  
747 realigned against the gene family alignment with mafft under the --auto setting; and used to build  
748 neighbour-joining trees with 100 replicates in GeneIOUS v. 10.0.9. Unigenes that mapped to within-  
749 Arctic HGT clade within these trees were extracted, and used to calculate total relative  
750 environmental abundances across all depths and size fractions in *Tara* Oceans data, as above. Details  
751 of the BLAST outputs, alignments, phylogenetically reconciled TARA sequences and relative  
752 abundance calculations, are provided in Table S4, sheets 10-11; and in the linked supporting  
753 database <https://osf.io/3pmbx/> (Dorrell et al., 2021b) in the folder “Within-Arctic HGTs”.

754

#### 755 *Data deposition*

756 The genome assemblies and annotations are available from JGI PhycoCosm portal (Grigoriev et al.,  
757 2021) and have been deposited in DDBJ/ENA/GenBank with the following URLs and NCBI accessions:  
758 CCMP2293: [https://phycocosm.jgi.doe.gov/Crypto2293\\_1](https://phycocosm.jgi.doe.gov/Crypto2293_1), PRJNA223438; CCMP2436: [https://](https://phycocosm.jgi.doe.gov/Pavlov2436_1)  
759 [phycocosm.jgi.doe.gov/Pavlov2436\\_1](https://phycocosm.jgi.doe.gov/Pavlov2436_1) PRJNA223446; CCMP2298: [https://](https://phycocosm.jgi.doe.gov/Ochro2298_1)  
760 [phycocosm.jgi.doe.gov/Ochro2298\\_1](https://phycocosm.jgi.doe.gov/Ochro2298_1), PRJNA171379; CCMP2097: [https://](https://phycocosm.jgi.doe.gov/Pelago2097_1)  
761 [phycocosm.jgi.doe.gov/Pelago2097\\_1](https://phycocosm.jgi.doe.gov/Pelago2097_1), PRJNA210205;.

762 All additional supporting data, including the composition of the global and taxonomic reference  
763 datasets used in this study; comparisons to previously published genome assemblies (Armbrust et al.,  
764 2004; Derelle et al., 2006; Gobler et al., 2011; Grigoriev et al., 2021; Hovde et al., 2015; Lin et al.,  
765 2015; Lommer et al., 2012; Mock et al., 2017; Radakovits et al., 2013; Rastogi et al., 2018; Read et al.,  
766 2013; D. M. Wang et al., 2014; Worden et al., 2009); 18S, 16S and multigene trees; *Tara* Oceans  
767 Expedition calculations; phyIPCA, CAFE and PFAM frequency analyses; LAST and phylogenetic  
768 analyses of within-Arctic HGTs and Arctic-specific gene expansions and contractions are provided via  
769 a dedicated osf.io database (Dorrell et al., 2021b) <https://osf.io/3pmbx/>. Data is classified within  
770 this database by project, each of which contains an associated README file describing the folder  
771 contents, and associated methodology for its production.

#### 772 **Author contributions**

773 CL isolated the strains and coordinated the global study. MP and REE grew and maintained the  
774 culture, with MPB responsible for nucleic acid isolation and quality control. KB, JS, and IVG  
775 coordinated genome projects, and RGD coordinated functional analysis of each species. AK, JJ, LH,  
776 AS, CP, AL, YP and KL produced the genome data; and RGD, AK, ASS, NZ, ZF, FI, JPK and ER analysed  
777 the genome data. AMGNV, JM, NJF, FRJV, VL, BH, JBD, CdV and PW provided additional supporting  
778 data. RGD, AK, ER, ZF, CL, CB and IVG wrote the manuscript with comments on different sections by  
779 co-authors.

#### 780 **Acknowledgments**

781 The work conducted by the U.S. Department of Energy Joint Genome Institute, a DOE Office of  
782 Science User Facility, is supported by the Office of Science of the U.S. Department of Energy under  
783 Contract No. DE-AC02-05CH11231. RGD and AMGNV acknowledge funding from a CNRS Momentum  
784 Fellowship (2019-2021) awarded to RGD. CL received support from the Discovery program of Natural  
785 Science and Engineering Council (NSERC, Canada) and a pilot project grant from Genome Québec. CB  
786 acknowledges funding from the European Research Council (ERC) under the European Union’s  
787 Horizon 2020 research and innovation programme (grant agreement No. 835067; Diatomic), the

788 French Government 'Investissements d'Avenir' programmes MEMO LIFE (ANR-10-LABX-54), PSL\*  
 789 Research University (ANR-1253 11-IDEX-0001-02), France Génomique (ANR--10-INBS-09) and  
 790 OCEANOMICS (ANR-11-BTBR-0008), and Research Grant 'Green Life in the Dark' (RGP0003/2016)  
 791 from the Human Frontier Science Program. CB, FMI and JPK acknowledge support from ECOS Sud-  
 792 Argentine program (AT08ST18). ZF acknowledges support from the J.W. Fulbright Commission of the  
 793 Slovak Republic and computational resources supplied by the project "e-Infrastruktura CZ" (e-INFRA  
 794 LM2018140) provided within the program Projects of Large Research, Development and Innovations  
 795 Infrastructures. The authors thank E. Virginia Armbrust (University of Washington) and Jackie Collier  
 796 (Stony Brook Univ. New York) for permission to use a *Pseudo-nitzschia multiseries* genome for  
 797 comparative PFAM analysis, and *Aplanochytrium kerguelense*, *Auriantiochytrium limacinum*, and  
 798 *Schizochytrium aggregatum* transcriptomes for phylogenetic dataset construction, respectively. The  
 799 authors respectfully acknowledge that the research within this project benefits from the sampled  
 800 indigenous biodiversity of the Inuit Nunangat, and was partially performed on the traditional lands  
 801 and Treaty 6 and unceded territories of multiple First Canadian Nations. This article is contribution  
 802 number XX of the *Tara* Oceans project.

803  
 804 **Figures**

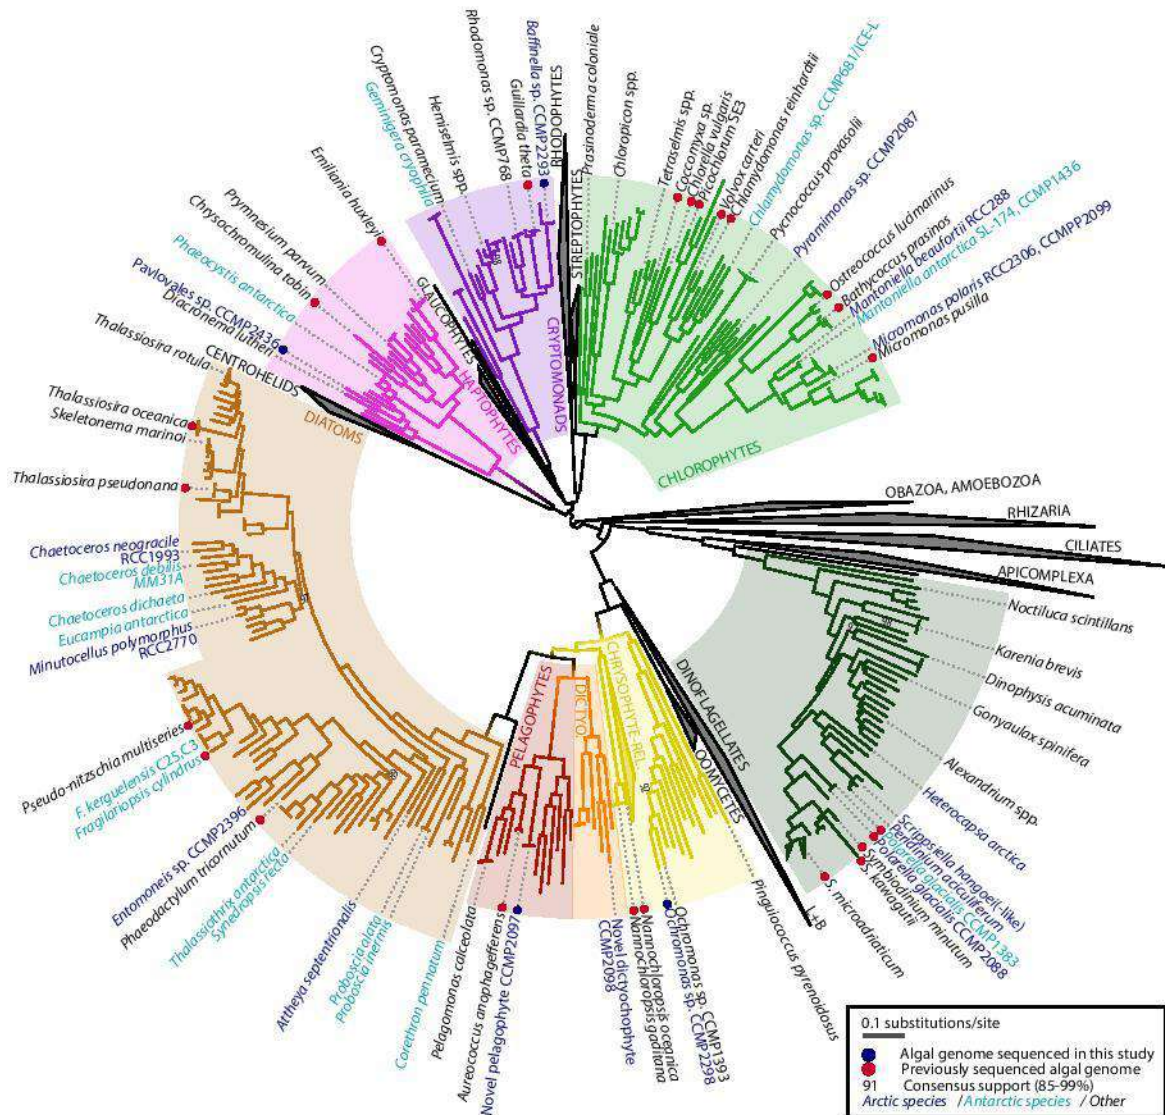

805

806 **Fig. 1. Distant evolutionary relationships of Arctic and Antarctic algae.** Consensus ML topology of a  
807 391 taxa x 39,504 aa alignment based on 250 conserved single-copy nuclear genes from across the  
808 eukaryotic tree of life (22); supplemented with all genomes and MMETSP transcriptomes from eight  
809 algal groups (cryptomonads, chlorophytes, chrysophytes, dictyochophytes, diatoms, dinoflagellates,  
810 haptophytes and pelagophytes) with at least one sequenced Arctic species. Branch colour  
811 corresponds to the phylogeny, and text colour the isolation site of each species considered. All  
812 sequenced algal genomes, sequenced Arctic and Antarctic algal species, and taxonomically  
813 representative taxa for each algal group are labelled. Genome libraries sequenced in this study are  
814 shown with blue circles.

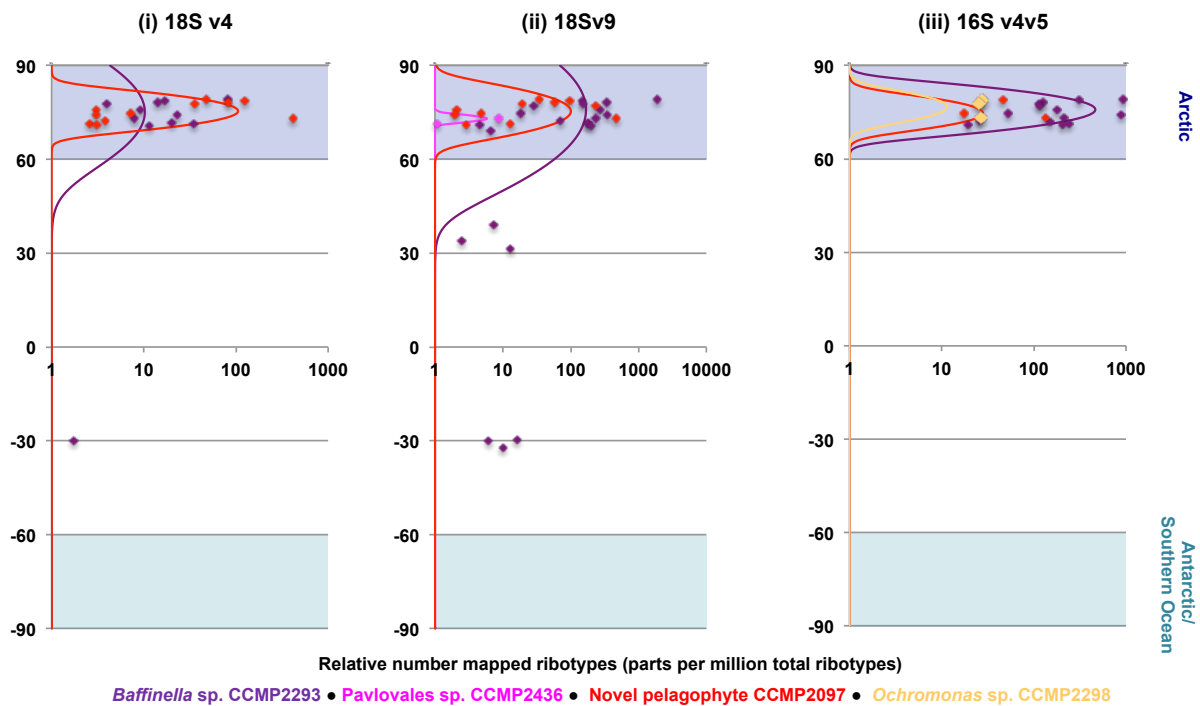

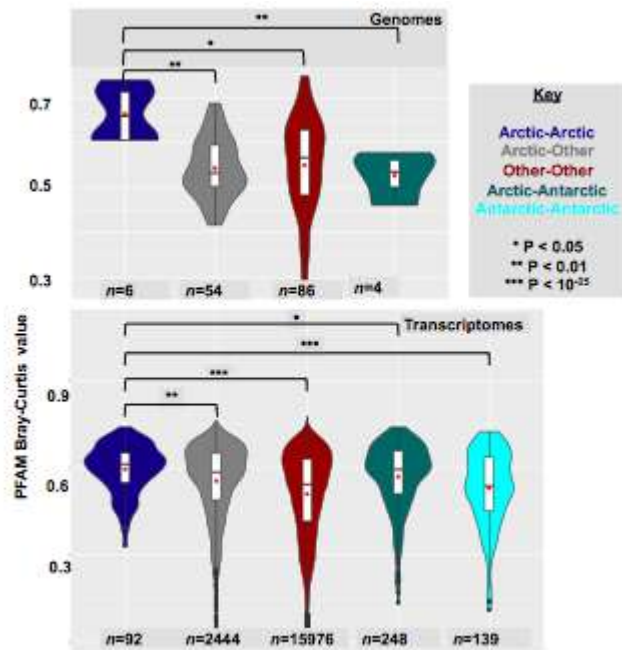

823

824 **Fig. 3. Convergence of PFAM domain contents of Arctic-specific algae.** Violin plots of Bray-Curtis  
825 indices calculated between PFAM distributions of pairs of algal genomes (top) or transcriptomes  
826 (bottom), separated by habitat: Arctic (isolation site > 60°N), Antarctic (isolation site > 55°S) or Other  
827 (all intermediate latitudes). Comparisons between members of the same taxonomic group, and  
828 involving either freshwater or obligately non-photosynthetic species were excluded from the  
829 analyses. Genomic calculations involving Antarctic species are not shown due to the presence of only  
830 one Antarctic genome (*Fragilariopsis cylindrus*) in the pan-algal dataset. Significance values of one-  
831 way ANOVA tests of the separation of means (red dots) are provided between Arctic-Arctic species  
832 pairs, and all other forms of species pairs considered.

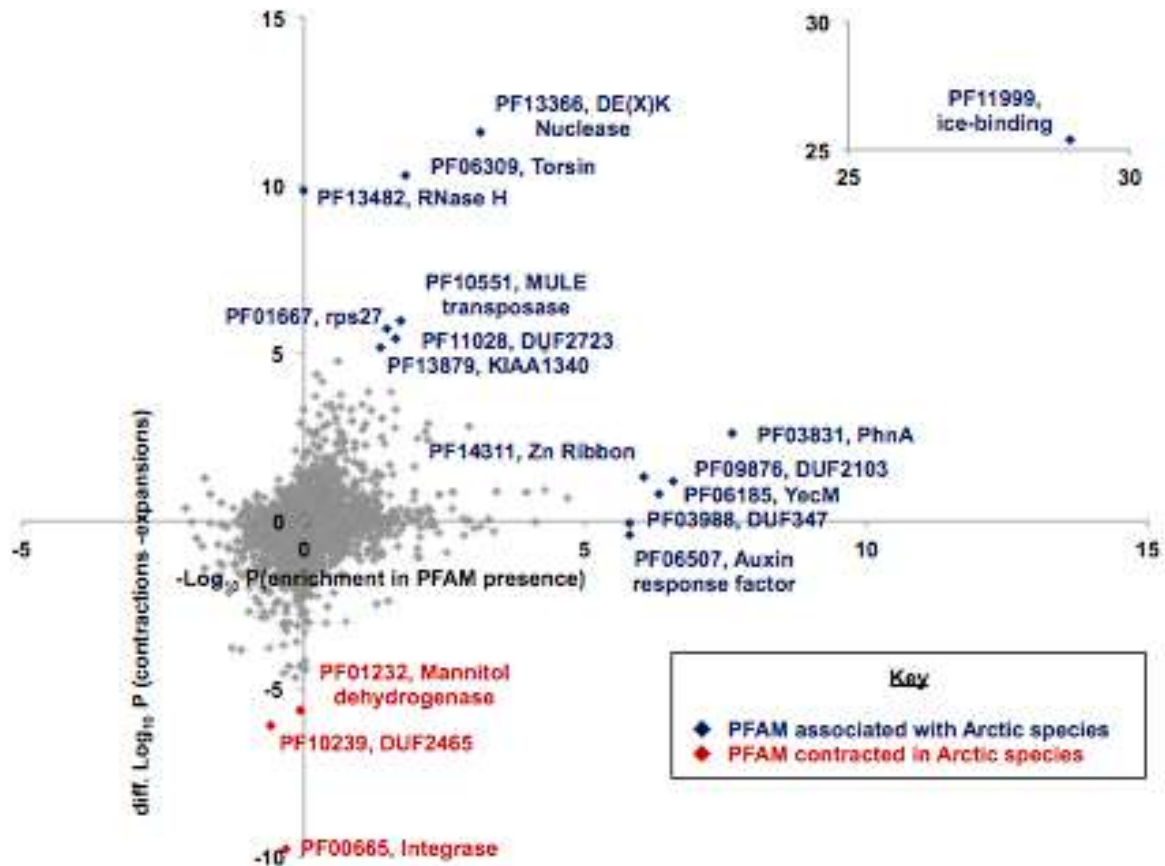

833

834 **Fig. 4. Arctic-specific expansions and contractions of PFAM domains.** Scatterplot of 3,858 PFAMs,  
 835 detected in at least one algal genome and one algal transcriptome, and having inferred to have  
 836 undergone at least one expansion or contraction by CAFE of genome data and at least one expansion  
 837 and contraction by CAFE of transcriptome data; showing possible enrichments and depletions in  
 838 Arctic species. The horizontal axis shows the signed  $-\text{log}_{10}$  chi-squared P-value of the presence of  
 839 PFAMs in Arctic versus non-Arctic species in the dataset. Positive values indicate the PFAM occurs  
 840 more frequently than expected in Arctic species; and negative values that the PFAM occurs less  
 841 frequently than expected in Arctic species. The vertical axis shows the  $-\text{log}_{10}$  chi-squared P-values for  
 842 enrichment in expansions of each PFAM, inferred by CAFE, in Arctic compared to non-Arctic species,  
 843 minus the  $-\text{log}_{10}$  chi-squared P-values of contractions in each PFAM in Arctic species, using the same  
 844 methodology. Positive values indicate the PFAM is more frequently expanded in Arctic species and  
 845 negative that it is more contracted in Arctic species than expected. PFAMs that are inferred to either  
 846 be specifically associated (enriched in presence, or expanded) or not associated (contracted) in Arctic  
 847 compared to non-Arctic species ( $P < 10^{-05}$ ) are labelled. One PFAM (PF11999, ice-binding domain)  
 848 showing extreme enrichment in Arctic species is shown off-scale.



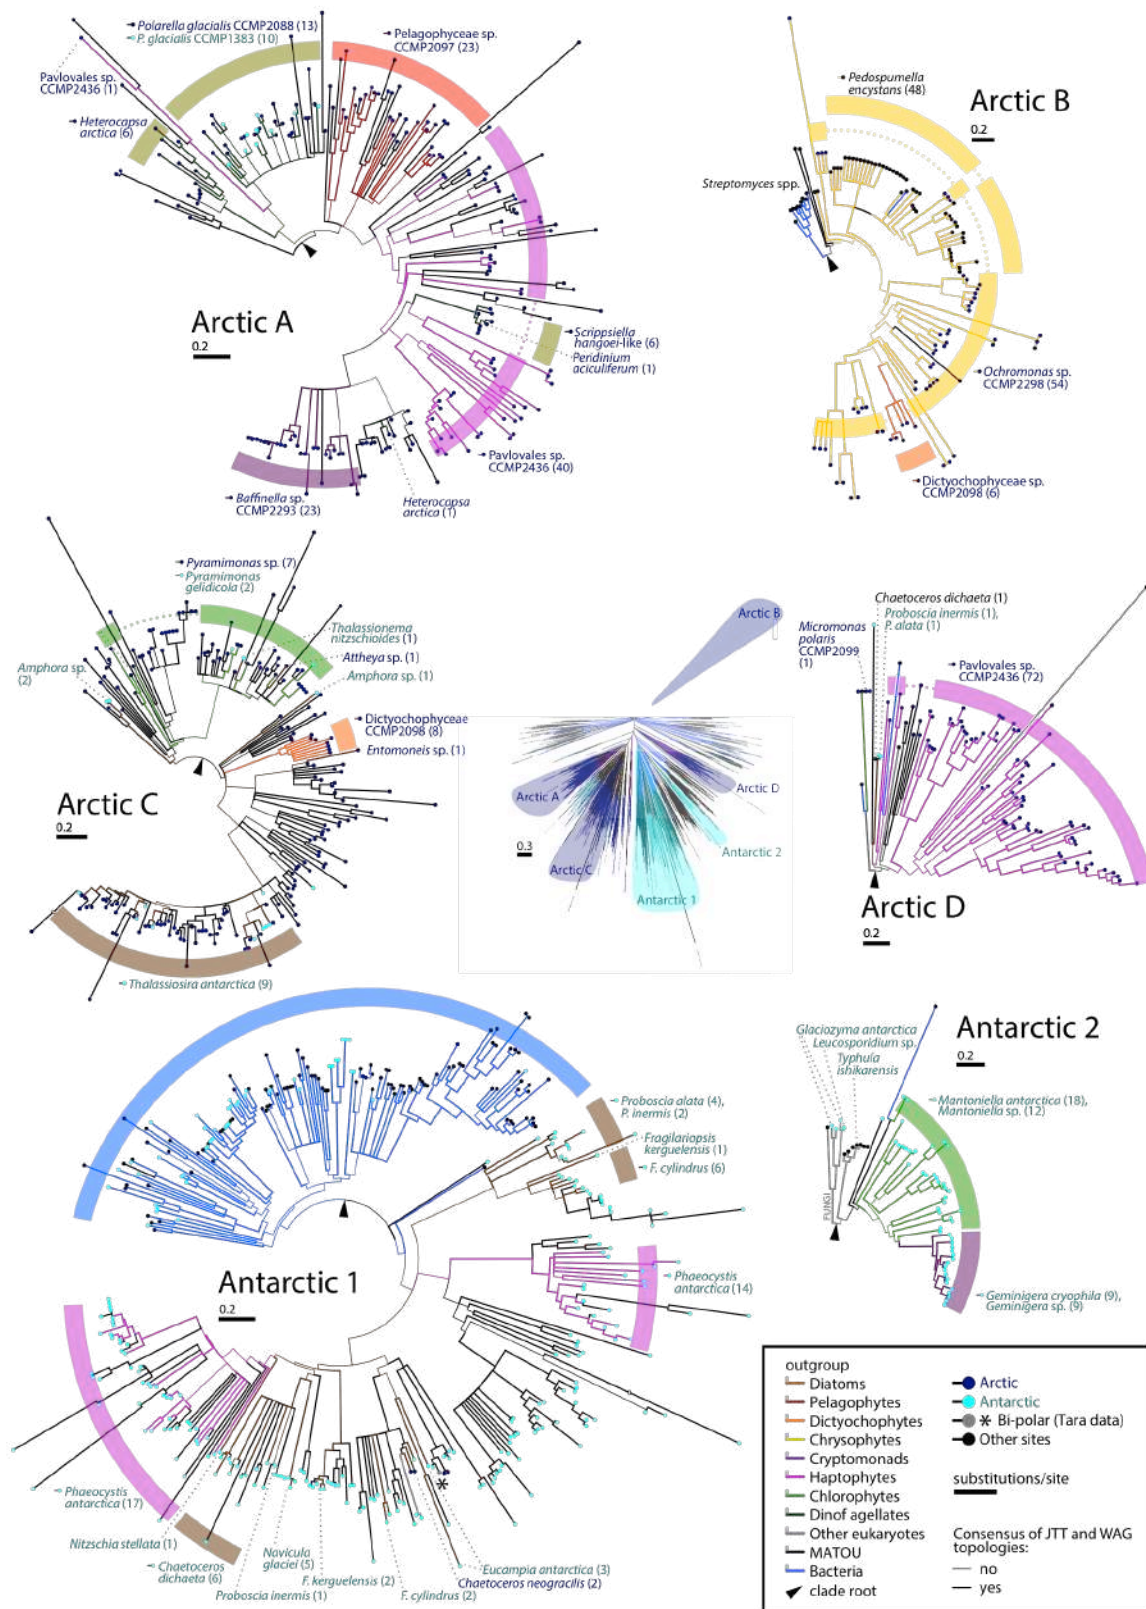

850 **Fig. 5. HGT of ice-binding domain sequences between Arctic algae.** Consensus best-scoring tree  
851 topology obtained with RaxML under JTT and WAG substitution models for a 4862 branchx193 aa  
852 alignment of all ice-binding domain (PF11999) sampled from UniRef, JGI algal genomes, MMETSP,  
853 and *Tara* Oceans. Branches are shaded by evolutionary origin and leaf nodes by biogeography  
854 (either: isolation location of cultured accessions where recorded; or on oceanic regions for which >  
855 70% total abundance of each *Tara* unigene could be recorded). One *Tara* unigene (asterisked) shows  
856 bipolar distributions (> 35% total abundance in both Arctic and Antarctic/ Southern Oceans). Thick  
857 branches indicate presence of a clade in both best-scoring tree outputs. The tree in the centre shows  
858 an overview of the global topology obtained; four clades of algal IBPs with probable within-Arctic  
859 transfer histories and two clades of algal IBPs with probable within-Antarctic IBPs are shown as  
860 magnified circular topologies. Numbers in parentheses identify the number of non-identical branches  
861 (i.e., gene sequences) identified in each named species. The earliest-diverging branch in each clade,  
862 relative to the remaining global tree topology, is marked with an arrow. From these rooting points,  
863 probable horizontal transfer events can be inferred e.g. from monophyletic groups of sequences,  
864 positioned within paraphyletic groups of sequences from a different phylogenetic derivation.

865

866

867

868

869

870

871

872

873

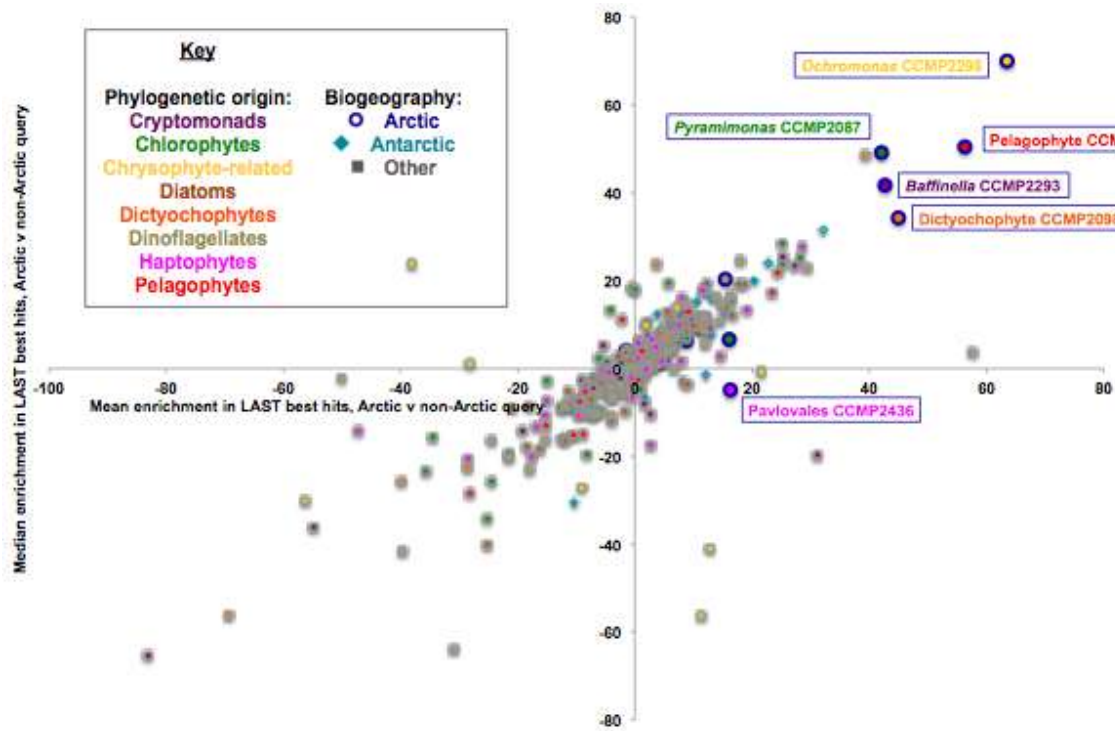

874

875 **Fig. 6. Similarity in Arctic algal genome content inferred by LAST top-hit analysis.** Scatterplot  
876 showing mean (horizontal axis) and median enrichments (vertical axis) in LAST top hits from the  
877 complete genomes of *comparative pairs* of Arctic algal species and phylogenetically equivalent non-  
878 Arctic species, searched across taxon-specific reference libraries from the pan-algal dataset. Species  
879 are shaded by phylogenetic origin (inner colour) and biogeographical origin (outer colour). Five Arctic  
880 species that show strong enrichments in LAST top-hits to other Arctic queries, plus Pavlovales sp.  
881 CCMP2436 which uniquely amongst the four sequenced species does not, are labelled. Deviation  
882 values were calculated as  $(CCMP2097_{obs} - CCMP2097_{exp|Aureococcus}, CCMP2293_{obs} - CCMP2293_{exp|Guillardia},$   
883  $CCMP2436_{obs} - CCMP2436_{exp|Chrysochromulina},$  and  $CCMP2298_{obs} - CCMP2298_{exp|Nannochloropsis}$ ) where “obs”  
884 is the observed number of best hits for a given reference species and “exp” is the expected number  
885 based on linear regression from the number of best hits obtained with the non-Arctic query within  
886 the same comparative pair. Searches between query and reference libraries from the same  
887 taxonomic group were excluded from all calculations.

888

889

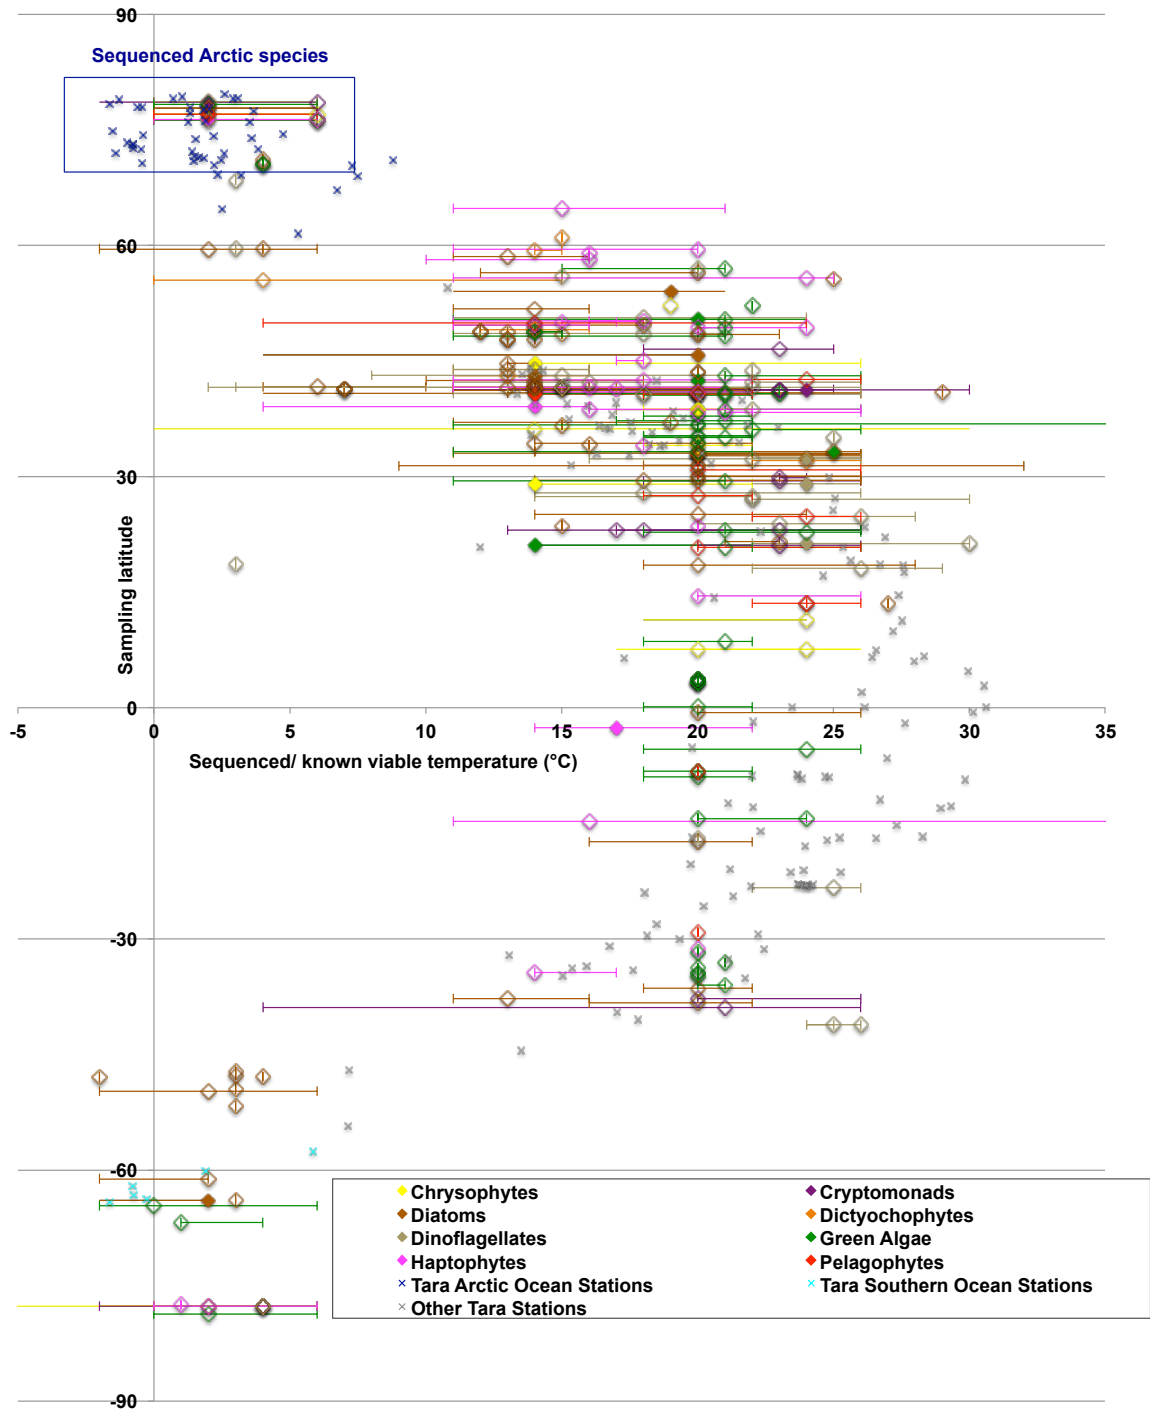

890 **Fig. 1- Figure supplement 1.** Scatterplot of sampled latitude, and growth temperatures, of all  
891 geolocalised algal genomes and transcriptomes within the pan-genomic dataset assembled for this  
892 study. Taxa are shaded by phylogeny and biogeography per Fig. 1. Data were manually verified for  
893 each culture by comparing the synthesis of the genome and transcriptome portal data (Grigoriev et  
894 al., 2021; Keeling et al., 2014) with recorded permissible growth temperatures for each  
895 corresponding culture collection accession, taking into account synonymous strain names housed in  
896 different collections. Tara Oceans data is taken from PANGAEA entries for each station (Pesant et al.,  
897 2015). Growth temperatures are provided as ranges, centred around the experimental temperature  
898 (if recorded) at which the genome or transcriptome library was generated. The Arctic species  
899 sequenced in this study, which are not viable at temperatures > 6C, are surrounded by a blue box.

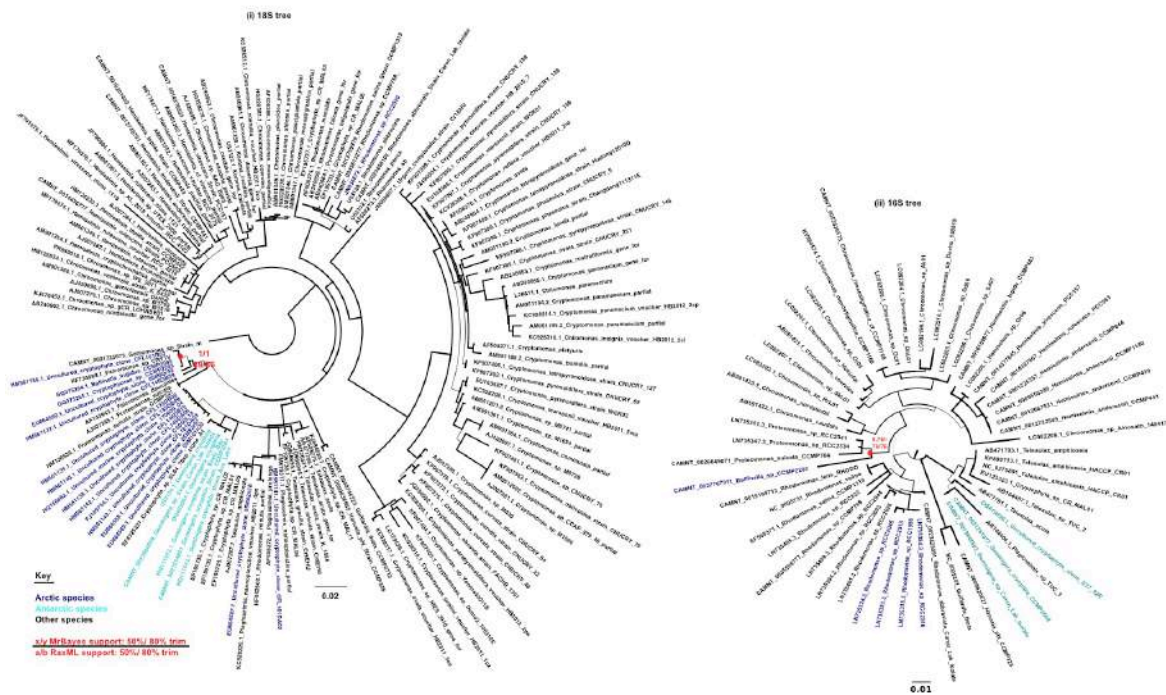

900 **Fig. 1- Figure supplement 2. Phylogenetic position of *Baffinella* sp. CCMP2293 inferred from**  
901 **cultured 18S sequences.** This figure shows the consensus topologies inferred for (left) a 143 taxa x  
902 1699 nt 18S rDNA alignment and (right) a 53 taxa x 1178 nt alignment of all cryptomonad NCBI and  
903 MMETSP sequences, trimmed to 80% occupancy. The 18S tree is rooted on a *Goniomonas* outgroup  
904 (Cenci et al., 2018) and the 16S tree on the midpoint. Thick branches indicate clade presence in both  
905 MrBayes consensus trees obtained. Leaf nodes are shaded by biogeographical origin. MrBayes  
906 consensus and RAxML best-scoring tree values retrieved for nodes unifying *Baffinella* sp. CCMP2293  
907 with a clade of mainly Arctic cryptomonads, including the conspecific CCMP2045 (Daugbjerg et al.,  
908 2018), and with the genus *Proteomonas*, are shown with red circles.

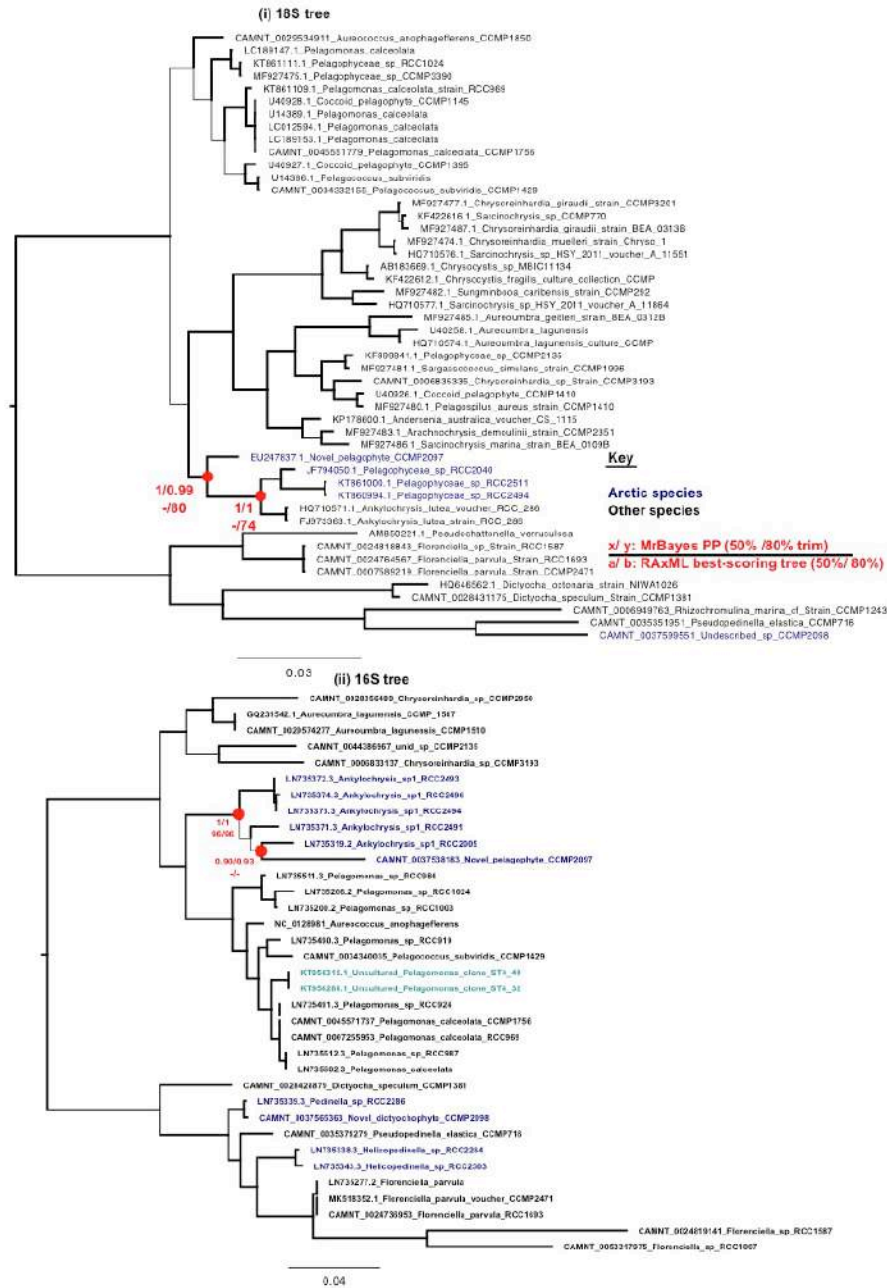

909

910 **Fig. 1- Figure Supplement 3.** Phylogenetic position of the novel pelagophyte CCMP2097 inferred  
 911 from cultured 18S and 16S sequences. Consensus MrBayes and RAxML topologies realised for (i) a 55  
 912 taxa x 1648 nt 18S alignment; and (ii) a 35 taxa x 819 nt 16S alignment of pelagophyte and  
 913 dictyochophyte NCBI and MMETSP 18S sequences, rooted between pelagophytes and  
 914 dictyochophytes (Dorrell et al., 2021a), and trimmed to 80% occupancy. Thick bars indicate clade  
 915 recovery in all tree topologies. Leaf nodes are shaded by biogeographical origin. Support values for  
 916 nodes, placing CCMP2097 at within a predominantly Arctic clade including the genus *Ankylochrysis*  
 917 (Han et al., 2018), are shown with red circles.

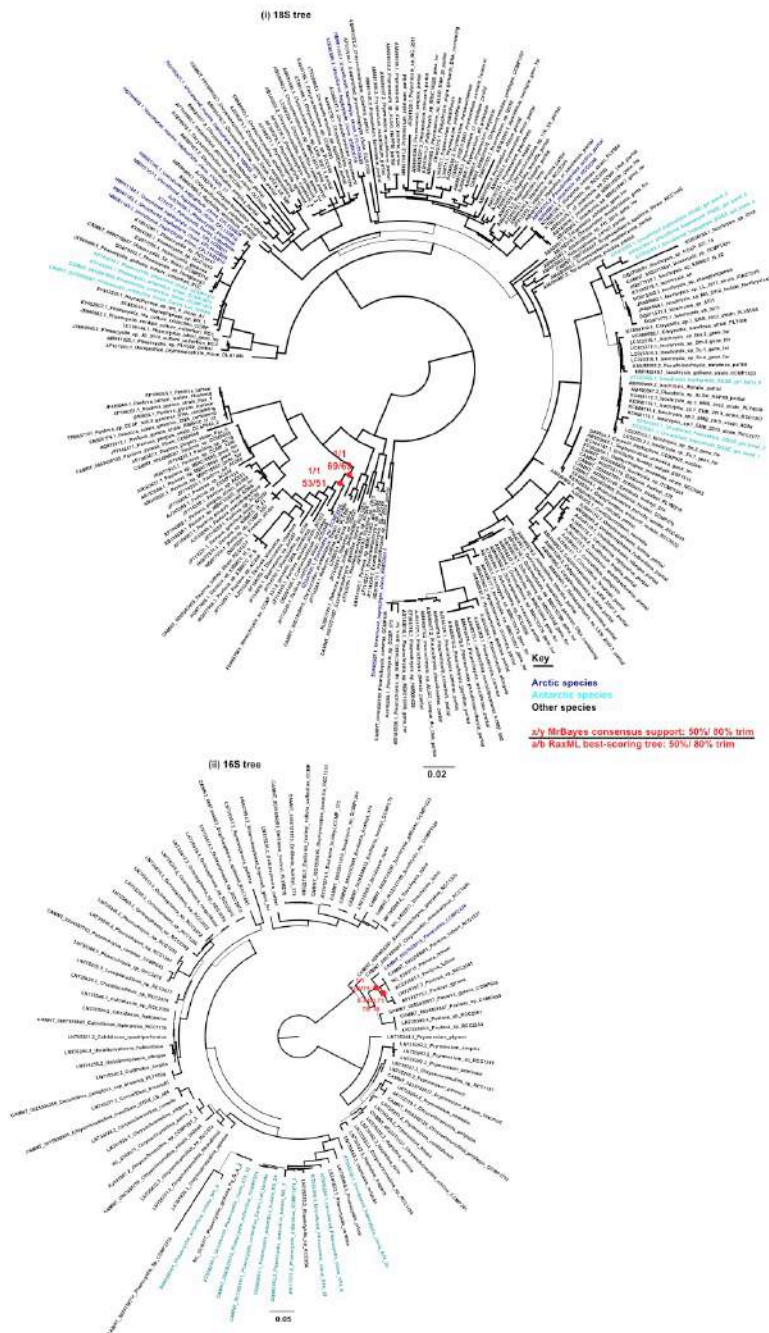

918

919 **Fig. 1- Figure supplement 4. Phylogenetic position of Pavlova sp. CCMP2436 inferred from**  
920 **cultured 18S and 16S sequences.** Consensus MrBayes and RAXML topologies inferred for (i) a 241  
921 taxa x 1679 nt 18S alignment and (ii) a 94 taxa x 846 nt 16S alignment of NCBI and MMETSP  
922 haptophyte trimmed to 80% occupancy and rooted on the split between pavlovophyte and  
923 prymnesiophyte sequences (Bendif et al., 2011). Thick branches indicate recovery of a clade in both  
924 tree topologies. Leaf nodes are shaded by biogeographical origin. Support values for two nodes  
925 realised using MrBayes and RAXML, which place CCMP2436 as an isolated basal member of the  
926 pavlovophytes, and related to the otherwise non-Arctic genus *Diacronema* sensu lato, are indicated  
927 with red circles.

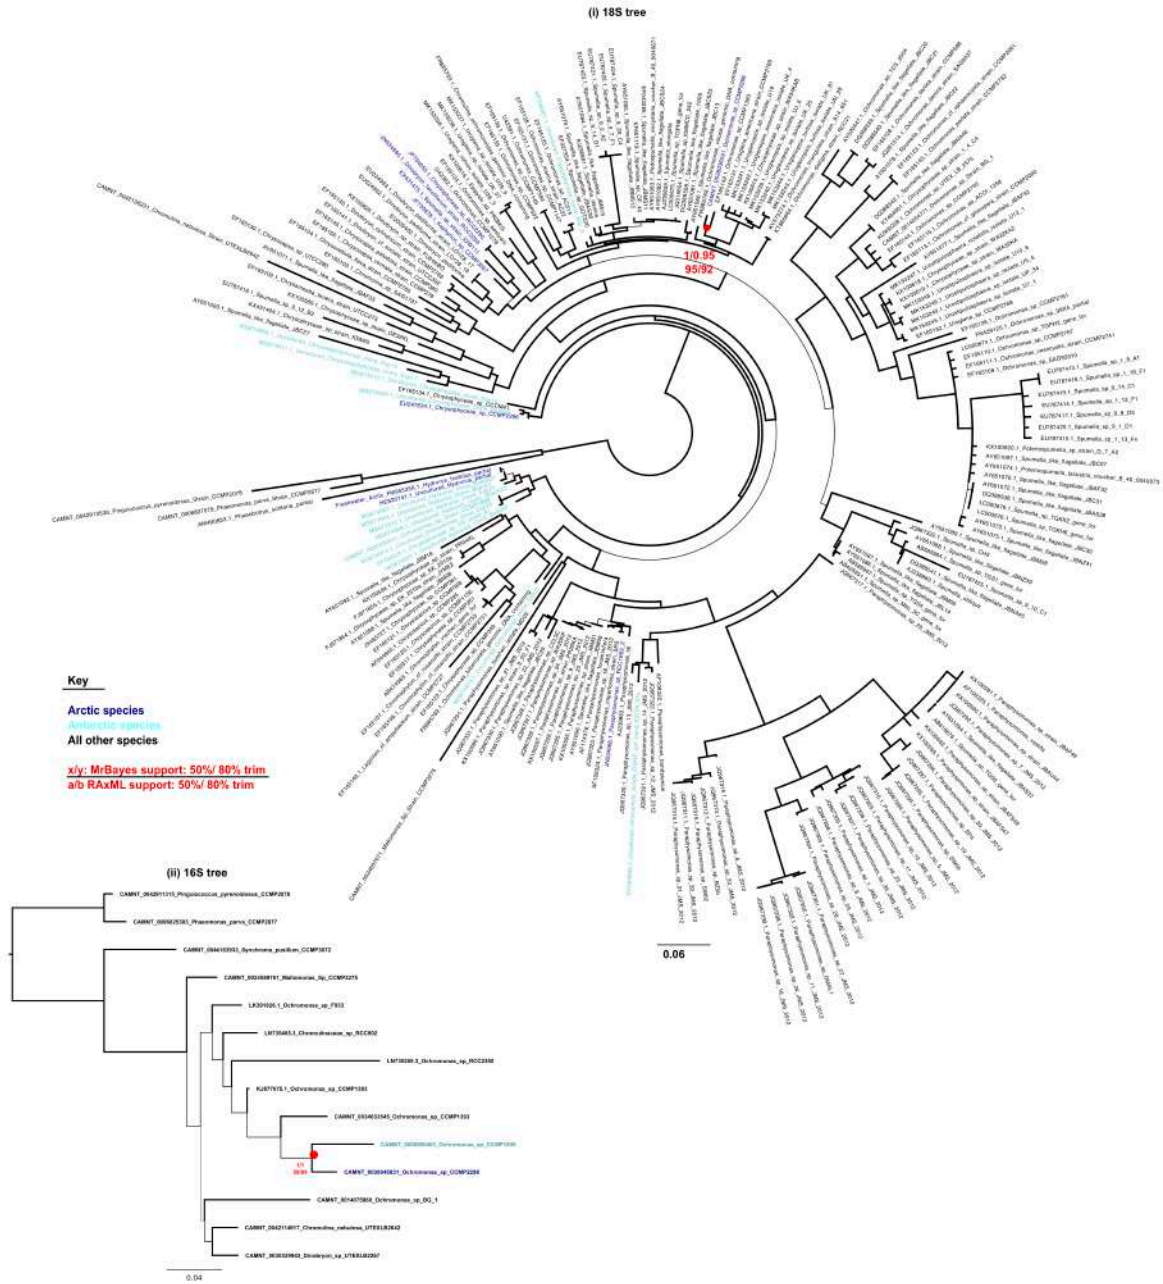

928 **Fig. 1- Figure Supplement 5. Phylogenetic position of *Ochromonas* CCMP2298 inferred from**  
 929 **cultured 18S and 16S sequences.** Consensus MrBayes and RAxML topology resolved for (top) a 219  
 930 taxa x 1636 nt alignment for NCBI and MMETSP 18S rDNA sequences from and (bottom) a 15 taxa x  
 931 1383 nt alignment (trimmed to remove sites with <80% occupancy) of chrysophytes, synurophytes,  
 932 and a pinguiphyte outgroup (Dorrell et al., 2021a). Thick branches indicate presence of a node in  
 933 the MrBayes consensus and RaXML best-scoring tree topology. Leaf nodes are shaded by  
 934 biogeographical origin. Consensus values retrieved for one node linking CCMP2298 to the mesophilic  
 935 *Ochromonas* sp. CCMP1393 (18S) and to *Ochromonas* sp. CCMP1899 (16S) in trees calculated with  
 936 alignments trimmed to 50% and 80% occupancy are shown with red circles.



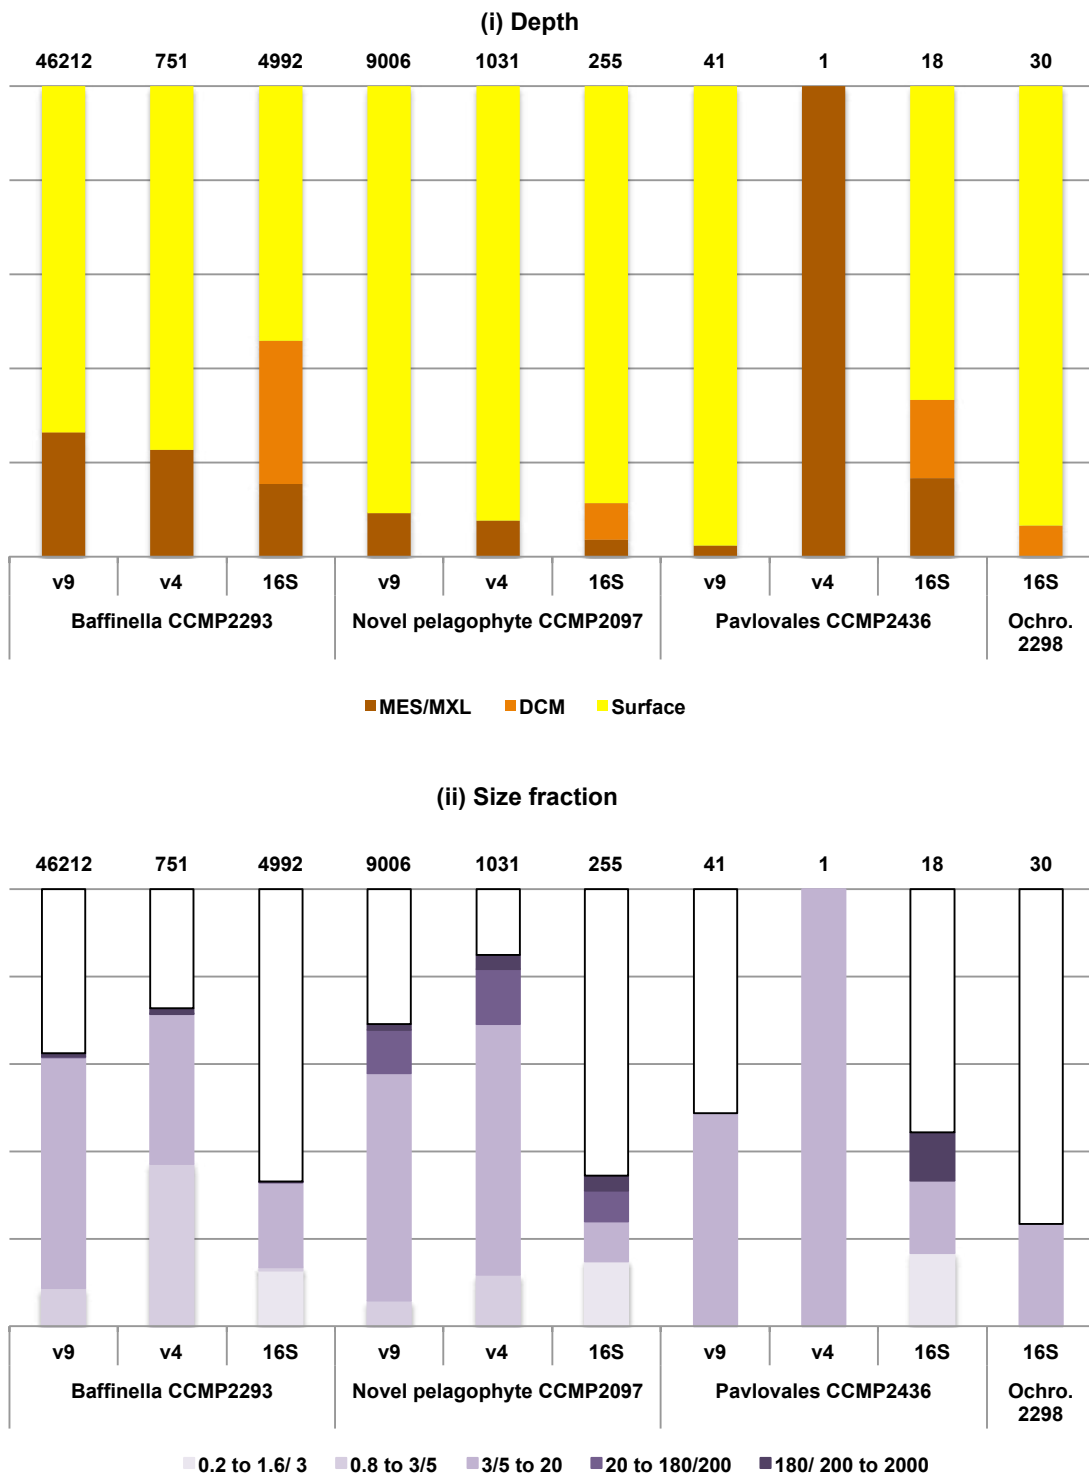

937 **Fig. 2- Figure Supplement 1. Total read counts of *Tara* Oceans ribotypes phylogenetically resolved**  
 938 **to be closely related to Arctic native species:** divided by (i) depth (either surface, deep chlorophyll  
 939 maximum, or mesopelagic/ mixed layer), and (ii) size fraction. Each species is predominantly  
 940 distributed in surface waters, small (3-5/ 20  $\mu$ m) size fractions, and Arctic stations. The total numbers  
 941 of reconciled ribotypes are shown on the above each plot. Samples with no mapped ribotypes  
 942 (*Ochromonas* sp. CCMP2298 was not detected in 18S v4 or 18S v9 ribotype data hence these values  
 943 are not shown).

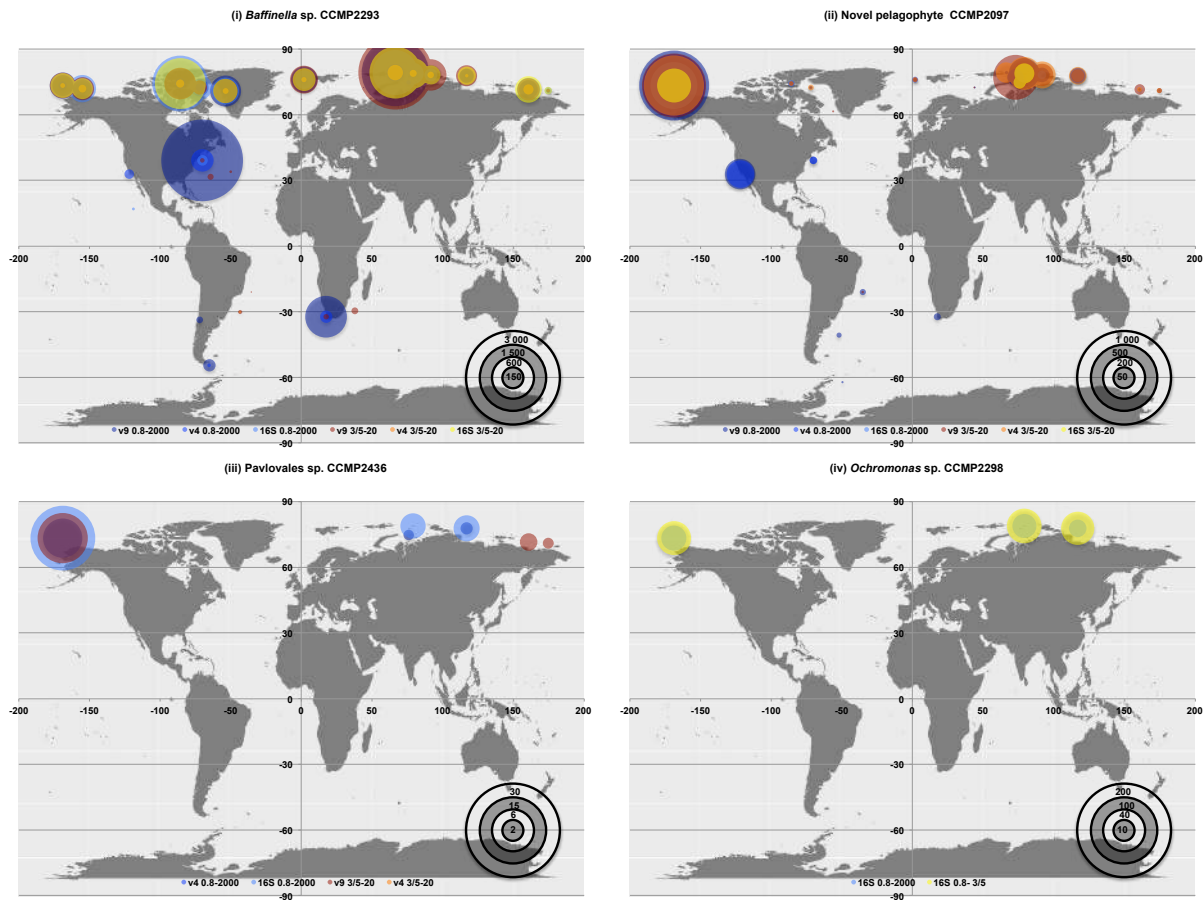

944 **Fig. 2- Figure Supplement 2. Relative abundances (expressed as parts per million) of 18S v4, 18S v9**  
945 **and 16S v4v5 ribotypes of Arctic isolated algae: (A) *Baffinella* sp. CCMP2293, (B) novel pelagophyte**  
946 **CCMP2097, (C) *Pavlova* sp. CCMP2436 and (D) *Ochromonas* sp. CCMP2298; calculated from the**  
947 **Tara Oceans and Tara Oceans Polar Circle expeditions. Ribotypes corresponding to each species were**  
948 **identified by BLASTn (threshold similarity 97%) followed by phylogenetic reconciliation to cultured**  
949 **accessions; and abundance calculations are shown for surface samples and size fractions (0.8- 2000**  
950 **and 3/5-20  $\mu$ m) in which the greatest number of corresponding OTUs were counted.**

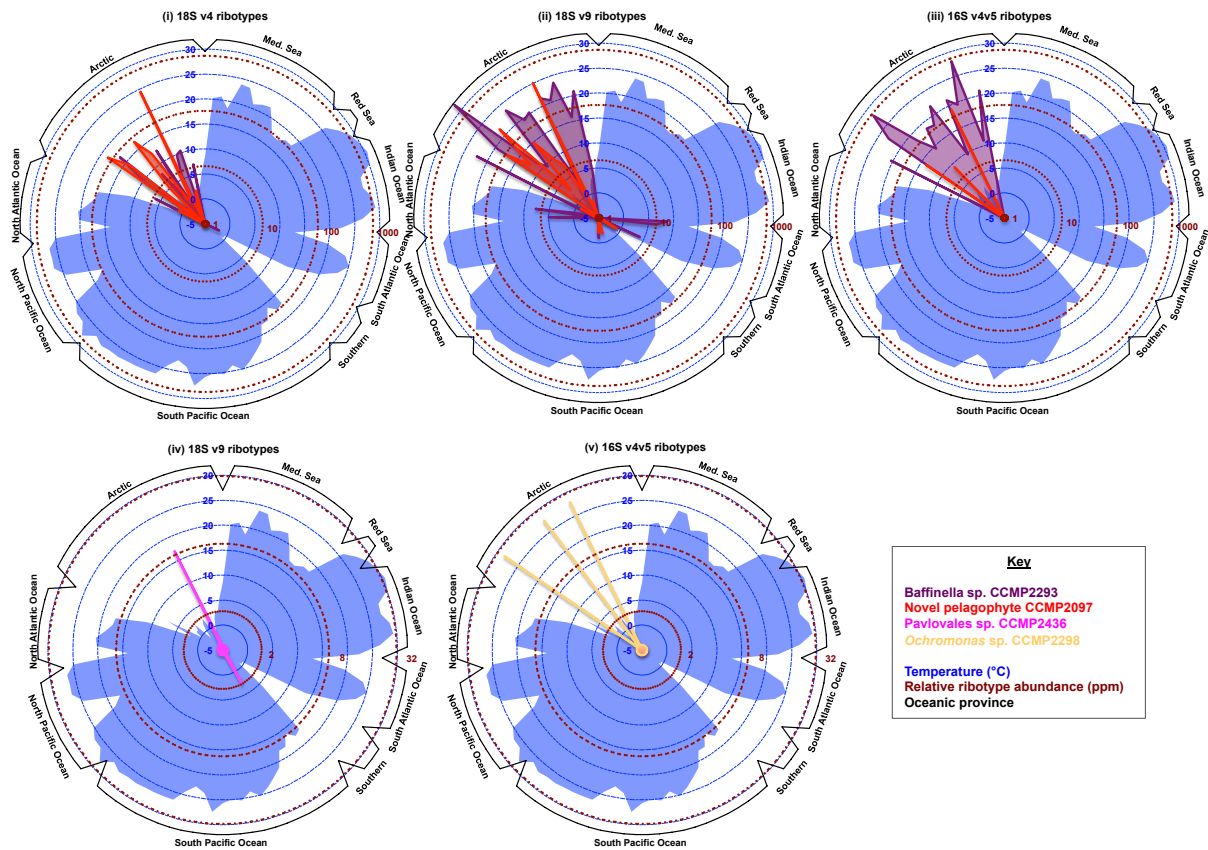

951 **Fig. 2- Figure Supplement 3. Cold water preferences of Arctic native algae.** This figure shows radar  
 952 plots of the relative abundances of (i-iii) *Baffinella* sp. CCMP2293 and the novel pelagophyte  
 953 CCMP2097; (iv) *Pavlova* sp. CCMP2436 and (v) *Ochromonas* sp. CCMP2298 in the 3/5-20  $\mu$ m size  
 954 fraction and surface samples of Tara Oceans station, divided by station provenance, and compared to  
 955 environmental temperature. All four species show strong localisation preferences to cold stations in  
 956 the Northern hemisphere (i.e. the Arctic Ocean) without an equivalent enrichment in cold Southern  
 957 Ocean stations.

958

959

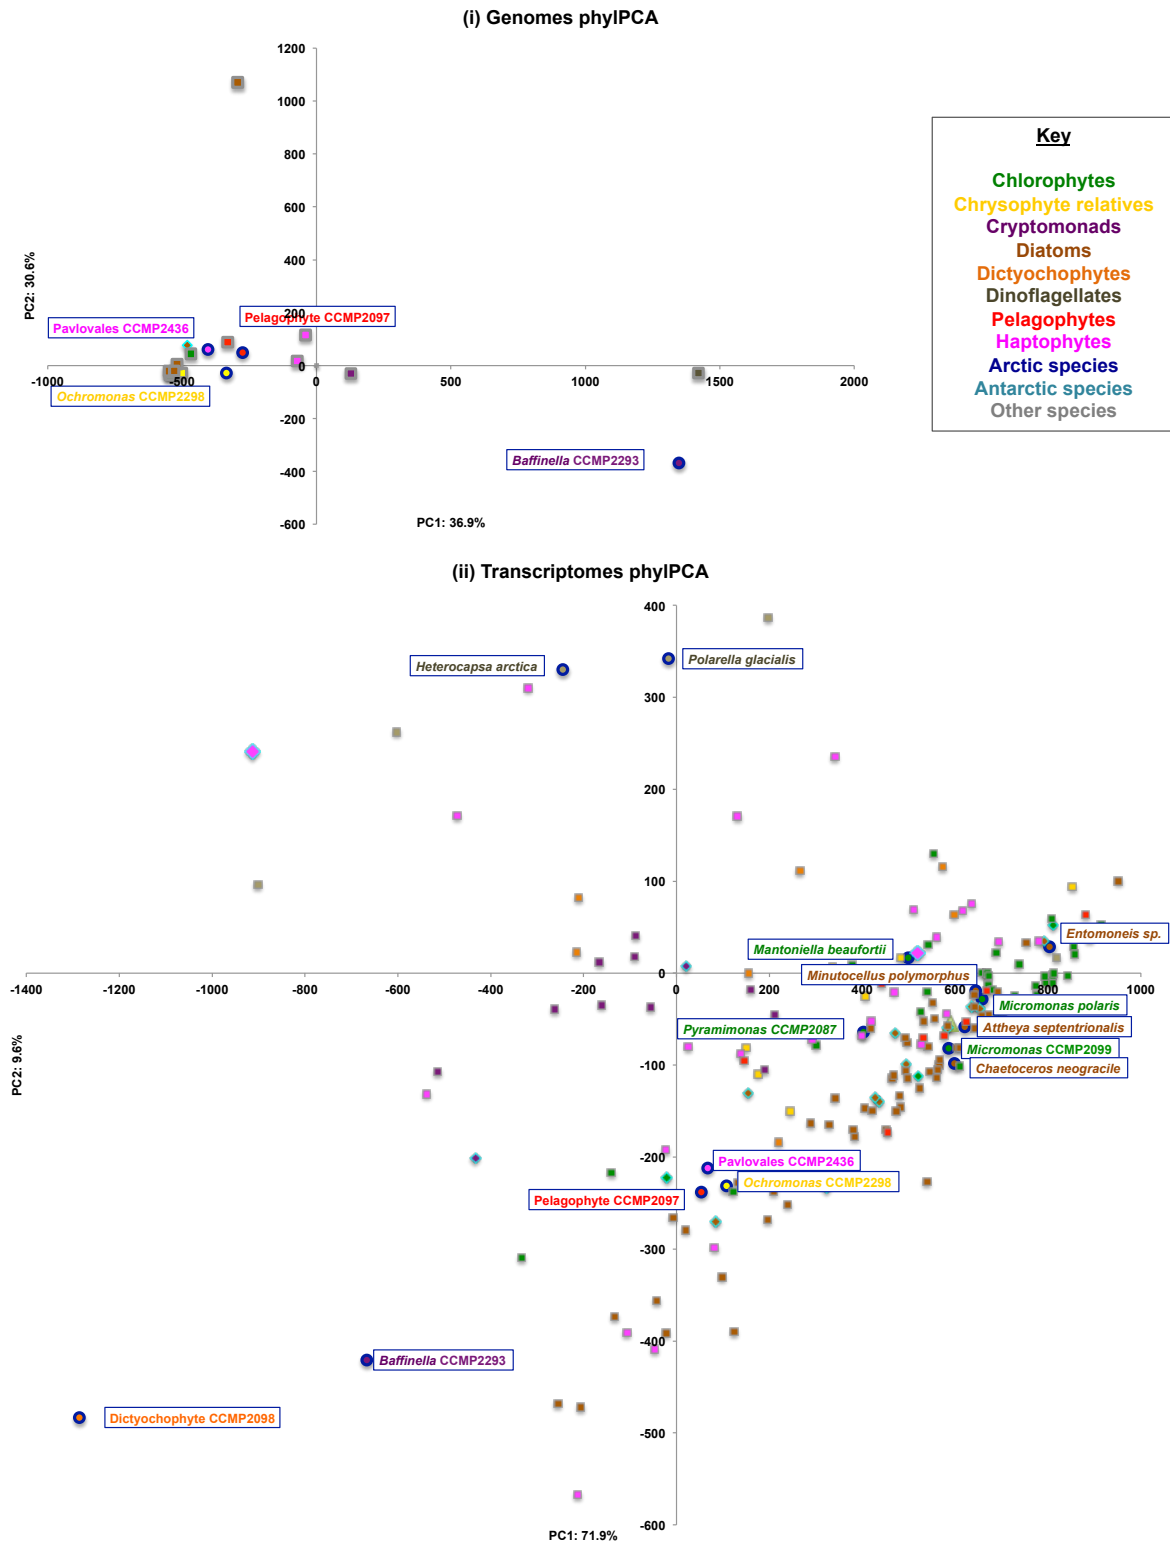

960 **Fig. 3- Figure Supplement 1. Phylogenetically-aware principal component analyses of PFAM**  
 961 **content in the pan-algal dataset, separately realised (i) for genome and (ii) for transcriptome data.**  
 962 Full coordinate values are provided in Table S2, sheet 6. Each coordinate point is coloured by  
 963 phylogeny (fill) and biogeographical origin (line). The all other Arctic species in the datasets are  
 964 labelled.

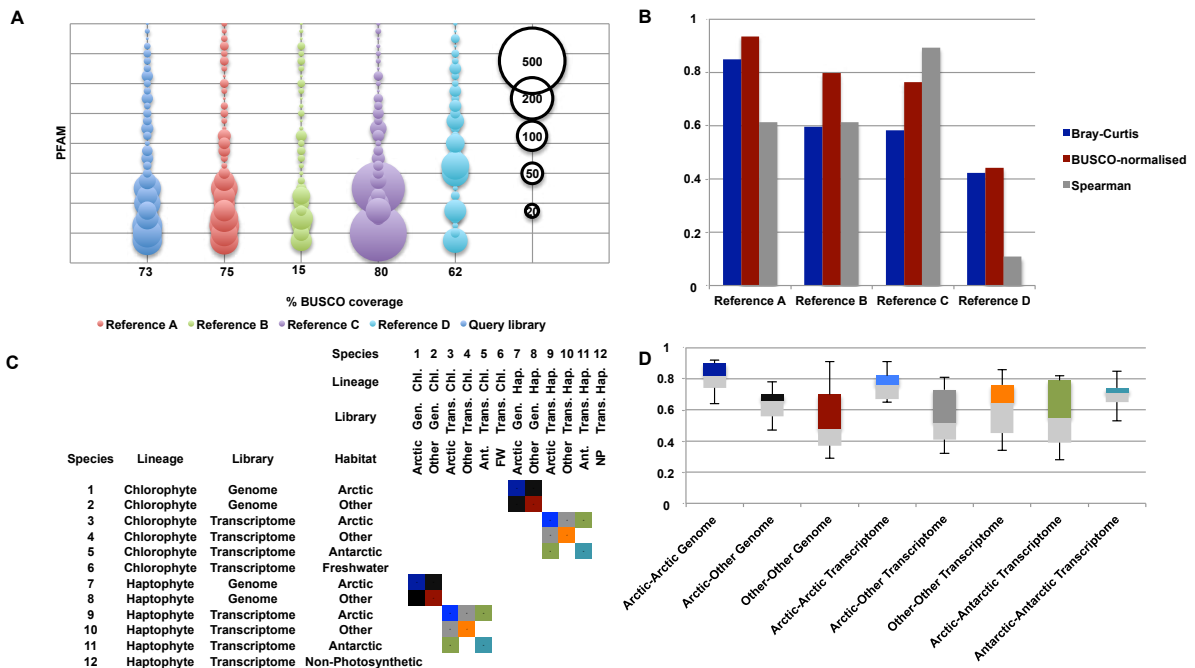

966 **Fig. 3- Figure Supplement 2. Exemplar calculations of PFAM convergence.** **A:** bubble plot showing  
 967 the distribution of 30 PFAMs in five hypothetical libraries. The query library is convergent to  
 968 Reference A; Reference B is also convergent, but fragmented; Reference C is also convergent, but  
 969 with specific expansions in individual PFAMs; and Reference D is non-convergent. **B:** calculated Bray-  
 970 Curtis, BUSCO-normalised shared PFAM, and Spearman correlation values between the query library  
 971 and References A-D. **C:** exemplar heatmap of pairwise comparisons between 12 libraries, and **D:** the  
 972 convergence calculations made between them, shaded per the sampled intersecting cells in the  
 973 heatmap. Of note, comparisons within individual lineages, between genomes and transcriptomes,  
 974 and involving either freshwater or non-photosynthetic species were excluded to minimise latitude-  
 975 independent biases on PFAM convergence estimates.

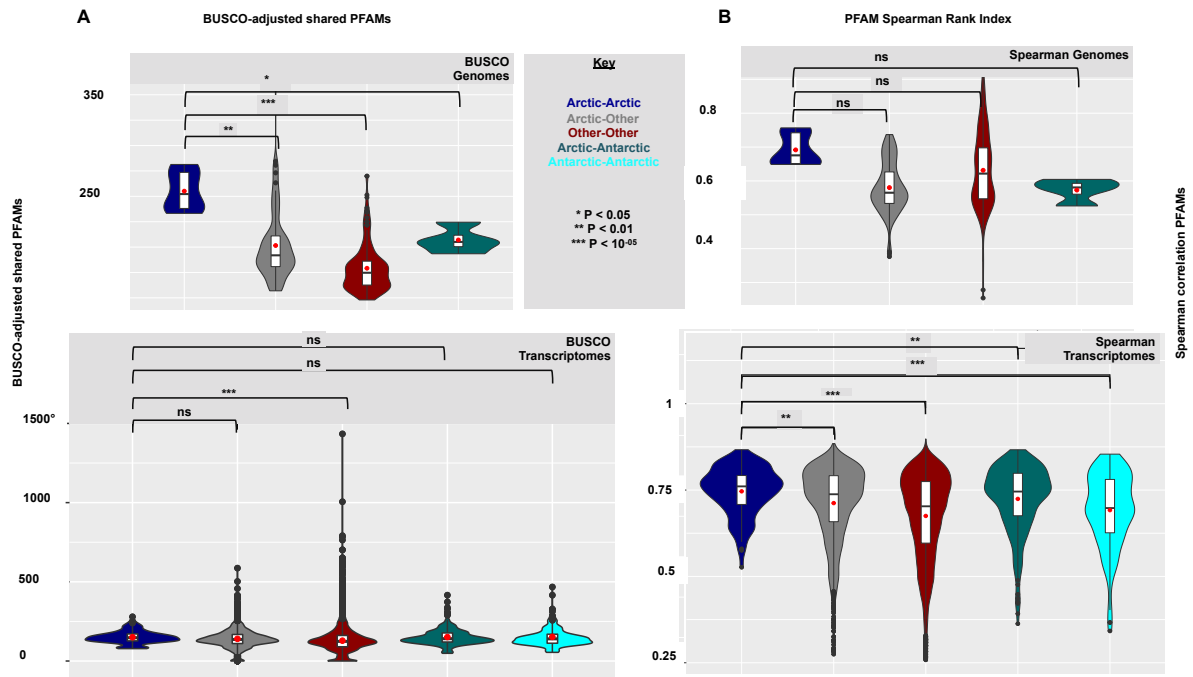

976

977

**Fig. 3- Figure Supplement 3. Alternative metrics for identification of Arctic-Arctic PFAM**

978

**convergences. A:** violin plot of pairwise numbers of total number of shared PFAMs normalised on %

979

recovered complete (single or duplicated) eukaryotic BUSCOs, and **B:** violin plot of Spearman

980

correlation coefficients between PFAM distributions; from Arctic, Antarctic and other algal genomes

981

(top) and transcriptomes (bottom) within the pan-genomic dataset. Violin plots are shown as per Fig.

982

3. Comparisons between members of the same taxonomic group, and involving either freshwater or

983

obligately non-photosynthetic species were excluded from the analyses. Genomic calculations

984

involving Antarctic species are not shown due to the presence of only one Antarctic genome

985

(*Fragilariopsis cylindrus*) in the global dataset. Significance values of one-way ANOVA tests of the

986

separation of means (red dots) are provided between Arctic-Arctic species pairs, and all other forms

987

of species pairs considered.

988

989

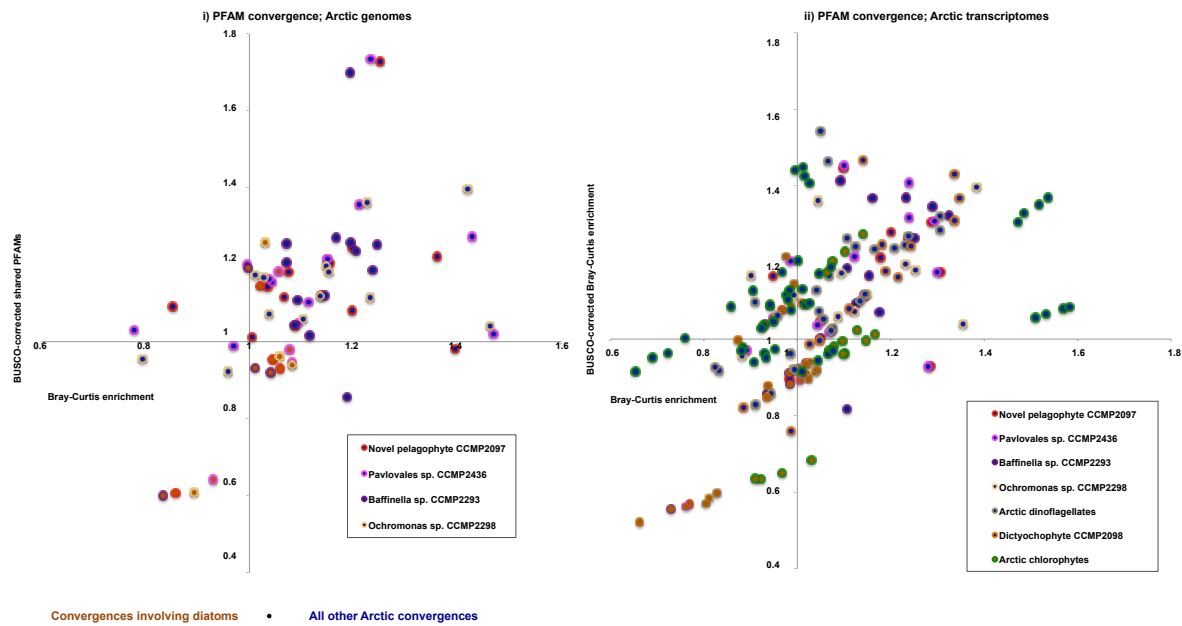

990 **Fig. 3- Figure Supplement 4. Convergences in Arctic PFAM content principally involve non-diatom**  
 991 **taxa.** This figure shows scatterplots of showing crude anti-Bray-Curtis values (horizontal axis), and  
 992 BUSCO-normalised numbers of shared PFAMs (vertical axis), for similarity in PFAM content between  
 993 different pairs of Arctic species in the pan-genomic dataset. Each value consists of the convergence  
 994 value between a given Arctic query species and another Arctic reference, normalised against the  
 995 mean Bray-Curtis or BUSCO-normalised Bray-Curtis value calculated between the query species  
 996 against all non-Arctic species belonging to the same algal lineage as the reference. Values of >1  
 997 indicate a potential convergence in the PFAM content of pairs of Arctic species compared to  
 998 phylogenetically equivalent references. Plots (i) and (ii) show respectively PFAM convergences  
 999 involving query Arctic genomes; and PFAM convergences involving query Arctic transcriptomes from  
 1000 seven algal groups (chlorophytes, chrysophytes, cryptomonads, dictyochophytes, dinoflagellates,  
 1001 haptophytes and pelagophytes). The outer colour of each point is shaded by the taxonomic origin of  
 1002 the query species as per Fig. 1. The inner colour of each point is shaded by the taxonomic origin of  
 1003 the reference species: convergences involving diatom references are shaded brown, and  
 1004 convergences involving all other reference lineages are dark blue. In each plot, while multiple  
 1005 combinations of query and reference Arctic species are observed to have normalised convergence  
 1006 values > 1, suggesting Arctic-Arctic convergences, combinations involving diatom references  
 1007 strikingly have normalised reference values close to 1, or even less than 1, suggesting limited  
 1008 convergence in PFAM content between Arctic diatoms and other Arctic algal groups.

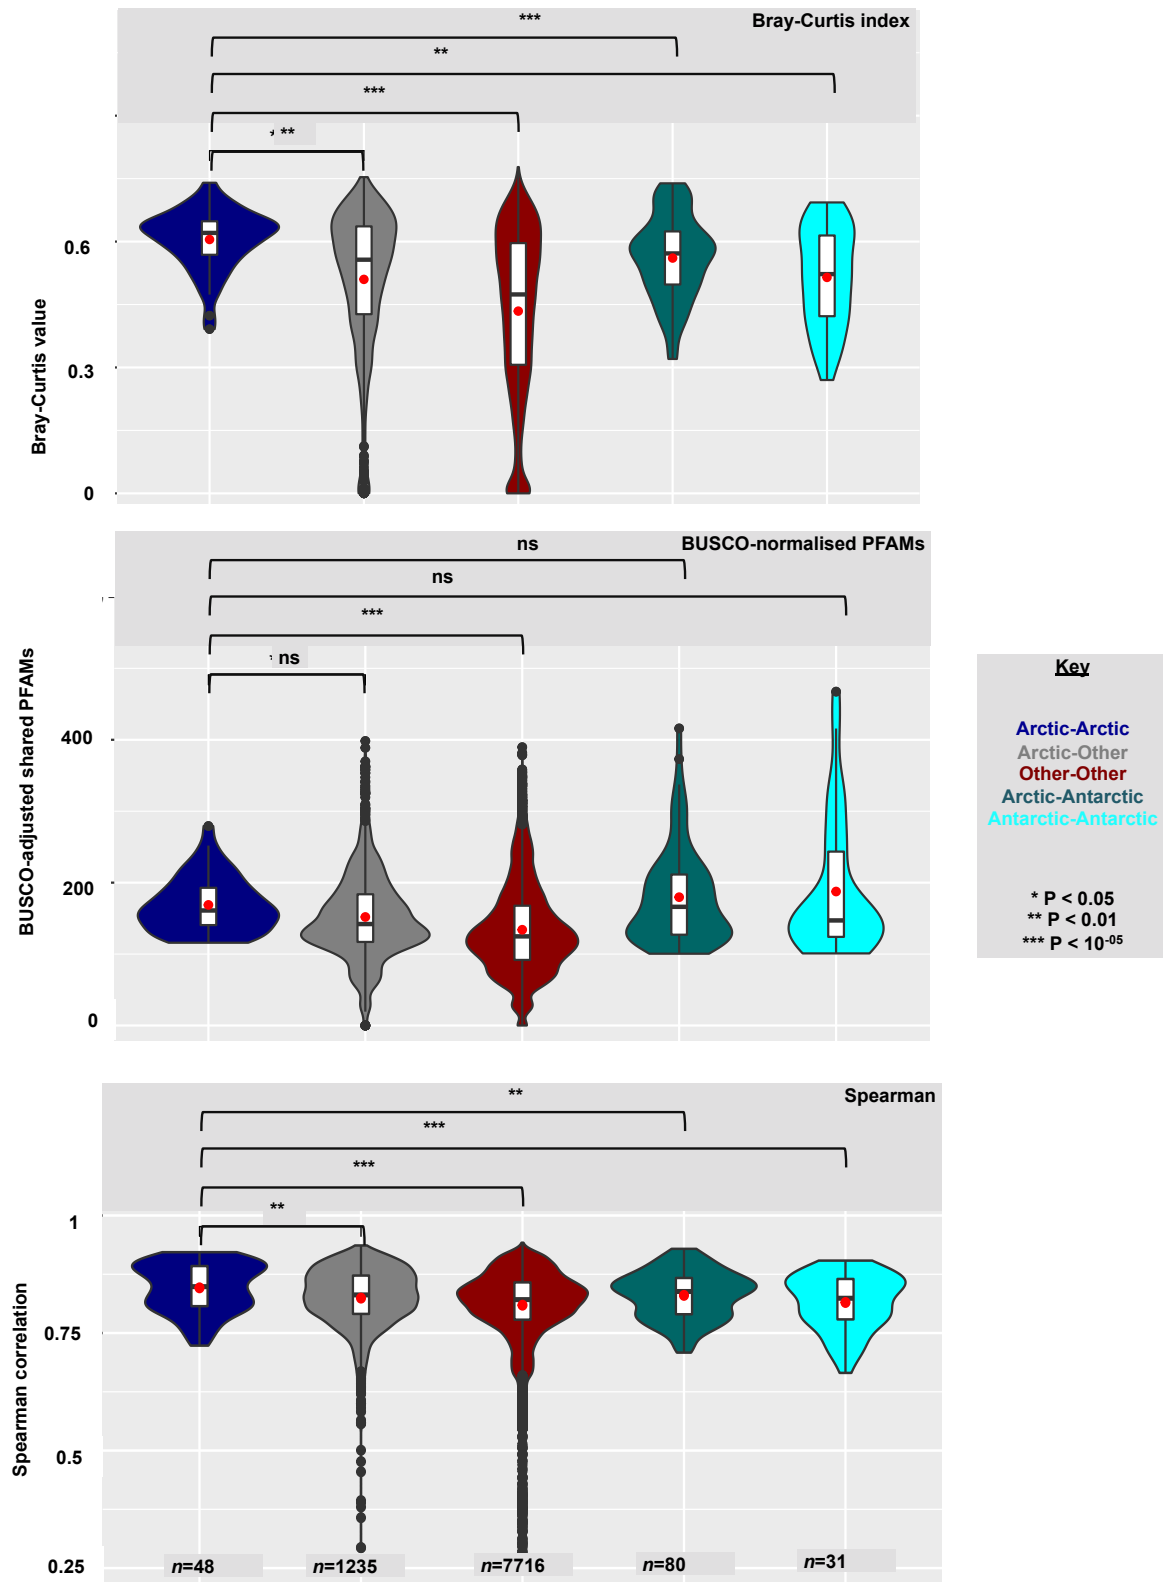

1009 **Fig. 3- Figure Supplement 5. Violin plots of Arctic-Arctic convergence indices across transcriptome**  
 1010 **datasets exclusive of diatoms.** Violin plots are shown as per Fig. 3. Diatom-exclusive genome plots  
 1011 are not shown due to the absence of Arctic diatom genomes from the pan-algal dataset.

1012



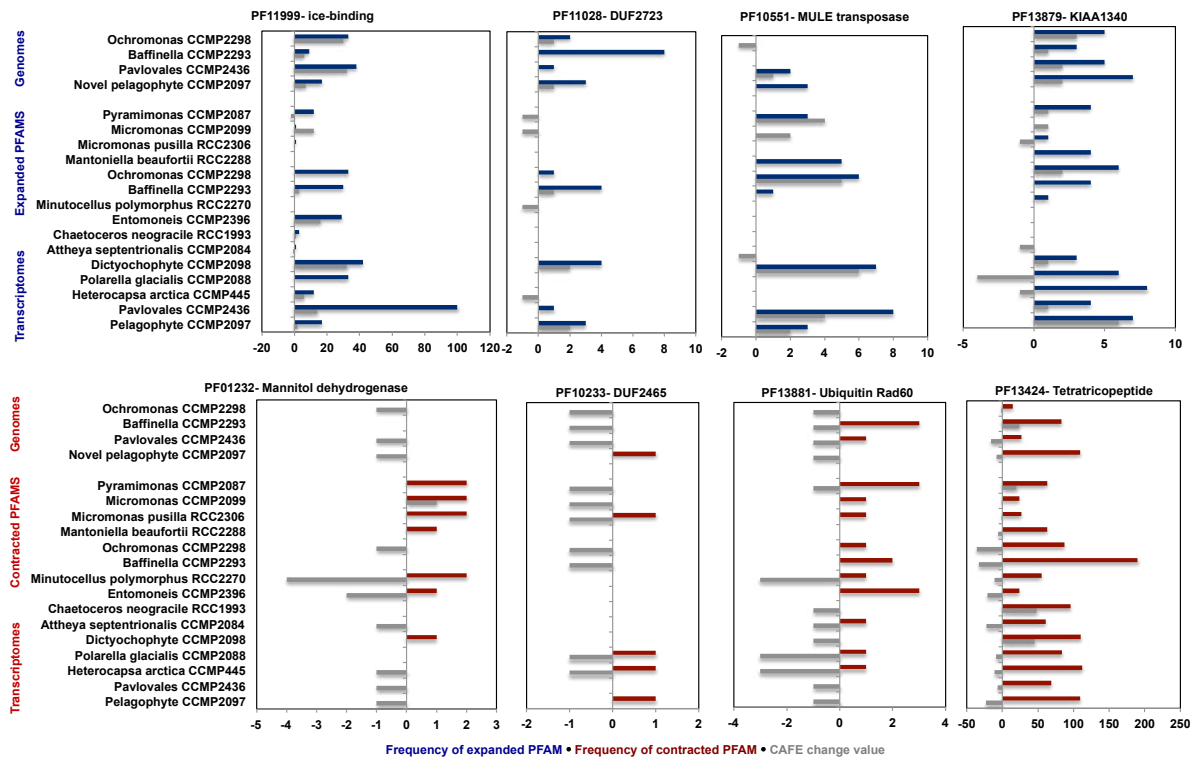

1014 **Fig. 4- Figure Supplement 1. Bar plots showing (coloured bars) the total number and (grey bars)**  
 1015 **CAFE scores, across all studied Arctic species, for four PFAMs (blue) inferred to be significantly more**  
 1016 **frequently expanded and four PFAMs (red) significantly more contracted (one-tailed chi-squared**  
 1017 **test,  $P < 10^{-5}$ ) in Arctic compared to non-Arctic species across the pan-algal dataset.**

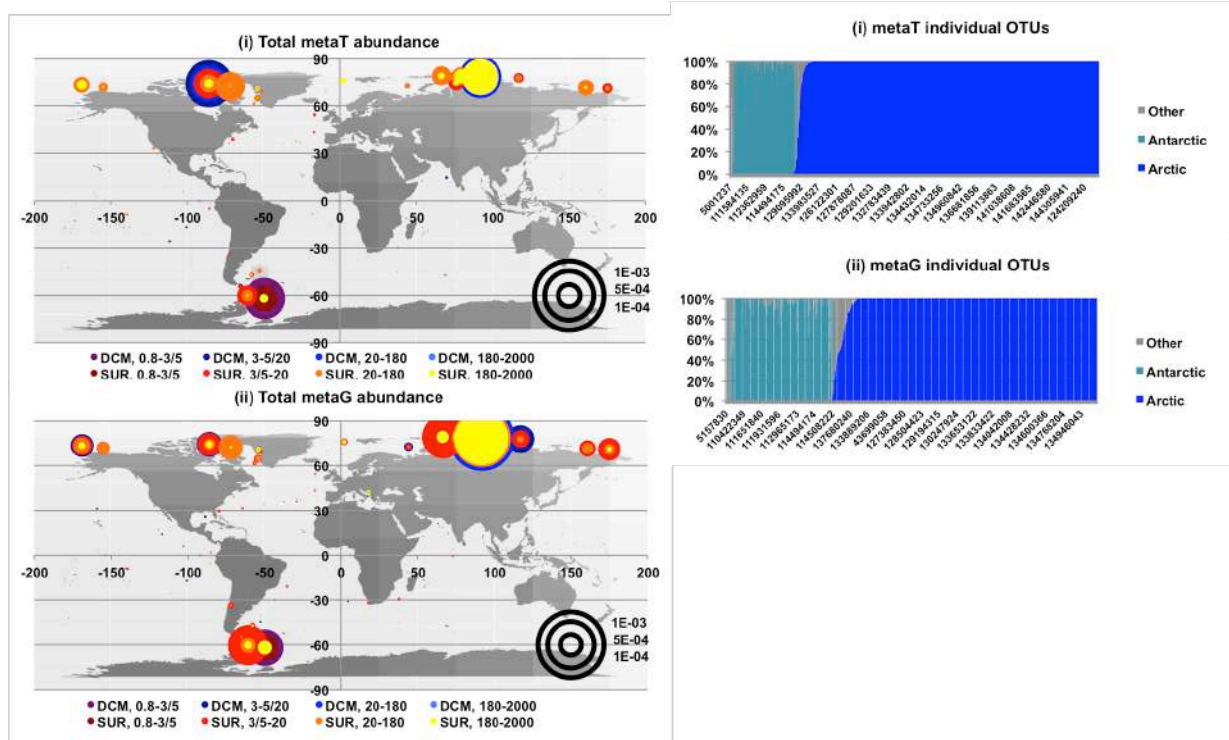

1018

1019 **Fig. 5- Figure Supplement 1. Environmental distributions of ice-binding domains in *Tara* Oceans**  
 1020 **data.** (Left) global distribution plots, and (right) bar charts of individual proportional abundances of  
 1021 ice-binding domain (PF11999) containing sequences in (i) *Tara* Oceans meta-transcriptome and (ii)  
 1022 meta-genome sequence data, including the *Tara* Polar Circle survey. Stations are classified into Arctic  
 1023 (>60N), Antarctic (>55S) and Other latitudes, per Fig. 2. IBD-containing meta-genes show  
 1024 predominantly polar distributions, which are typically either restricted to the Arctic or Antarctic  
 1025 stations sampled, with only 4/ 1711 sampled meta-genes represented by >35% of their total global  
 1026 abundance in both Arctic and Antarctic libraries.

1027

1028

1029

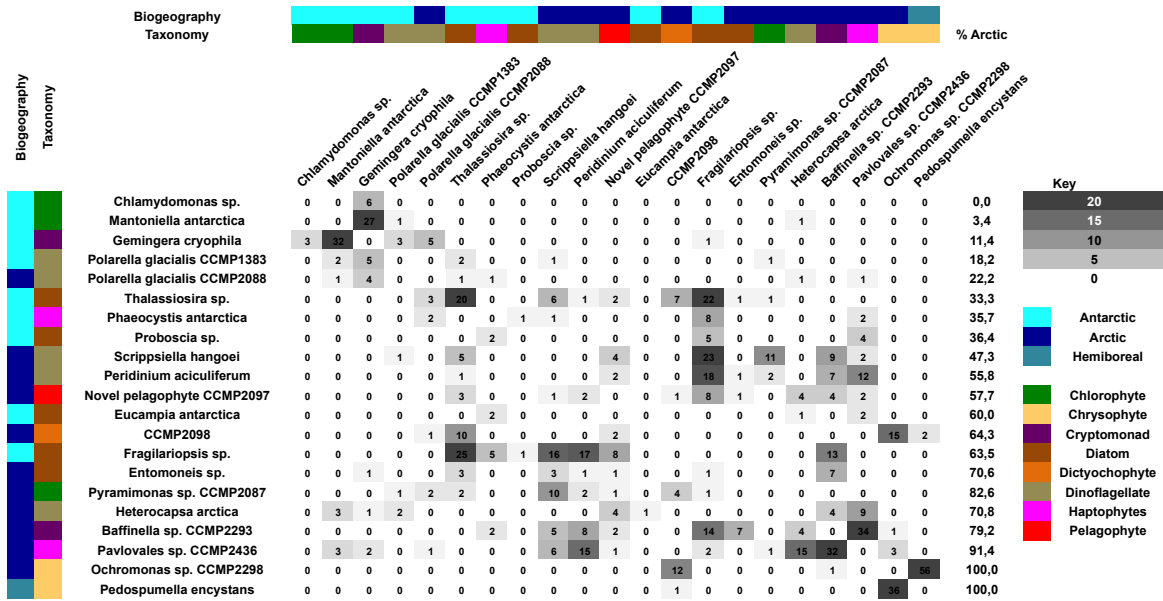

1030

1031 **Fig. 5- Figure Supplement 2. . Internal BLAST best hit searches within the IBD alignment.** This figure  
 1032 shows the number of times each Arctic- and Antarctic-native eukaryotic algae either retrieves, or is  
 1033 retrieved, as the best-scoring (lowest e-value) hit in a BLASTp search of the IBD alignment against  
 1034 itself (Table S3, sheets 3, 8, 9), excluding hits to members of the same genus (with *Scrippsiella* and  
 1035 *Peridinium* treated as congeneric; 38) and Tara Oceans meta-genes. Sequences are shaded by  
 1036 taxonomy and biogeography as per Fig. 5, and are ranked in ascending order of the % of best-hits  
 1037 retrieved that are to Arctic eukaryotic algae. Species with fewer than three IBD sequences in the final  
 1038 alignment are not shown.

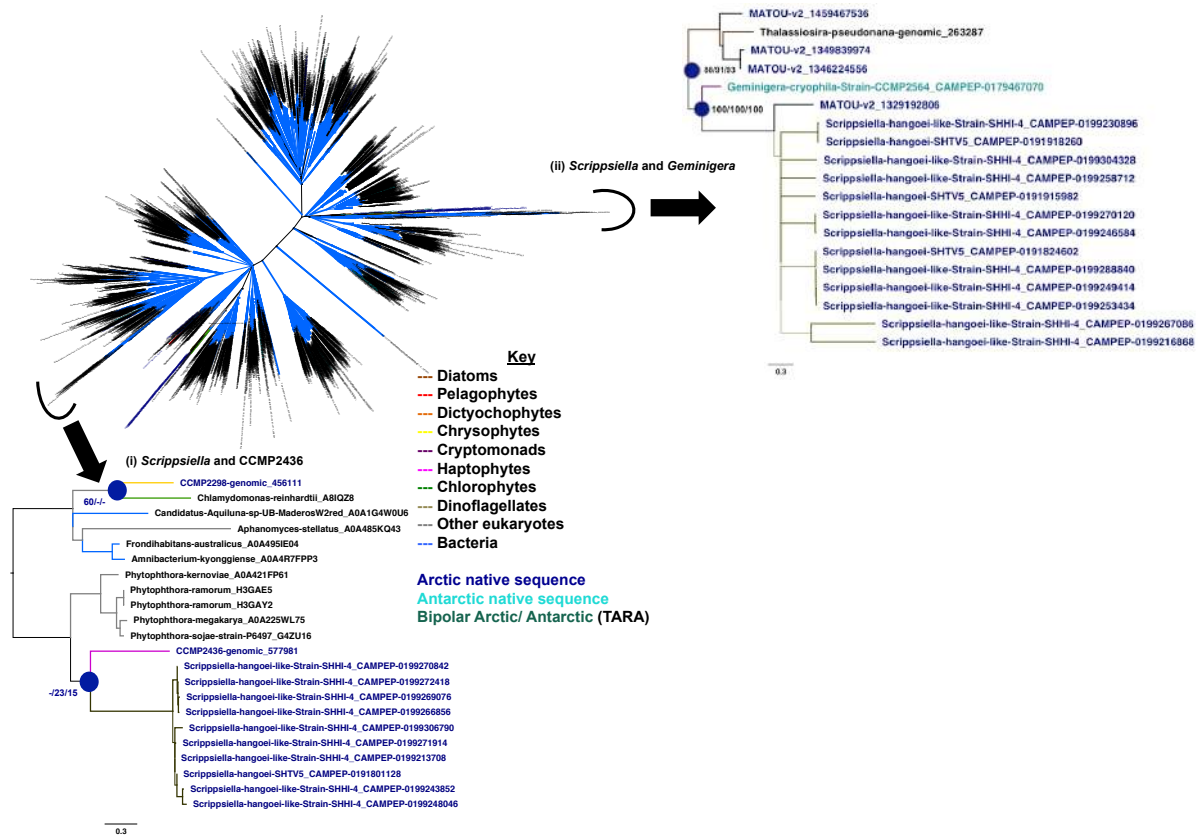

1039

1040 **Fig. 5- Figure Supplement 3. Diversity and polar horizontal gene transfers of DUF347 domains.** This  
 1041 figure summarises the consensus best-scoring tree topology obtained with RaxML under GTR, JTT  
 1042 and WAG substitution models for a 3942 branch x 240 aa alignment of all DUF347 domains (PF03988)  
 1043 sampled from UniRef, jgi algal genomes, MMETSP, *Tara* Oceans, and an independent transcriptome  
 1044 survey of Baffin Island Northwater communities. Branches are shaded by evolutionary origin and leaf  
 1045 nodes by biogeography (either: isolation location of cultured accessions where recorded; or on  
 1046 oceanic regions for which > 70% total abundance of each Tara meta-gene could be recorded). Thick  
 1047 branches indicate presence of a clade in all three best-scoring tree outputs. Top: overview of the  
 1048 global topology obtained; bottom: magnified topology of a two clades containing the Arctic  
 1049 freshwater dinoflagellate *Scrippsiella* and (i) Pavlova sp. CCMP2436, or (ii) the Antarctic  
 1050 cryptomonad *Geminigera*. Support values for two nodes linking *Scrippsiella*, *Geminigera* and multiple  
 1051 Arctic-only TARA meta-genes are shown with labelled circles.

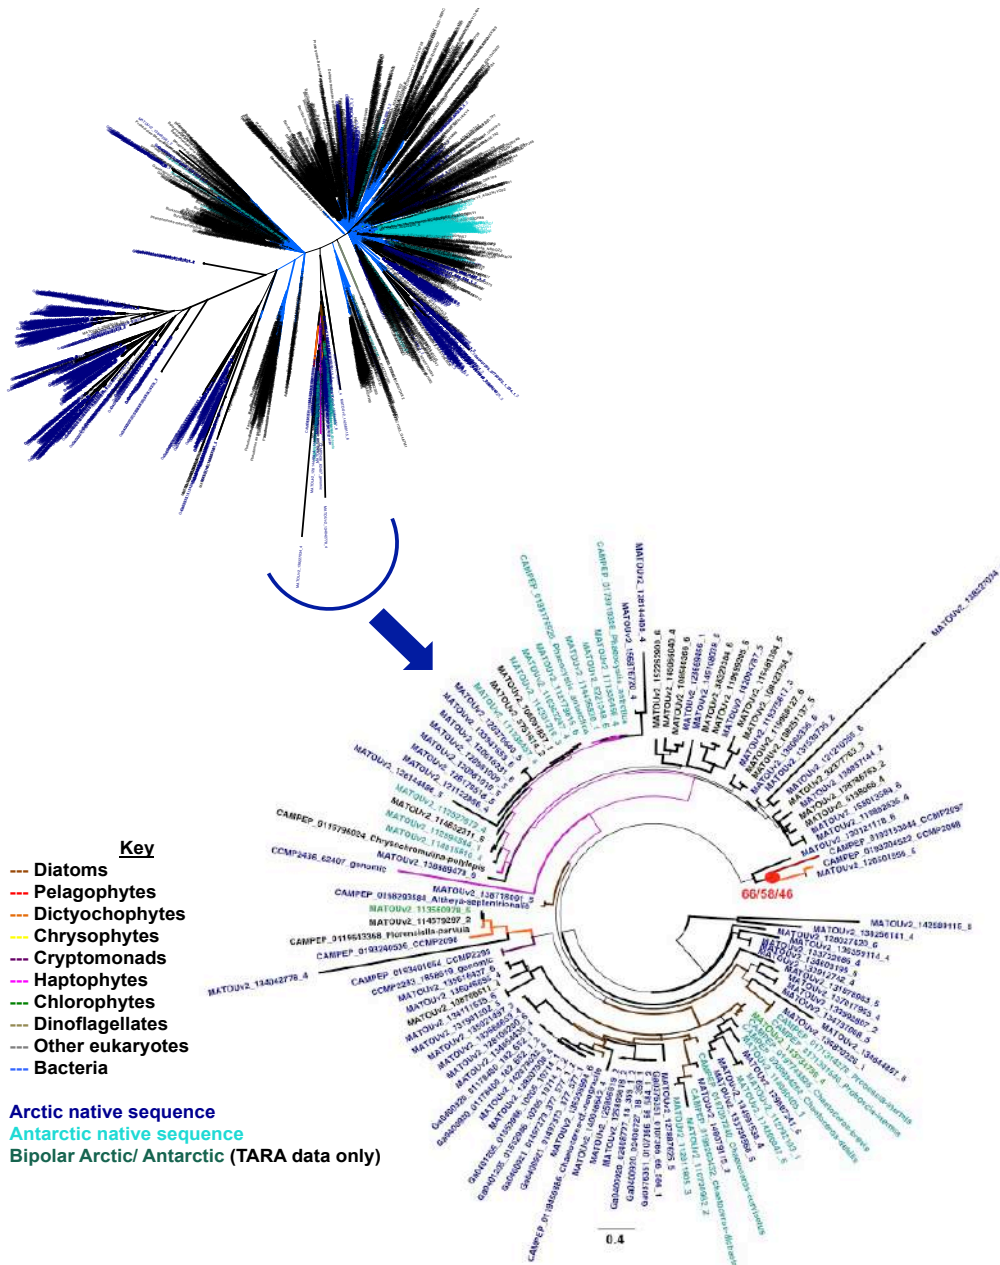

1052

1053 **Fig. 5- Figure Supplement 4. Diversity and polar horizontal gene transfers of PhnA domains.** This  
 1054 figure summarises the consensus best-scoring tree topology obtained with RaxML under GTR, JTT  
 1055 and WAG substitution models for a 2934 branch x 113 aa alignment of all PhnA domains (PF03831)  
 1056 sampled from UniRef, jgi algal genomes, MMETSP, *Tara* Oceans, and an independent transcriptome  
 1057 survey of Baffin Island Northwater communities. Branches are shaded by evolutionary origin and leaf  
 1058 nodes by biogeography (either: isolation location of cultured accessions where recorded; or on  
 1059 oceanic regions for which > 70% total abundance of each *Tara* meta-gene could be recorded). Thick  
 1060 branches indicate presence of a clade in all three best-scoring tree outputs. Top: overview of the  
 1061 global topology obtained; bottom: magnified topology of a single clade showing evidence of  
 1062 horizontal gene transfer between Arctic- and Antarctic eukaryotic algae. A well-supported clade of  
 1063 Arctic pelagophyte (CCMP2097) and dictyochophyte (CCMP2098) sequences is shown with a red  
 1064 circle.

1065

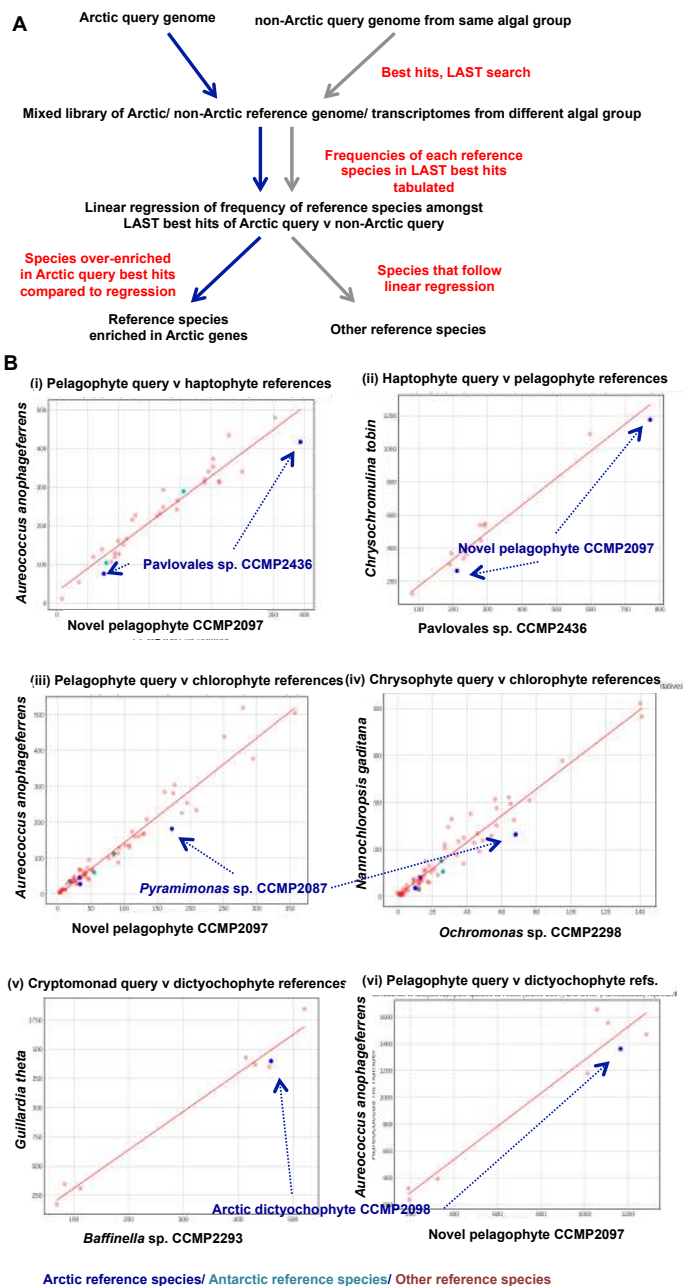

1066

1067 **Fig. 6- Figure Supplement 1. Identification of species enriched in Arctic-specific genes by LAST best**  
 1068 **hit search. A:** Outline of the methodology used. Two query genomes (one Arctic, one not) from a  
 1069 query algal genome are searched against a mixed library of sequences from another algal group by  
 1070 LAST. As the query genomes are the same phylogenetic distance from the reference group each  
 1071 reference species should be retrieved as a LAST best hit a proportionate number of times by each  
 1072 query, with references that deviate from a linear relationship enriched in Arctic-specific genes. **B:**  
 1073 exemplar scatterplots of the number of LAST best hits obtained with Arctic (horizontal) and non-  
 1074 Arctic (vertical) queries against different algal groups; showing (i, ii) a bidirectional enrichment in  
 1075 LAST best hits between Pavlova sp. CCMP2436 and the novel pelagophyte CCMP2097 in searches  
 1076 between haptophyte and pelagophyte libraries; (iii, iv) an enrichment in *Pyramimonas* sp. CCMP2087  
 1077 in LAST best hits with Arctic pelagophyte and chrysophyte queries; and (v, vi) an enrichment in the  
 1078 Arctic dictyochophyte CCMP2098 in LAST best hits with Arctic cryptomonad and pelagophyte queries.

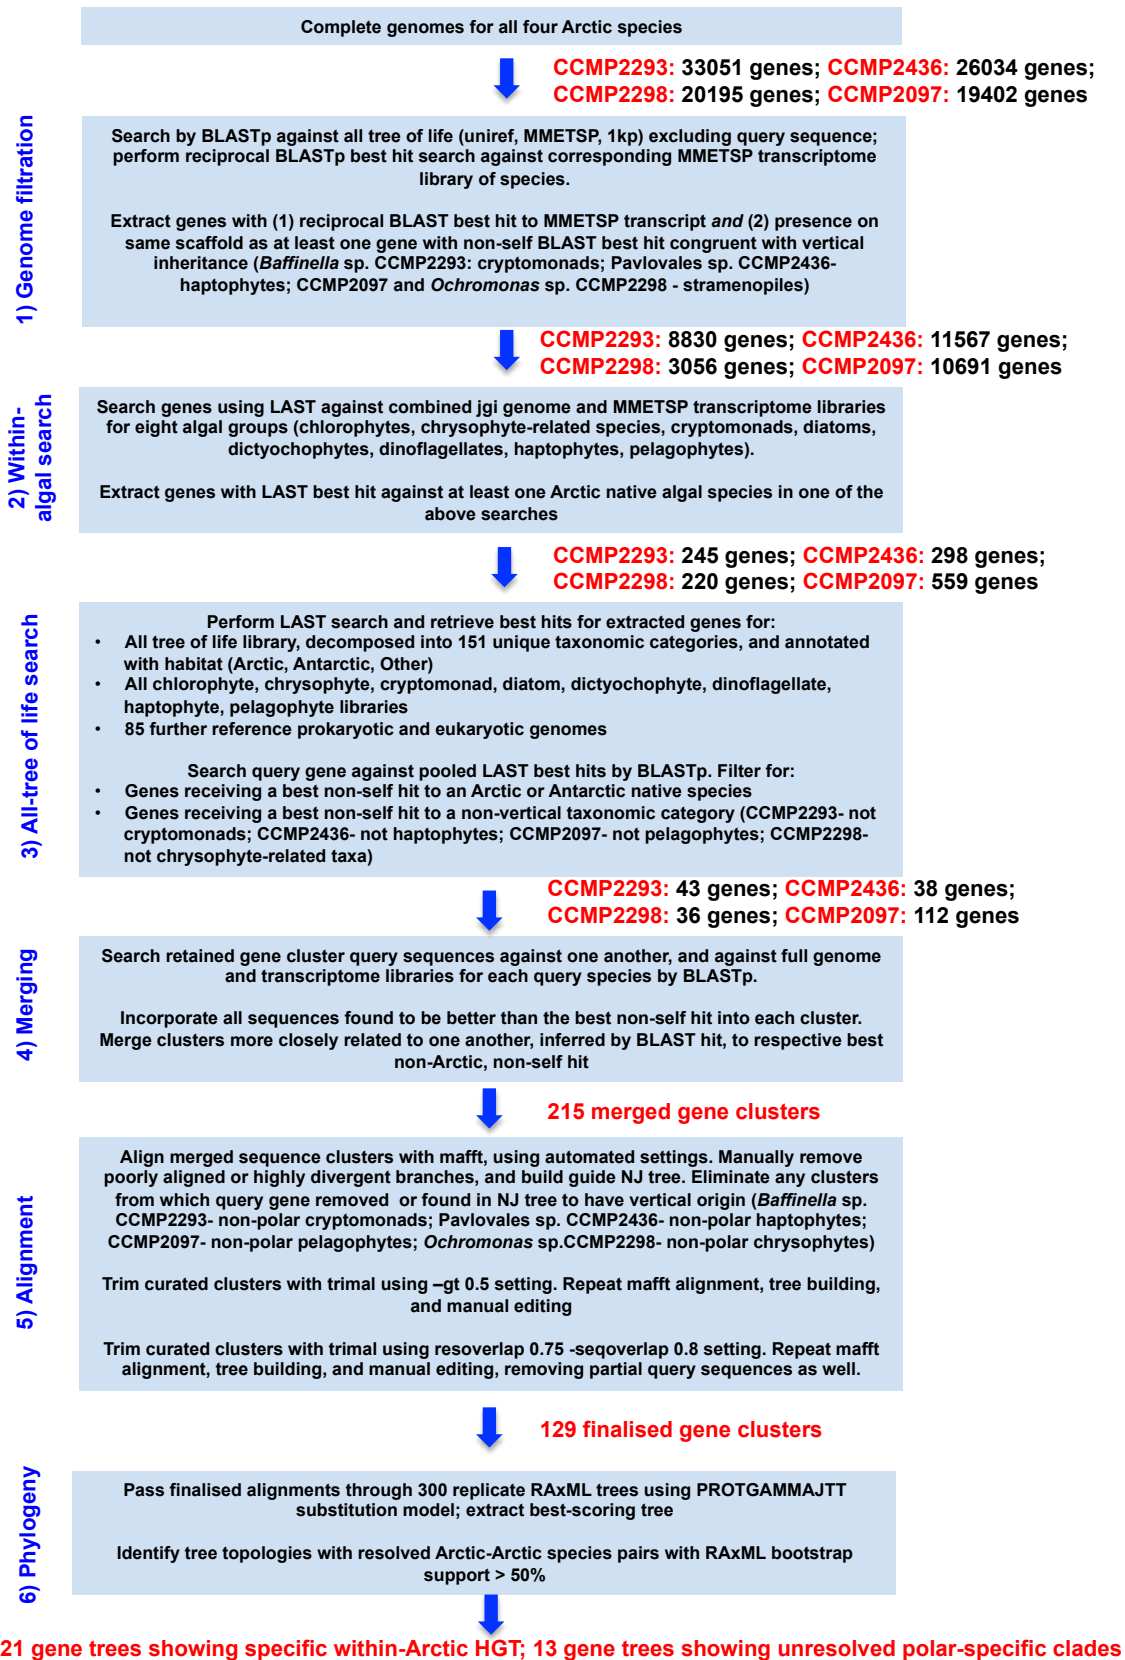

1079

1080

1081

Fig. 6- Figure Supplement 2. Pipeline of the phylogenomic approach used to identify within-Arctic HGTs in Arctic algal genomes.

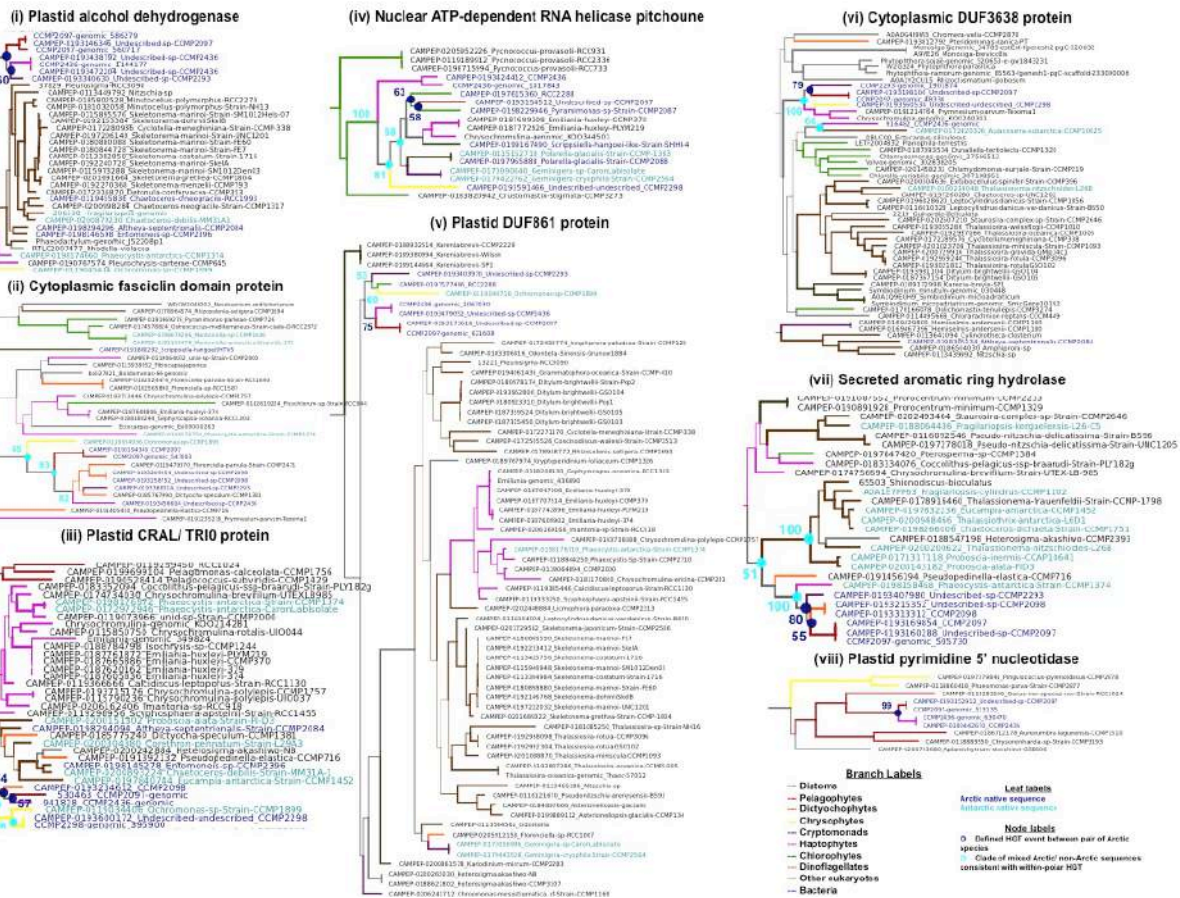

**Fig. 6- Figure Supplement 3. Eight exemplar within-Arctic HGT clusters identified by whole-genome phylogenetic profiling.** The tree topologies shown consist of the proposed within Arctic-HGT clade and its two closest sister-groups; full tree topologies for these and 26 additional identified within-Arctic HGT trees are shown in Table S4, Sheet 9; and full nexus format tree topologies prepared using the same graphical format as detailed below are available through <https://osf.io/3pmxb/files> (Dorrell et al., 2021b) in «Supporting data > Exemplar within-Arctic HGT trees ». Branches are shaded by phylogenetic origin, leaves by biogeographical origin, and nodes resolving within-Arctic HGT events with > 50% bootstrap support are identified with coloured circles.



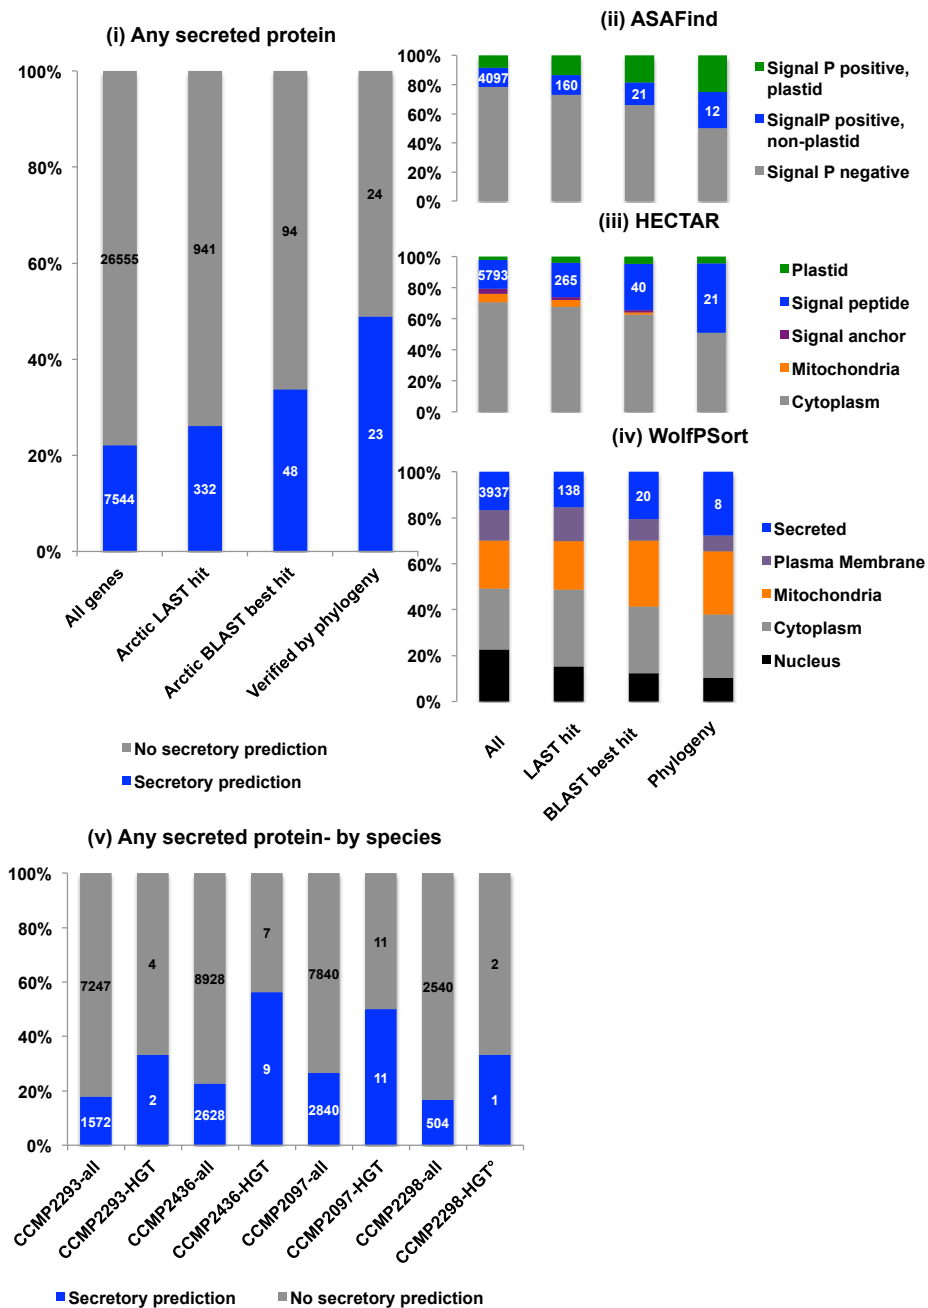

1092

1093 **Fig. 6- Figure Supplement 4. Secretory bias in within-Arctic HGTs.** Bar charts showing (i-iv) the  
 1094 targeting predictions of all proteins in all Arctic algal genomes inspected for within-Arctic HGT; the  
 1095 total number of proteins yielding Arctic LAST or BLAST best hits per **Fig. 6- figure supplement 2**; and  
 1096 the total non-redundant proteins attributed to within Arctic-HGT; and (v) the total number of  
 1097 inspected proteins, and phylogenetically verified within-Arctic HGTs for each species. Targeting  
 1098 predictions were performed using ASAFind with SignalP v 3.0 (Gruber, Rocop, Kroth, Armbrust, &  
 1099 Mock, 2015), HECTAR under default conditions (Gschloessl, Guermeur, & Cock, 2008), and WolfPSort,  
 1100 with consensus animal, plant and fungal reference datasets (Horton et al., 2007) with proteins  
 1101 inferred to have a signal peptide and non-plastid prediction by either ASAFind or HECTAR, or an  
 1102 extracellular prediction by WolfPSort, inferred to be potentially secreted proteins.

1103

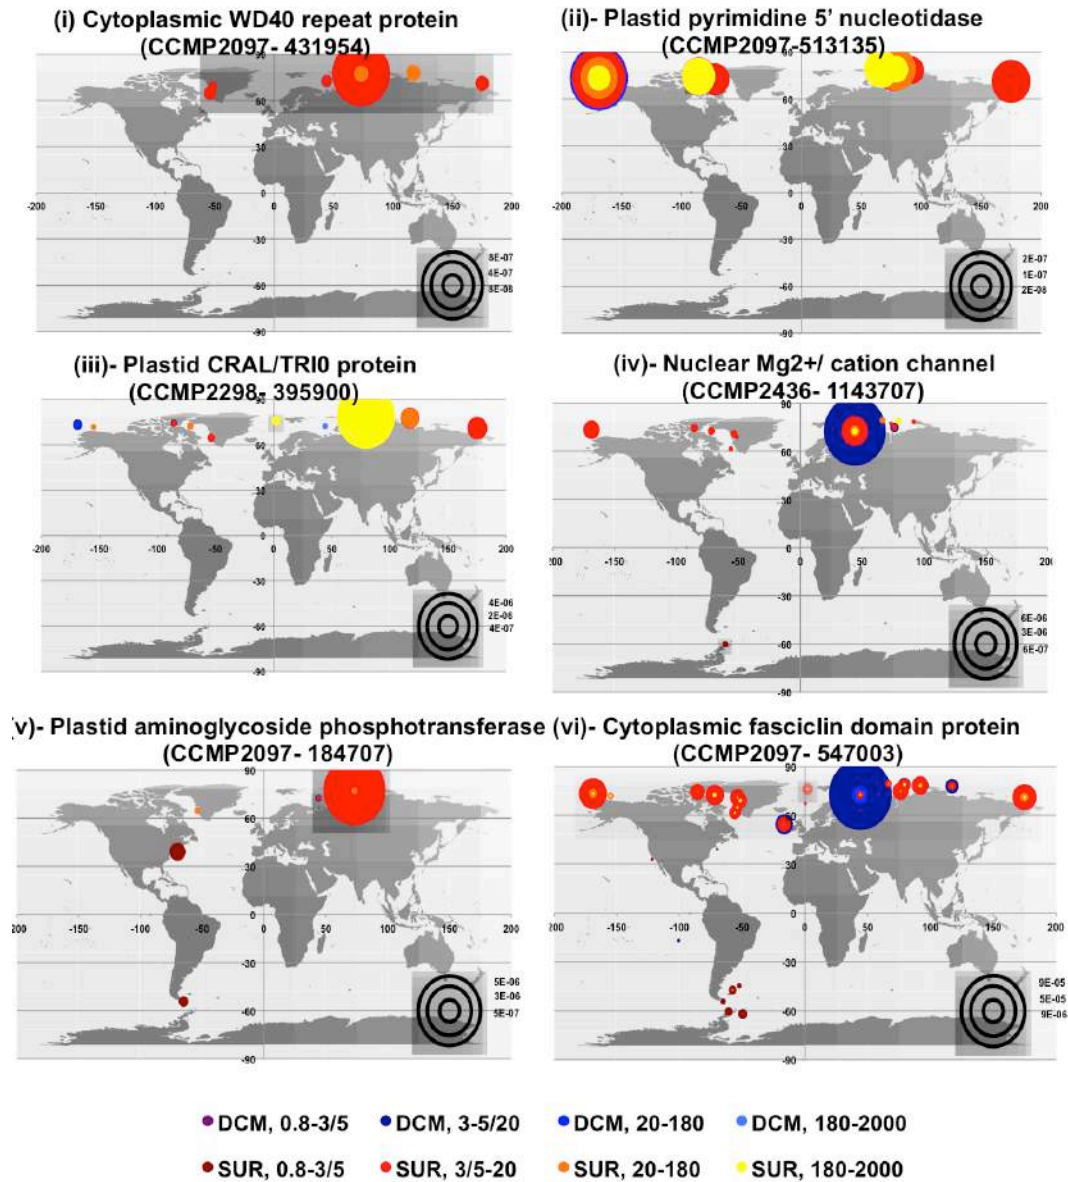

1104

1105 **Fig. 6- Figure Supplement 5. Environmental distributions of *Tara* Oceans meta-transcriptome**  
 1106 **homologues of six exemplar gene clusters phylogenetically inferred to have undergone within-**  
 1107 **Arctic HGT.** This figure provides distributions for the environmental equivalents of within- Arctic HGT  
 1108 clade identified in Table S4, Sheet 9, as resolved by a combined hmmer, BLAST best-hit, MAFFT  
 1109 alignment and NJ tree pipeline. Total relative abundances are provided for all size fractions, and at  
 1110 both surface and deep chlorophyll maximum depth samples. Complete tabulated homologue  
 1111 sequences and abundances for all tractable genes in both meta-genome and meta-transcriptome  
 1112 data are presented in Table S4, sheets 10-11; and individual plots of total relative abundances and  
 1113 individual relative abundances for each phylogenetically reconciled gene are available through  
 1114 <https://osf.io/3pmbx/files> (Dorrell et al., 2021b) in «Supporting data > Within-Arctic HGTs > TARA  
 1115 distributions ».

1116

1117

1118 **References**

- 1119 Anderson, E. L., Li, W., Klitgord, N., Highlander, S. K., Dayrit, M., Seguritan, V., . . . Jones, M. B.  
1120 (2016). A robust ambient temperature collection and stabilization strategy: Enabling  
1121 worldwide functional studies of the human microbiome. *Sci Rep*, 6, 31731.  
1122 doi:10.1038/srep31731
- 1123 Armbrust, E. V., Berges, J. A., Bowler, C., Green, B. R., Martinez, D., Putnam, N. H., . . . Rokhsar, D. S.  
1124 (2004). The genome of the diatom *Thalassiosira pseudonana*: ecology, evolution, and  
1125 metabolism. *Science*, 306(5693), 79-86.
- 1126 Beisser, D., Graupner, N., Bock, C., Wodniok, S., Grossmann, L., Vos, M., . . . Boenigk, J. (2017).  
1127 Comprehensive transcriptome analysis provides new insights into nutritional strategies  
1128 and phylogenetic relationships of chrysophytes. *PeerJ*, 5, e2832. doi:10.7717/peerj.2832
- 1129 Bendif, e. M., Probert, I., Hervé, A., Billard, C., Goux, D., Lelong, C., . . . Véron, B. (2011). Integrative  
1130 taxonomy of the Pavlovophyceae (Haptophyta): a reassessment. *Protist*, 162(5), 738-761.  
1131 doi:10.1016/j.protis.2011.05.001
- 1132 Beszczynska-Moller, A., Woodgate, R. A., Lee, C., Melling, H., & Karcher, M. (2011). A synthesis of  
1133 exchanges through the main oceanic gateways to the Arctic Ocean. *Oceanography*, 24(3),  
1134 82-99. doi:10.5670/oceanog.2011.59
- 1135 Bock, N. A., Charvet, S., Burns, J., Gyaltsen, Y., Rozenberg, A., Duhamel, S., & Kim, E. (2021).  
1136 Experimental identification and in silico prediction of bacterivory in green algae. *ISME J*.  
1137 doi:10.1038/s41396-021-00899-w
- 1138 Brinkmeyer, R., Knittel, K., Jürgens, J., Weyland, H., Amann, R., & Helmke, E. (2003). Diversity and  
1139 structure of bacterial communities in Arctic versus Antarctic pack ice. *Appl Environ*  
1140 *Microbiol*, 69(11), 6610-6619.
- 1141 Buchfink, B., Xie, C., & Huson, D. H. (2015). Fast and sensitive protein alignment using DIAMOND.  
1142 *Nat Methods*, 12(1), 59-60. doi:10.1038/nmeth.3176
- 1143 Burki, F., Kaplan, M., Tikhonenkov, D. V., Zlatogursky, V., Minh, B. Q., Radaykina, L. V., . . . Keeling,  
1144 P. J. (2016). Untangling the early diversification of eukaryotes: a phylogenomic study of  
1145 the evolutionary origins of Centrohelida, Haptophyta and Cryptista. *Proc Biol Sci*,  
1146 283(1823). doi:10.1098/rspb.2015.2802
- 1147 Cao, S., Zhang, W., Ding, W., Wang, M., Fan, S., Yang, B., . . . Zhang, Y.-Z. (2020). Structure and  
1148 function of the Arctic and Antarctic marine microbiota as revealed by metagenomics.  
1149 *Microbiome*, 8(1), 47. doi:10.1186/s40168-020-00826-9
- 1150 Capella-Gutiérrez, S., Silla-Martínez, J. M., & Gabaldón, T. (2009). trimAl: a tool for automated  
1151 alignment trimming in large-scale phylogenetic analyses. *Bioinformatics*, 25(15), 1972-  
1152 1973. doi:10.1093/bioinformatics/btp348
- 1153 Carmack, E. C. (2007). The alpha/beta ocean distinction: a perspective on freshwater fluxes,  
1154 convection, nutrients and productivity in high-latitude seas. *Deep-Sea Res. Part II*, 54(23-  
1155 26), 21.
- 1156 Carpenter, E. J., Matasci, N., Ayyampalayam, S., Wu, S., Sun, J., Yu, J., . . . Wong, G. K. (2019). Access  
1157 to RNA-sequencing data from 1,173 plant species: the 1000 Plant transcriptomes  
1158 initiative (1KP). *Gigascience*, 8(10). doi:10.1093/gigascience/giz126
- 1159 Carradec, Q., Pelletier, E., Da Silva, C., Alberti, A., Seeleuthner, Y., Blanc-Mathieu, R., . . .  
1160 Coordinators, T. O. (2018). A global ocean atlas of eukaryotic genes. *Nat Commun*, 9(1),  
1161 373. doi:10.1038/s41467-017-02342-1
- 1162 Cenci, U., Sibbald, S. J., Curtis, B. A., Kamikawa, R., Eme, L., Moog, D., . . . Archibald, J. M. (2018).  
1163 Nuclear genome sequence of the plastid-lacking cryptomonad *Goniomonas avonlea*  
1164 provides insights into the evolution of secondary plastids. *BMC Biol*, 16(1), 137.  
1165 doi:10.1186/s12915-018-0593-5
- 1166 Chetouani, F., Glaser, P., & Kunst, F. (2001). FindTarget: software for subtractive genome  
1167 analysis. *Microbiology (Reading)*, 147(Pt 10), 2643-2649. doi:10.1099/00221287-147-  
1168 10-2643
- 1169 Choi, I. G., & Kim, S. H. (2007). Global extent of horizontal gene transfer. *Proc Natl Acad Sci USA*,  
1170 104(11), 4489-4494. doi:10.1073/pnas.0611557104

1171 Cid, F. P., Maruyama, F., Murase, K., Graether, S. P., Larama, G., Bravo, L. A., & Jorquera, M. A.  
1172 (2018). Draft genome sequences of bacteria isolated from the *Deschampsia antarctica*  
1173 phyllosphere. *Extremophiles*, 22(3), 537-552. doi:10.1007/s00792-018-1015-x  
1174 Craveiro, S. C., Daugbjerg, N., Moestrup, Ø., & Calado, A. J. (2017). Studies on *Peridinium*  
1175 *aciculiferum* and *Peridinium malmogiense* (= *Scrippsiella hangoei*): comparison with  
1176 *Chimonodinium lomnickii* and description of *Apocalathium* gen. nov. (Dinophyceae).  
1177 *Phycologia*, 56(1), 21-35. doi:10.2216/16-20.1  
1178 Cummins, C. A., & McInerney, J. O. (2011). A method for inferring the rate of evolution of  
1179 homologous characters that can potentially improve phylogenetic inference, resolve  
1180 deep divergence and correct systematic biases. *Syst Biol*, 60(6), 833-844.  
1181 doi:10.1093/sysbio/syr064  
1182 Curtis, B. A., Tanifuji, G., Burki, F., Gruber, A., Irimia, M., Maruyama, S., . . . Archibald, J. M. (2012).  
1183 Algal genomes reveal evolutionary mosaicism and the fate of nucleomorphs. *Nature*,  
1184 492(7427), 59-65. doi:10.1038/nature11681  
1185 Daugbjerg, N., Norlin, A., & Lovejoy, C. (2018). *Baffinella frigidus* gen. et sp. nov. (Baffinellaceae  
1186 fam. nov., Cryptophyceae) from Baffin Bay: morphology, pigment profile, phylogeny, and  
1187 growth rate response to three abiotic factors. *J Phycol*, 54(5), 665-680.  
1188 doi:10.1111/jpy.12766  
1189 Davis, A. K., Hildebrand, M., & Palenik, B. (2006). Gene expression induced by copper stress in  
1190 the diatom *Thalassiosira pseudonana*. *Eukaryot Cell*, 5(7), 1157-1168.  
1191 doi:10.1128/EC.00042-06  
1192 De Bie, T., Cristianini, N., Demuth, J. P., & Hahn, M. W. (2006). CAFE: a computational tool for the  
1193 study of gene family evolution. *Bioinformatics*, 22(10), 1269-1271.  
1194 doi:10.1093/bioinformatics/btl097  
1195 de Vargas, C., Audic, S., Henry, N., Decelle, J., Mahé, F., Logares, R., . . . Coordinators, T. O. (2015).  
1196 Ocean plankton. Eukaryotic plankton diversity in the sunlit ocean. *Science*, 348(6237),  
1197 1261605. doi:10.1126/science.1261605  
1198 Derelle, E., Ferraz, C., Rombauts, S., Rouzé, P., Worden, A. Z., Robbens, S., . . . Moreau, H. (2006).  
1199 Genome analysis of the smallest free-living eukaryote *Ostreococcus tauri* unveils many  
1200 unique features. *Proc Natl Acad Sci U S A*, 103(31), 11647-11652.  
1201 doi:10.1073/pnas.0604795103  
1202 Dorrell, R. G., Azuma, T., Nomura, M., Audren de Kerdrel, G., Paoli, L., Yang, S., . . . Kamikawa, R.  
1203 (2019). Principles of plastid reductive evolution illuminated by nonphotosynthetic  
1204 chrysophytes. *Proc Natl Acad Sci USA*, 116(14), 6914-6923.  
1205 doi:10.1073/pnas.1819976116  
1206 Dorrell, R. G., Klinger, C. M., Newby, R. J., Butterfield, E. R., Richardson, E., Dacks, J. B., . . . Bowler,  
1207 C. (2017). Progressive and biased divergent evolution underpins the origin and  
1208 diversification of peridinin dinoflagellate plastids. *Mol Biol Evol*, 34(2), 361-379.  
1209 doi:10.1093/molbev/msw235  
1210 Dorrell, R. G., Villain, A., Perez-Lamarque, B., Audren de Kerdrel, G., McCallum, G., Watson, A. K., . . .  
1211 . Blanc, G. (2021a). Phylogenomic fingerprinting of tempo and functions of horizontal  
1212 gene transfer within ochrophytes. *Proc Natl Acad Sci USA*, 118(4).  
1213 doi:10.1073/pnas.2009974118  
1214 Dorrell, R. G., Lovejoy, C., Zarevski, N., Bowler, C., Kuo, A., Grigoriev, I., . . . Dacks, J. (2021b). Arctic  
1215 algal genomes supporting data. <https://osf.io/3pmxb/>.  
1216 Eegeesiak, O., Aariak, E., & Kleist, K. (2017). People of the ice bridge: the future of the  
1217 Pikialasorsuaq. *Report of the Pikialasorsuaq Commission, Inuit Circumpolar Council*  
1218 *Canada, Ottawa*.  
1219 Eme, L., Gentekaki, E., Curtis, B., Archibald, J. M., & Roger, A. J. (2017). Lateral gene transfer in the  
1220 adaptation of the anaerobic parasite *Blastocystis* to the gut. *Curr Biol*, 27(6), 807-820.  
1221 doi:10.1016/j.cub.2017.02.003  
1222 Emms, D. M., & Kelly, S. (2019). OrthoFinder: phylogenetic orthology inference for comparative  
1223 genomics. *Genome Biol*, 20(1), 238. doi:10.1186/s13059-019-1832-y

1224 Furnholm, T. R., & Tisa, L. S. (2014). The ins and outs of metal homeostasis by the root nodule  
1225 actinobacterium *Frankia*. *BMC Genomics*, *15*, 1092. doi:10.1186/1471-2164-15-1092

1226 Gachon, C. M. M., Heesch, S., Kuepper, F. C., Achilles-Day, U. E. M., Brennan, D., Campbell, C. N., . . .  
1227 Day, J. G. (2013). The CCAP KnowledgeBase: linking protistan and cyanobacterial  
1228 biological resources with taxonomic and molecular data. *Systematics and Biodiversity*,  
1229 *11*(4), 407-413. doi:10.1080/14772000.2013.859641

1230 Gast, R. J., Moran, D. M., Dennett, M. R., & Caron, D. A. (2007). Kleptoplasty in an Antarctic  
1231 dinoflagellate: caught in evolutionary transition? *Environ Microbiol*, *9*(1), 39-45.  
1232 doi:10.1111/j.1462-2920.2006.01109.x

1233 Gnerre, S., Maccallum, I., Przybylski, D., Ribeiro, F. J., Burton, J. N., Walker, B. J., . . . Jaffe, D. B.  
1234 (2011). High-quality draft assemblies of mammalian genomes from massively parallel  
1235 sequence data. *Proc Natl Acad Sci U S A*, *108*(4), 1513-1518.  
1236 doi:10.1073/pnas.1017351108

1237 Gobler, C. J., Berry, D. L., Dyhrman, S. T., Wilhelm, S. W., Salamov, A., Lobanov, A. V., . . . Grigoriev,  
1238 I. V. (2011). Niche of harmful alga *Aureococcus anophagefferens* revealed through  
1239 ecogenomics. *Proc Natl Acad Sci USA* *108*(11), 4352-4357.  
1240 doi:10.1073/pnas.1016106108

1241 Grigoriev, I. V., Hayes, R. D., Calhoun, S., Kamel, B., Wang, A., Ahrendt, S., . . . Kuo, A. (2021).  
1242 PhycoCosm, a comparative algal genomics resource. *Nucleic Acids Res*, *49*(D1), D1004-  
1243 D1011. doi:10.1093/nar/gkaa898

1244 Grossmann, L., Bock, C., Schweikert, M., & Boenigk, J. (2016). Small but manifold - hidden  
1245 diversity in "*Spumella*-like flagellates". *J Eukaryot Microbiol*, *63*(4), 419-439.  
1246 doi:10.1111/jeu.12287

1247 Gruber, A., Rocap, G., Kroth, P. G., Armbrust, E. V., & Mock, T. (2015). Plastid proteome prediction  
1248 for diatoms and other algae with secondary plastids of the red lineage. *Plant J*, *81*(3),  
1249 519-528. doi:10.1111/tbj.12734

1250 Gschloessl, B., Guermeur, Y., & Cock, J. M. (2008). HECTAR: a method to predict subcellular  
1251 targeting in heterokonts. *BMC Bioinformatics*, *9*, 393. doi:10.1186/1471-2105-9-393

1252 Guiry, M. D., Guiry, G. M., Morrison, L., Rindi, F., Valenzuala Miranda, S., Mathieson, A. C., . . .  
1253 Garbary, D. J. (2014). AlgaeBase: an on-line resource for algae. *Cryptogamie, Algologie*,  
1254 *35*(2), 11.

1255 Hamilton, A. K., Lovejoy, C., Galand, P. E., & Ingram, R. G. (2008). Water masses and biogeography  
1256 of picoeukaryote assemblages in a cold hydrographically complex system. *Limnology and*  
1257 *Oceanography*, *53*(3), 922-935. doi:10.4319/lo.2008.53.3.0922

1258 Han, K. Y., Graf, L., Reyes, C. P., Melkonian, B., Andersen, R. A., Yoon, H. S., & Melkonian, M. (2018).  
1259 A re-investigation of *Sarcinochrysis marina* (Sarcinochrysidales, Pelagophyceae) from its  
1260 type locality and the descriptions of *Arachnochrysis*, *Pelagospilus*, *Sargassococcus* and  
1261 *Sungminbooa* genera nov. *Protist*, *169*(1), 79-106. doi:10.1016/j.protis.2017.12.004

1262 Horn, H., Slaby, B. M., Jahn, M. T., Bayer, K., Moitinho-Silva, L., Förster, F., . . . Hentschel, U. (2016).  
1263 An enrichment of CRISPR and other defense-related features in marine sponge-  
1264 associated microbial metagenomes. *Front Microbiol*, *7*, 1751.  
1265 doi:10.3389/fmicb.2016.01751

1266 Horton, P., Park, K. J., Obayashi, T., Fujita, N., Harada, H., Adams-Collier, C. J., & Nakai, K. (2007).  
1267 WoLF PSORT: protein localization predictor. *Nucleic Acids Research*, *35*, W585-W587.  
1268 doi:10.1093/nar/gkm259

1269 Hovde, B. T., Deodato, C. R., Hunsperger, H. M., Ryken, S. A., Yost, W., Jha, R. K., . . . Cattolico, R. A.  
1270 (2015). Genome sequence and transcriptome Analyses of *Chrysochromulina tobin*:  
1271 metabolic tools for enhanced algal fitness in the prominent order Prymnesiales  
1272 (Haptophyceae). *PLoS Genetics*, *11*(9). doi:10.1371/journal.pgen.1005469

1273 Ibarbalz, F. M., Henry, N., Brandão, M. C., Martini, S., Busseni, G., Byrne, H., . . . Coordinators, T. O.  
1274 (2019). Global trends in marine plankton diversity across kingdoms of life. *Cell*, *179*(5),  
1275 1084-1097.e1021. doi:10.1016/j.cell.2019.10.008

1276 Initiative, O. T. P. T. (2019). One thousand plant transcriptomes and the phylogenomics of green  
1277 plants. *Nature*, *574*(7780), 679-685. doi:10.1038/s41586-019-1693-2

1278 Irwin, N., Pittis, A., Richards, T., & Keeling, P. (2021). Viral-eukaryotic gene exchange drives  
1279 infection mode and cellular evolution. *ResearchSquare, preprint*, 380297.  
1280 doi:10.21203/rs.3.rs-380297/v1

1281 Jeong, H., Kang, H., Lim, A., Jang, S., Lee, K., Lee, S., . . . Kim, K. (2021). Feeding diverse prey as an  
1282 excellent strategy of mixotrophic dinoflagellates for global dominance. *Sci Adv*, 7(2),  
1283 eabe4214.

1284 Joli, N., Monier, A., Logares, R., & Lovejoy, C. (2017). Seasonal patterns in Arctic prasinophytes  
1285 and inferred ecology of *Bathycoccus* unveiled in an Arctic winter metagenome. *ISME J*,  
1286 11(6), 1372-1385. doi:10.1038/ismej.2017.7

1287 Jones, P., Binns, D., Chang, H. Y., Fraser, M., Li, W., McAnulla, C., . . . Hunter, S. (2014).  
1288 InterProScan 5: genome-scale protein function classification. *Bioinformatics*, 30(9),  
1289 1236-1240. doi:10.1093/bioinformatics/btu031

1290 Kanehisa, M., & Sato, Y. (2020). KEGG Mapper for inferring cellular functions from protein  
1291 sequences. *Protein Sci*, 29(1), 28-35. doi:10.1002/pro.3711

1292 Katoh, K., Rozewicki, J., & Yamada, K. D. (2017). MAFFT online service: multiple sequence  
1293 alignment, interactive sequence choice and visualization. *Brief Bioinform*.  
1294 doi:10.1093/bib/bbx108

1295 Keeling, P. J., Burki, F., Wilcox, H. M., Allam, B., Allen, E. E., Amaral-Zettler, L. A., . . . Worden, A. Z.  
1296 (2014). The Marine Microbial Eukaryote Transcriptome Sequencing Project (MMETSP):  
1297 illuminating the functional diversity of eukaryotic life in the oceans through  
1298 transcriptome sequencing. *PLoS Biol*, 12(6), e1001889.  
1299 doi:10.1371/journal.pbio.1001889

1300 Kieřbasa, S. M., Wan, R., Sato, K., Horton, P., & Frith, M. C. (2011). Adaptive seeds tame genomic  
1301 sequence comparison. *Genome Res*, 21(3), 487-493. doi:10.1101/gr.113985.110

1302 Kulakova, A. N., Kulakov, L. A., Akulenko, N. V., Ksenzenko, V. N., Hamilton, J. T., & Quinn, J. P.  
1303 (2001). Structural and functional analysis of the phosphonoacetate hydrolase (phnA)  
1304 gene region in *Pseudomonas fluorescens* 23F. *J Bacteriol*, 183(11), 3268-3275.  
1305 doi:10.1128/JB.183.11.3268-3275.2001

1306 Kumar, S., Stecher, G., Li, M., Knyaz, C., & Tamura, K. (2018). MEGA X: Molecular Evolutionary  
1307 Genetics Analysis across computing platforms. *Mol Biol Evol*, 35(6), 1547-1549.  
1308 doi:10.1093/molbev/msy096

1309 Kuo, A., Bushnell, B., & Grigoriev, I. V. (2014). Chapter One - Fungal Genomics: sequencing and  
1310 annotation. In F. M. Martin (Ed.), *Advances in Botanical Research* (Vol. 70, pp. 1-52):  
1311 Academic Press.

1312 Leu, E., Mundy, C. J., Assmy, P., Campbell, K., Gabrielsen, T. M., Gosselin, M., . . . Gradinger, R.  
1313 (2015). Arctic spring awakening - steering principles behind the phenology of vernal ice  
1314 algal blooms. *Progress in Oceanography*, 139, 151-170.  
1315 doi:10.1016/j.pocean.2015.07.012

1316 Li, W. K., McLaughlin, F. A., Lovejoy, C., & Carmack, E. C. (2009). Smallest algae thrive as the  
1317 Arctic Ocean freshens. *Science*, 326(5952), 539. doi:10.1126/science.1179798

1318 Liang, Y., Koester, J. A., Liefer, J. D., Irwin, A. J., & Finkel, Z. V. (2019). Molecular mechanisms of  
1319 temperature acclimation and adaptation in marine diatoms. *ISME J*, 13(10), 2415-2425.  
1320 doi:10.1038/s41396-019-0441-9

1321 Lie, A. A. Y., Liu, Z., Terrado, R., Tatters, A. O., Heidelberg, K. B., & Caron, D. A. (2018). A tale of two  
1322 mixotrophic chrysophytes: Insights into the metabolisms of two *Ochromonas* species  
1323 (Chrysophyceae) through a comparison of gene expression. *PLoS One*, 13(2), e0192439.  
1324 doi:10.1371/journal.pone.0192439

1325 Lin, S., Cheng, S., Song, B., Zhong, X., Lin, X., Li, W., . . . Morse, D. (2015). The *Symbiodinium*  
1326 *kawagutii* genome illuminates dinoflagellate gene expression and coral symbiosis.  
1327 *Science*, 350(6261), 691-694. doi:10.1126/science.aad0408

1328 Lommer, M., Specht, M., Roy, A. S., Kraemer, L., Andreson, R., Gutowska, M. A., . . . LaRoche, J.  
1329 (2012). Genome and low-iron response of an oceanic diatom adapted to chronic iron  
1330 limitation. *Genome Biology*, 13(7). doi:10.1186/gb-2012-13-7-r66

1331 Longhurst, A. (2006). *Ecological Geography of the Sea* (2nd ed.): Academic Press.

1332 Lovejoy, C., Vincent, W. F., Bonilla, S., Roy, S., Martineau, M. J., Terrado, R., . . . Pedros-Alio, C.  
1333 (2007). Distribution, phylogeny, and growth of cold-adapted picoprasinophytes in arctic  
1334 seas. *Journal of Phycology*, 43(1), 78-89. doi:10.1111/j.1529-8817.2006.00310.x  
1335 Marron, A. O., Ratcliffe, S., Wheeler, G. L., Goldstein, R. E., King, N., Not, F., . . . Richter, D. J. (2016).  
1336 The evolution of silicon transport in eukaryotes. *Molecular Biology and Evolution*, 33(12),  
1337 3226-3248. doi:10.1093/molbev/msw209  
1338 Martin, J. A., & Wang, Z. (2011). Next-generation transcriptome assembly. *Nature Reviews*  
1339 *Genetics*, 12(10), 671-682. doi:10.1038/nrg3068  
1340 McKie-Krisberg, Z. M., & Sanders, R. W. (2014). Phagotrophy by the picoeukaryotic green alga  
1341 *Micromonas*: implications for Arctic Oceans. *ISME J*, 8(10), 1953-1961.  
1342 doi:10.1038/ismej.2014.16  
1343 Metpally, R. P., & Reddy, B. V. (2009). Comparative proteome analysis of psychrophilic versus  
1344 mesophilic bacterial species: insights into the molecular basis of cold adaptation of  
1345 proteins. *BMC Genomics*, 10, 11. doi:10.1186/1471-2164-10-11  
1346 Miller, M. A., Schwartz, T., Pickett, B. E., He, S., Klem, E. B., Scheuermann, R. H., . . . O'Leary, M. A.  
1347 (2015). A RESTful API for access to phylogenetic tools via the CIPRES Science Gateway.  
1348 *Evol Bioinform Online*, 11, 43-48. doi:10.4137/EBO.S21501  
1349 Mistry, J., Chuguransky, S., Williams, L., Qureshi, M., Salazar, G. A., Sonnhammer, E. L. L., . . .  
1350 Bateman, A. (2020). PFAM: the protein families database in 2021. *Nucleic Acids Res*.  
1351 doi:10.1093/nar/gkaa913  
1352 Mock, T., Otilar, R. P., Strauss, J., McMullan, M., Paajanen, P., Schmutz, J., . . . Grigoriev, I. V. (2017).  
1353 Evolutionary genomics of the cold-adapted diatom *Fragilariopsis cylindrus*. *Nature*,  
1354 541(7638), 536-540. doi:10.1038/nature20803  
1355 Muñoz-Villagrán, C. M., Mendez, K. N., Cornejo, F., Figueroa, M., Undabarrena, A., Morales, E. H., . . .  
1356 Vásquez, C. C. (2018). Comparative genomic analysis of a new tellurite-resistant  
1357 *Psychrobacter* strain isolated from the Antarctic Peninsula. *PeerJ*, 6, e4402.  
1358 doi:10.7717/peerj.4402  
1359 Nelson, D. R., Hazzouri, K. M., Lauersen, K. J., Jaiswal, A., Chaiboonchoe, A., Mystikoi, A., . . . Salehi-  
1360 Ashtiani, K. (2021). Large-scale genome sequencing reveals the driving forces of viruses  
1361 in microalgal evolution. *Cell Host and Microbe*, 29, 250-266 .  
1362 doi:10.1016/j.chom.2020.12.005  
1363 Nguyen, L. T., Schmidt, H. A., von Haeseler, A., & Minh, B. Q. (2015). IQ-TREE: a fast and effective  
1364 stochastic algorithm for estimating maximum-likelihood phylogenies. *Mol Biol Evol*,  
1365 32(1), 268-274. doi:10.1093/molbev/msu300  
1366 Notz, D., & Stroeve, J. (2016). Observed Arctic sea-ice loss directly follows anthropogenic CO2  
1367 emission. *Science*, 354(6313), 747-750. doi:10.1126/science.aag2345  
1368 Pesant, S., Not, F., Picheral, M., Kandels-Lewis, S., Le Bescot, N., Gorsky, G., . . . Tara Oceans, C.  
1369 (2015). Open science resources for the discovery and analysis of Tara Oceans data.  
1370 *Scientific Data*, 2. doi:10.1038/sdata.2015.23  
1371 Potter, S. C., Luciani, A., Eddy, S. R., Park, Y., Lopez, R., & Finn, R. D. (2018). HMMER web server:  
1372 2018 update. *Nucleic Acids Res*, 46(W1), 200-204. doi:10.1093/nar/gky448  
1373 Radakovits, R., Jinkerson, R. E., Fuerstenberg, S. I., Tae, H., Settlage, R. E., Boore, J. L., & Posewitz,  
1374 M. C. (2013). Draft genome sequence and genetic transformation of the oleaginous alga  
1375 *Nannochloropsis gaditana*. *Nature Communications*, 4, 686. doi:10.1038/ncomms3356  
1376 Rastogi, A., Maheswari, U., Dorrell, R. G., Vieira, F. R. J., Maumus, F., Kustka, A., . . . Tirichine, L.  
1377 (2018). Integrative analysis of large scale transcriptome data draws a comprehensive  
1378 landscape of *Phaeodactylum tricornutum* genome and evolutionary origin of diatoms. *Sci*  
1379 *Rep*, 8(1), 4834. doi:10.1038/s41598-018-23106-x  
1380 Raymond, J. A. (2011). Algal ice-binding proteins change the structure of sea ice. *Proc Natl Acad*  
1381 *Sci USA*, 108(24), E198. doi:10.1073/pnas.1106288108  
1382 Raymond, J. A., & Kim, H. J. (2012). Possible role of horizontal gene transfer in the colonization of  
1383 sea ice by algae. *PLoS One*, 7(5), e35968. doi:10.1371/journal.pone.0035968

1384 Read, B. A., Kegel, J., Klute, M. J., Kuo, A., Lefebvre, S. C., Maumus, F., . . . Consortium, E. h. A.  
1385 (2013). Pan genome of the phytoplankton *Emiliania* underpins its global distribution.  
1386 *Nature*, 499(7457), 209-213. doi:10.1038/nature12221  
1387 Revell, L. J., & Graham Reynolds, R. (2012). A new Bayesian method for fitting evolutionary  
1388 models to comparative data with intraspecific variation. *Evolution*, 66(9), 2697-2707.  
1389 doi:10.1111/j.1558-5646.2012.01645.x  
1390 Rio, T. G. d., Harmon-Smith, M., Lucas, S. M., Copeland, A., Barry, K., Richardson, P., . . . Pangilinan,  
1391 J. (2006). JGI Sequencing Projects-the process of ensuring efficiency and quality from  
1392 initiation to completion.  
1393 Royo-Llonch, M., Sánchez, P., Ruiz-González, C., Salazar, G., Pedrós-Alió, C., Labadie, K., . . . Acinas,  
1394 S. G. (2020). Ecogenomics of key prokaryotes in the arctic ocean. *bioRxiv*,  
1395 2020.2006.2019.156794. doi:10.1101/2020.06.19.156794  
1396 Sato, S., Nakamura, Y., Kaneko, T., Asamizu, E., & Tabata, S. (1999). Complete structure of the  
1397 chloroplast genome of *Arabidopsis thaliana*. *DNA Res*, 6(5), 283-290. doi:  
1398 10.1093/dnares/6.5.283  
1399 Simão, F. A., Waterhouse, R. M., Ioannidis, P., Kriventseva, E. V., & Zdobnov, E. M. (2015). BUSCO:  
1400 assessing genome assembly and annotation completeness with single-copy orthologs.  
1401 *Bioinformatics*, 31(19), 3210-3212. doi:10.1093/bioinformatics/btv351  
1402 Song, Y., Liu, L., & Ma, X. (2019). CbAdh1 improves plant cold tolerance. *Plant Signal Behav*,  
1403 14(7), 1612680. doi:10.1080/15592324.2019.1612680  
1404 Stamatakis, A. (2014). RAxML version 8: a tool for phylogenetic analysis and post-analysis of  
1405 large phylogenies. *Bioinformatics*, 30(9), 1312-1313.  
1406 doi:10.1093/bioinformatics/btu033  
1407 Stephens, T. G., González-Pech, R. A., Cheng, Y., Mohamed, A. R., Burt, D. W., Bhattacharya, D., . . .  
1408 Chan, C. X. (2020). Genomes of the dinoflagellate *Polarella glacialis* encode tandemly  
1409 repeated single-exon genes with adaptive functions. *BMC Biol*, 18(1), 56.  
1410 doi:10.1186/s12915-020-00782-8  
1411 Stephens, T. G., Ragan, M. A., Bhattacharya, D., & Chan, C. X. (2018). Core genes in diverse  
1412 dinoflagellate lineages include a wealth of conserved dark genes with unknown  
1413 functions. *Sci Rep*, 8(1), 17175. doi:10.1038/s41598-018-35620-z  
1414 Stewart, A., Rioux, D., Boyer, F., Gielly, L., Pompanon, F., Saillard, A., . . . Coissac, E. (2021).  
1415 Altitudinal zonation of green algae biodiversity in the French Alps. *Frontiers in Plant*  
1416 *Science*, 12(1066). doi:10.3389/fpls.2021.679428  
1417 Stiller, J. W., Schreiber, J., Yue, J., Guo, H., Ding, Q., & Huang, J. (2014). The evolution of  
1418 photosynthesis in chromist algae through serial endosymbioses. *Nat Commun*, 5, 5764.  
1419 doi:10.1038/ncomms6764  
1420 Strassert, J. F. H., Irisarri, I., Williams, T. A., & Burki, F. (2021). A molecular timescale for  
1421 eukaryote evolution with implications for the origin of red algal-derived plastids. *Nat*  
1422 *Commun*, 12(1), 1879. doi:10.1038/s41467-021-22044-z  
1423 Sunagawa, S., Coelho, L. P., Chaffron, S., Kultima, J. R., Labadie, K., Salazar, G., . . . coordinators, T.  
1424 O. (2015). Ocean plankton. Structure and function of the global ocean microbiome.  
1425 *Science*, 348(6237), 1261359. doi:10.1126/science.1261359  
1426 Suzek, B. E., Huang, H. Z., McGarvey, P., Mazumder, R., & Wu, C. H. (2007). UniRef: comprehensive  
1427 and non-redundant UniProt reference clusters. *Bioinformatics*, 23(10), 1282-1288.  
1428 doi:10.1093/bioinformatics/btm098  
1429 Søggaard, D. H., Sorrell, B. K., Sejr, M. K., Andersen, P., Rysgaard, S., Hansen, P. J., . . . Lund-Hansen,  
1430 L. C. (2021). An under-ice bloom of mixotrophic haptophytes in low nutrient and  
1431 freshwater-influenced Arctic waters. *Sci Rep*, 11, 2915. doi: 10.1038/s41598-021-82413-y  
1432 Terrado, R., Monier, A., Edgar, R., & Lovejoy, C. (2015). Diversity of nitrogen assimilation  
1433 pathways among microbial photosynthetic eukaryotes. *Journal of Phycology*, 51(3), 490-  
1434 506. doi:10.1111/jpy.12292  
1435 Turchetti, B., Thomas Hall, S. R., Connell, L. B., Branda, E., Buzzini, P., Theelen, B., . . . Boekhout, T.  
1436 (2011). Psychrophilic yeasts from Antarctica and European glaciers: description of



1437 *Glaciozyma* gen. nov., *Glaciozyma martinii* sp. nov. and *Glaciozyma watsonii* sp. nov.  
1438 *Extremophiles*, 15(5), 573-586. doi:10.1007/s00792-011-0388-x  
1439 Vancaester, E., Depuydt, T., Osuna-Cruz, C. M., & Vandepoele, K. (2020). Comprehensive and  
1440 functional analysis of horizontal gene transfer events in diatoms. *Mol Biol Evol*, 37(11),  
1441 3243-3257. doi:10.1093/molbev/msaa182  
1442 Vance, T. D. R., Bayer-Giraldi, M., Davies, P. L., & Mangiagalli, M. (2019). Ice-binding proteins and  
1443 the 'domain of unknown function' 3494 family. *The FEBS Journal*, 286(5), 855-873.  
1444 doi:10.1111/febs.14764  
1445 Vaultot, D., Le Gall, F., Marie, D., Guillou, L., & Partensky, F. (2004). The Roscoff Culture Collection  
1446 (RCC): a collection dedicated to marine picoplankton. *Nova Hedwigia*, 79(1-2), 32.  
1447 Vorobev, A., Dupouy, M., Carradec, Q., Delmont, T. O., Annamalé, A., Wincker, P., & Pelletier, E.  
1448 (2020). Transcriptome reconstruction and functional analysis of eukaryotic marine  
1449 plankton communities via high-throughput metagenomics and metatranscriptomics.  
1450 *Genome Res*, 30(4), 647-659. doi:10.1101/gr.253070.119  
1451 Wang, D. M., Ning, K., Li, J., Hu, J. Q., Han, D. X., Wang, H., . . . Xu, J. (2014). *Nannochloropsis*  
1452 genomes reveal evolution of microalgal oleaginous traits. *Plos Genetics*, 10(1).  
1453 doi:10.1371/journal.pgen.1004094  
1454 Wang, H. C., Susko, E., & Roger, A. J. (2019). The relative importance of modeling site pattern  
1455 heterogeneity versus partition-wise heterotachy in phylogenomic inference. *Syst Biol*,  
1456 68(6), 1003-1019. doi:10.1093/sysbio/syz021  
1457 Wang, Y., Pang, C., Li, X., Hu, Z., Lv, Z., Zheng, B., & Chen, P. (2017). Identification of tRNA  
1458 nucleoside modification genes critical for stress response and development in rice and  
1459 *Arabidopsis*. *BMC Plant Biol*, 17(1), 261. doi:10.1186/s12870-017-1206-0  
1460 Wheeler, D. L., Barrett, T., Benson, D. A., Bryant, S. H., Canese, K., Chetvernin, V., . . . Yaschenko, E.  
1461 (2006). Database resources of the National Center for Biotechnology Information.  
1462 *Nucleic Acids Res*, 34(Database issue), D173-180. doi:10.1093/nar/gkj158  
1463 Worden, A. Z., Lee, J. H., Mock, T., Rouze, P., Simmons, M. P., Aerts, A. L., . . . Grigoriev, I. V. (2009).  
1464 Green evolution and dynamic adaptations revealed by genomes of the marine  
1465 picoeukaryotes *Micromonas*. *Science*, 324(5924), 268-272. doi:10.1126/science.1167222  
1466 Zhang, X., Cvetkovska, M., Morgan-Kiss, R., Hüner, N. P. A., & Smith, D. R. (2021). Draft genome  
1467 sequence of the Antarctic green alga *Chlamydomonas* sp. UWO241. *iScience*, 24(2),  
1468 102084. doi:10.1016/j.isci.2021.102084  
1469 Zhang, Z., Qu, C., Zhang, K., He, Y., Zhao, X., Yang, L., . . . Miao, J. (2020). Adaptation to extreme  
1470 Antarctic environments revealed by the genome of a sea ice green alga. *Curr Biol*, 30(17),  
1471 3330-3341.e3337. doi:10.1016/j.cub.2020.06.029

1472



(i) 18S v4

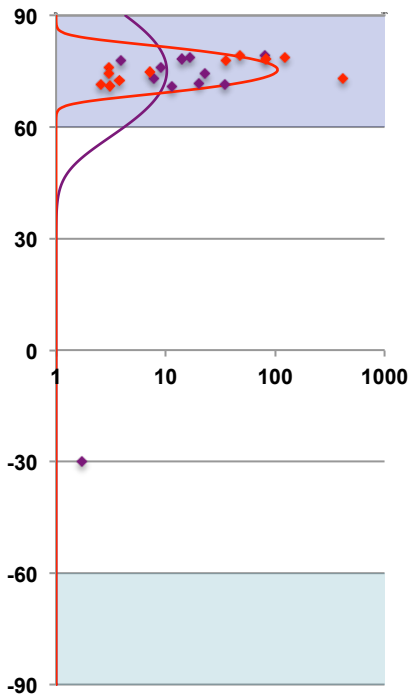

(ii) 18Sv9

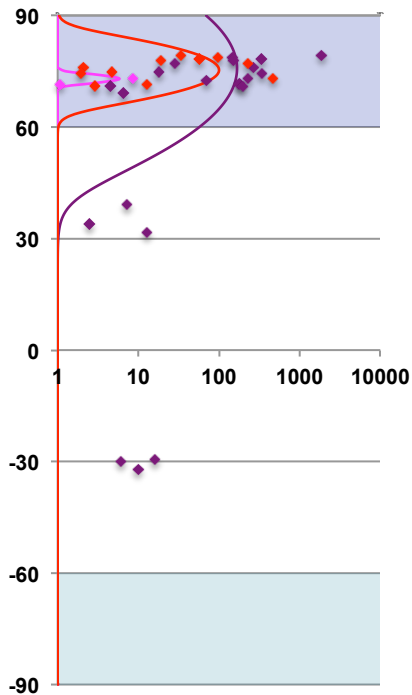

(iii) 16S v4v5

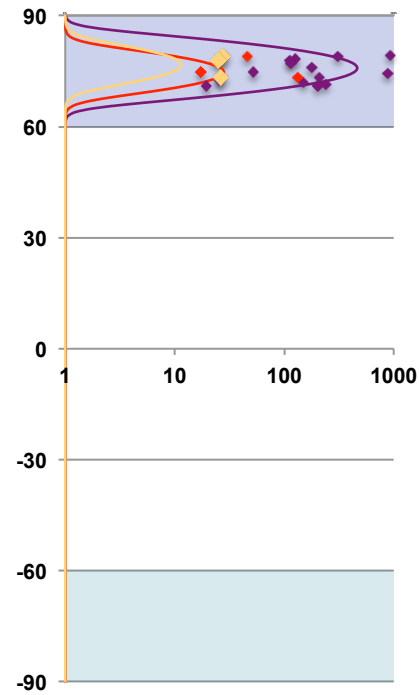

Arctic  
Antarctic/  
Southern Ocean

Relative number mapped ribotypes (parts per million total ribotypes)

*Baffinella* sp. CCMP2293 • *Pavlova* sp. CCMP2436 • Novel pelagophyte CCMP2097 • *Ochromonas* sp. CCMP2298

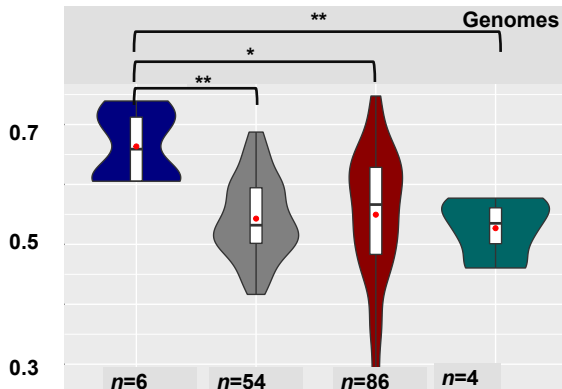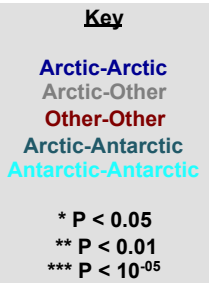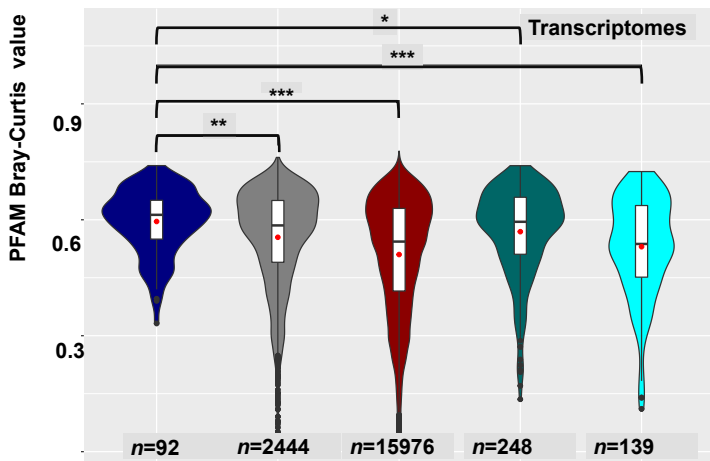

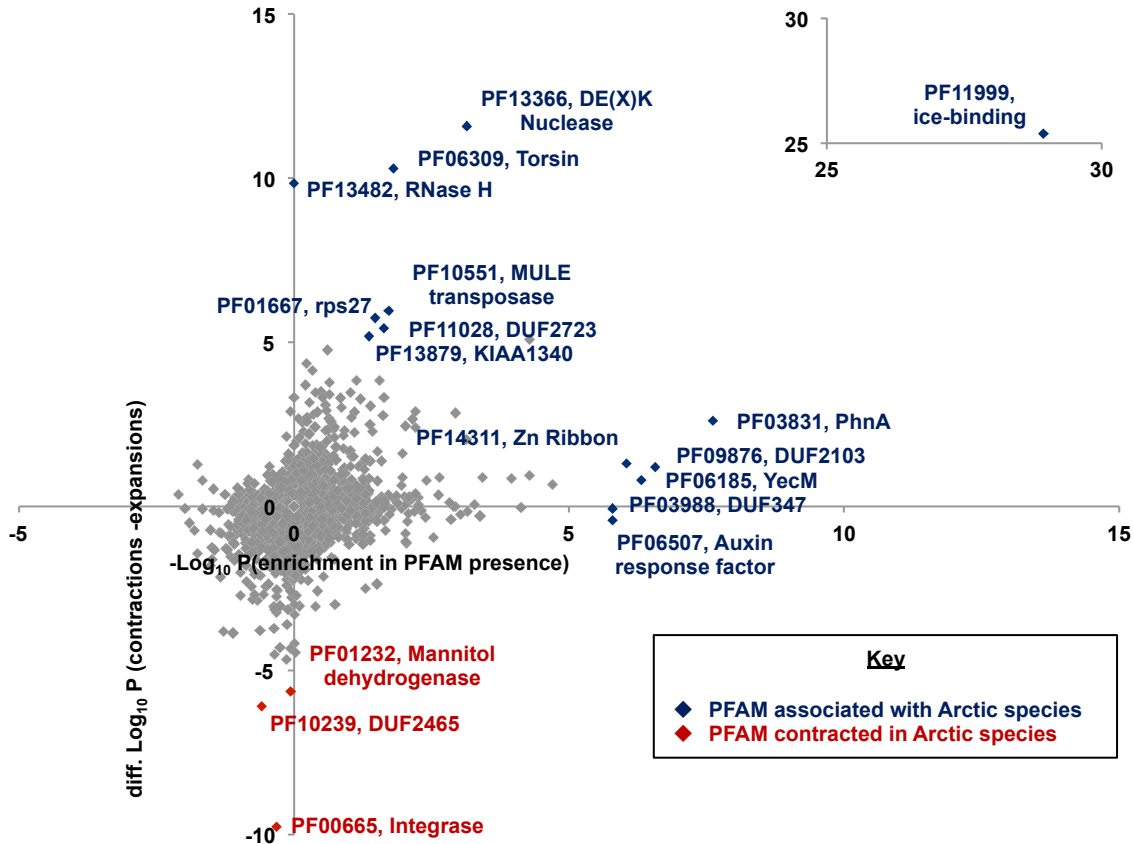

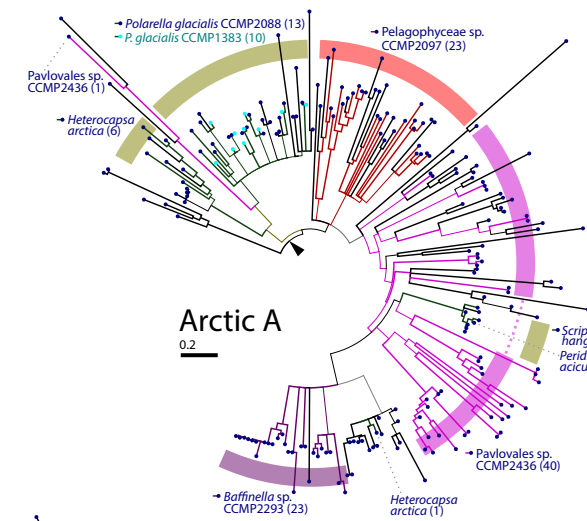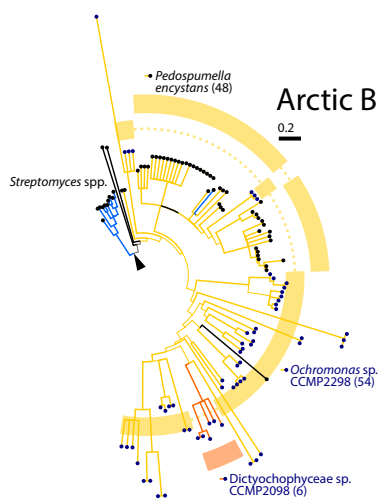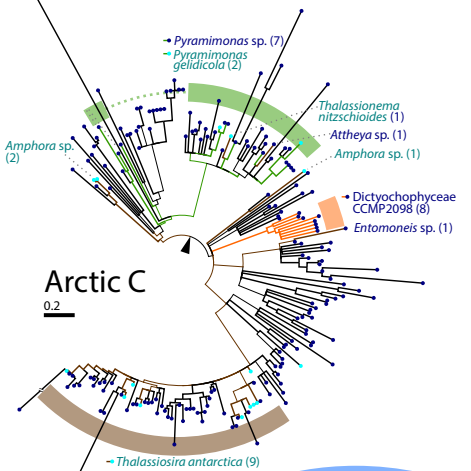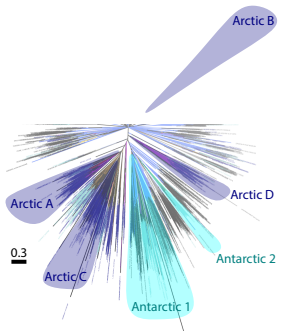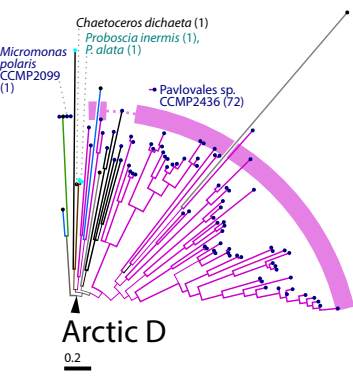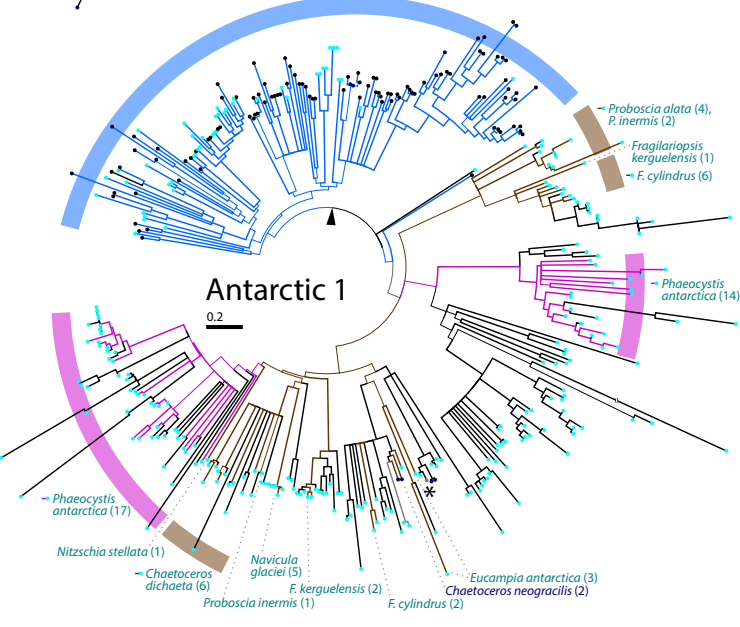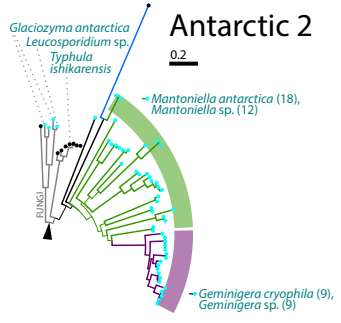

**outgroup**

- Diatoms
- Pelagophytes
- Dictyochophytes
- Chrysophytes
- Cryptomonads
- Haptophytes
- Chlorophytes
- Dinoflagellates
- Other eukaryotes
- MATOU
- Bacteria

**Arctic** (blue circle)

**Antarctic** (cyan circle)

**Bi-polar (Tara data)** (grey circle with asterisk)

**Other sites** (black circle)

**substitutions/site**

Consensus of JTT and WAG topologies:

- no
- yes

▲ **clade root**

Median enrichment in LAST best hits, Arctic v non-Arctic query

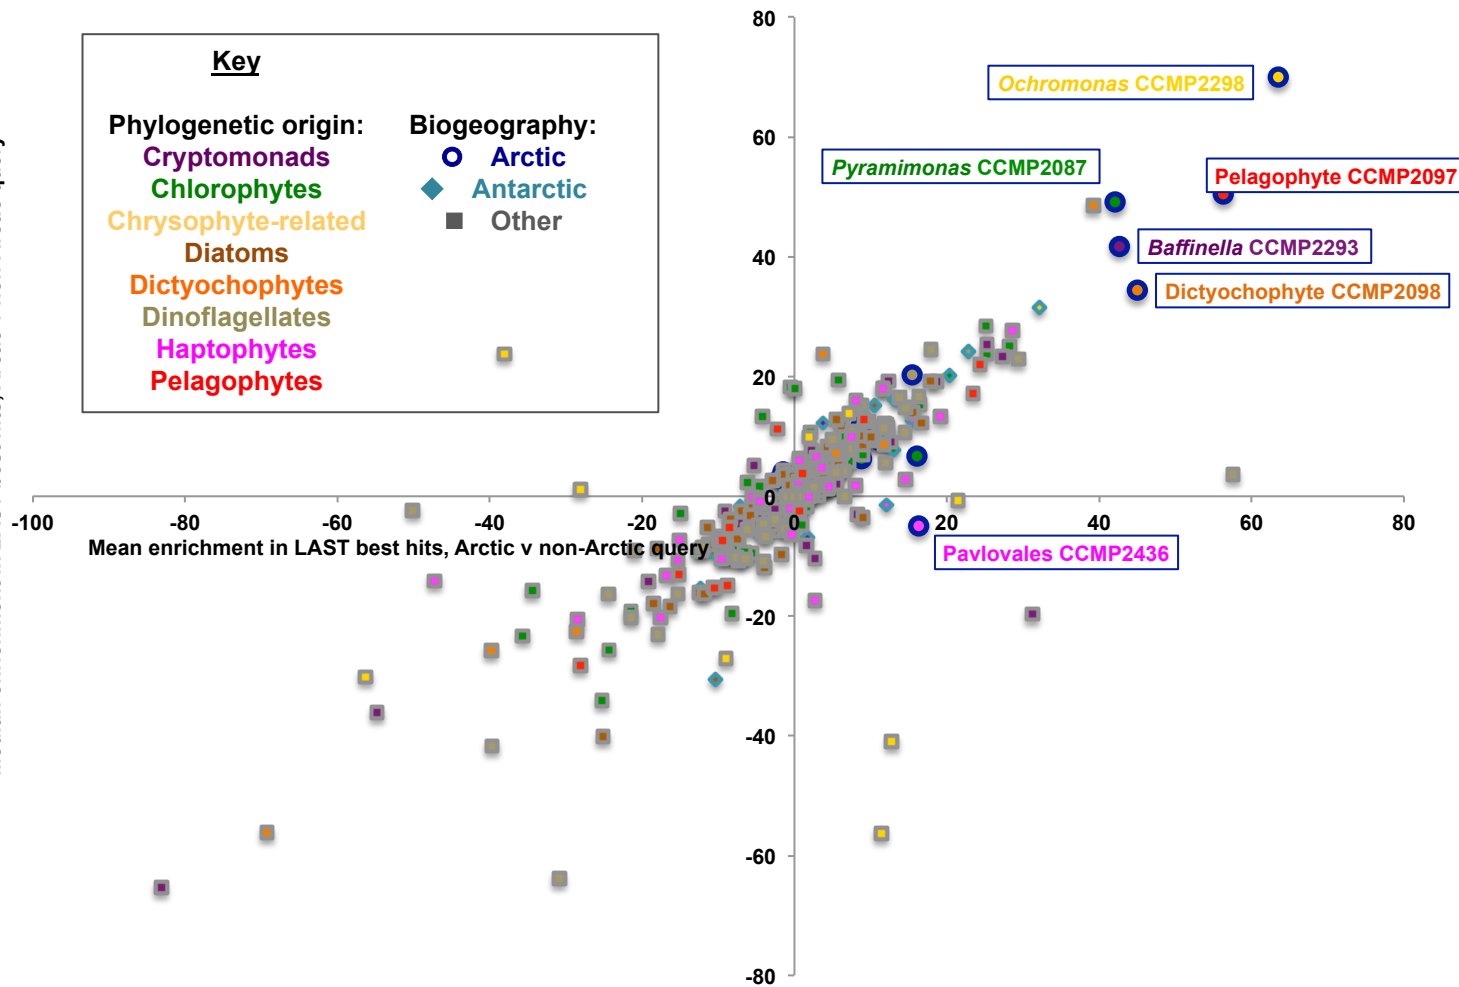

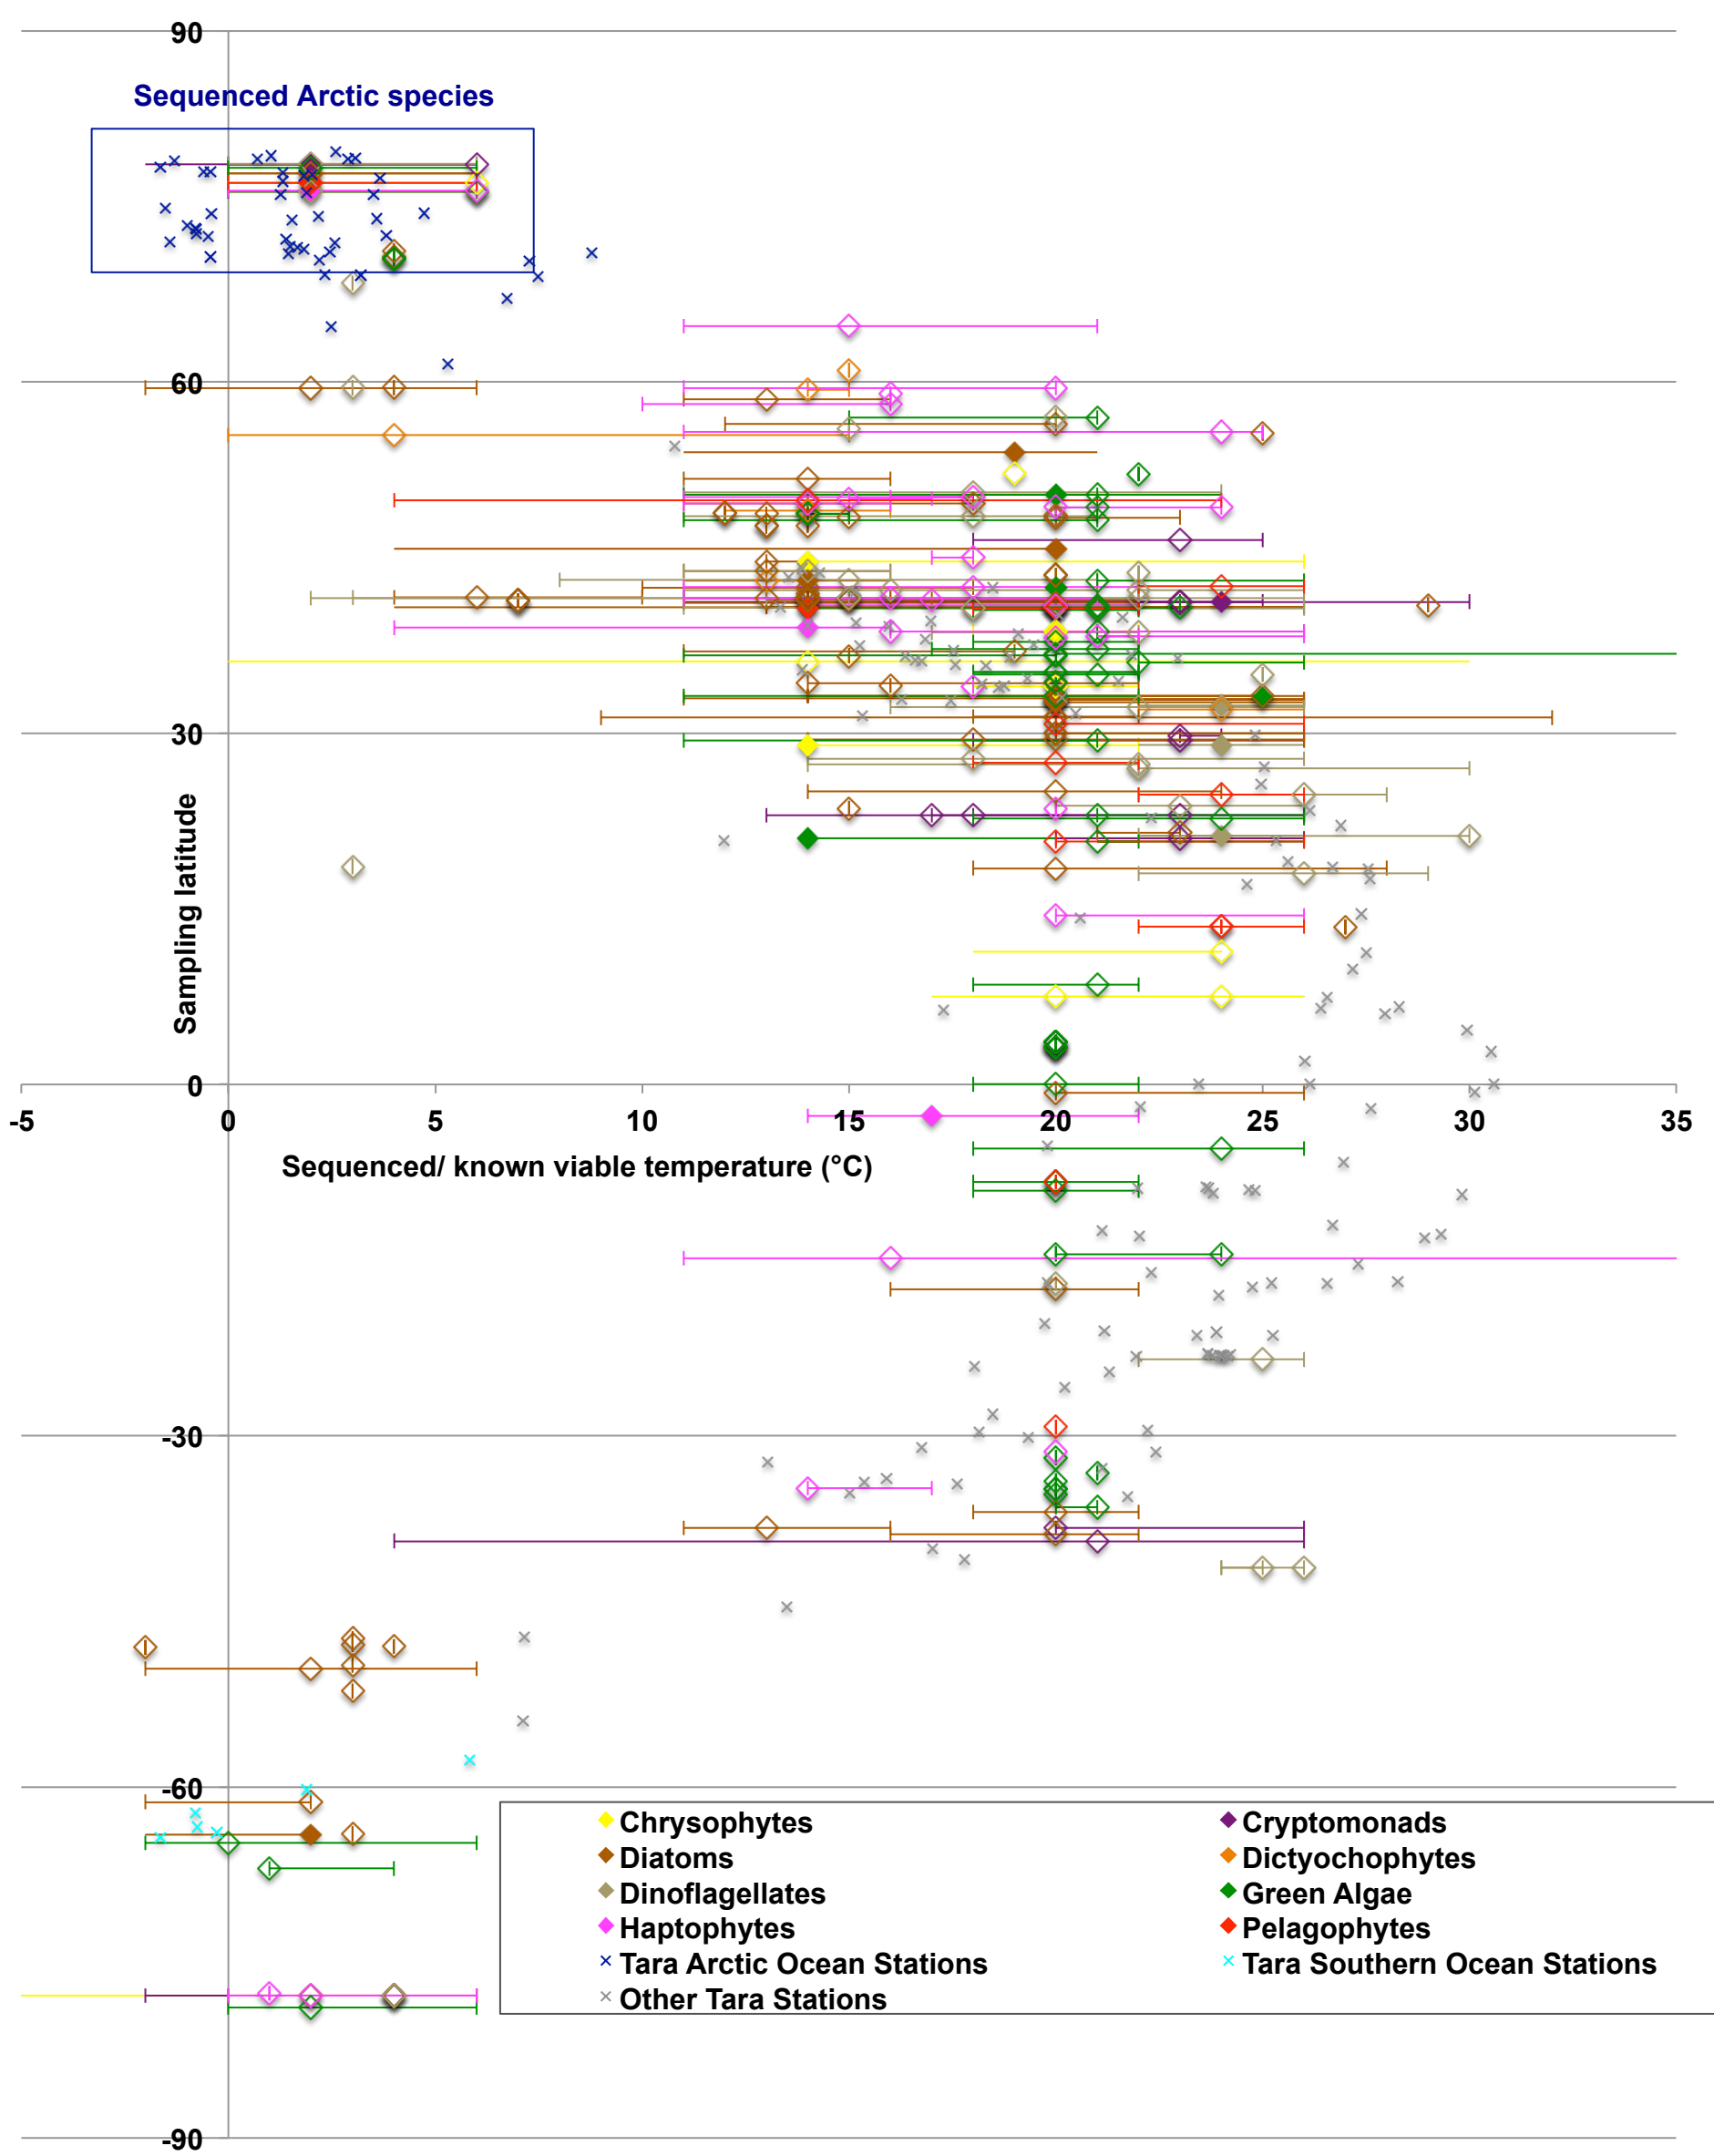



(i) 18S tree

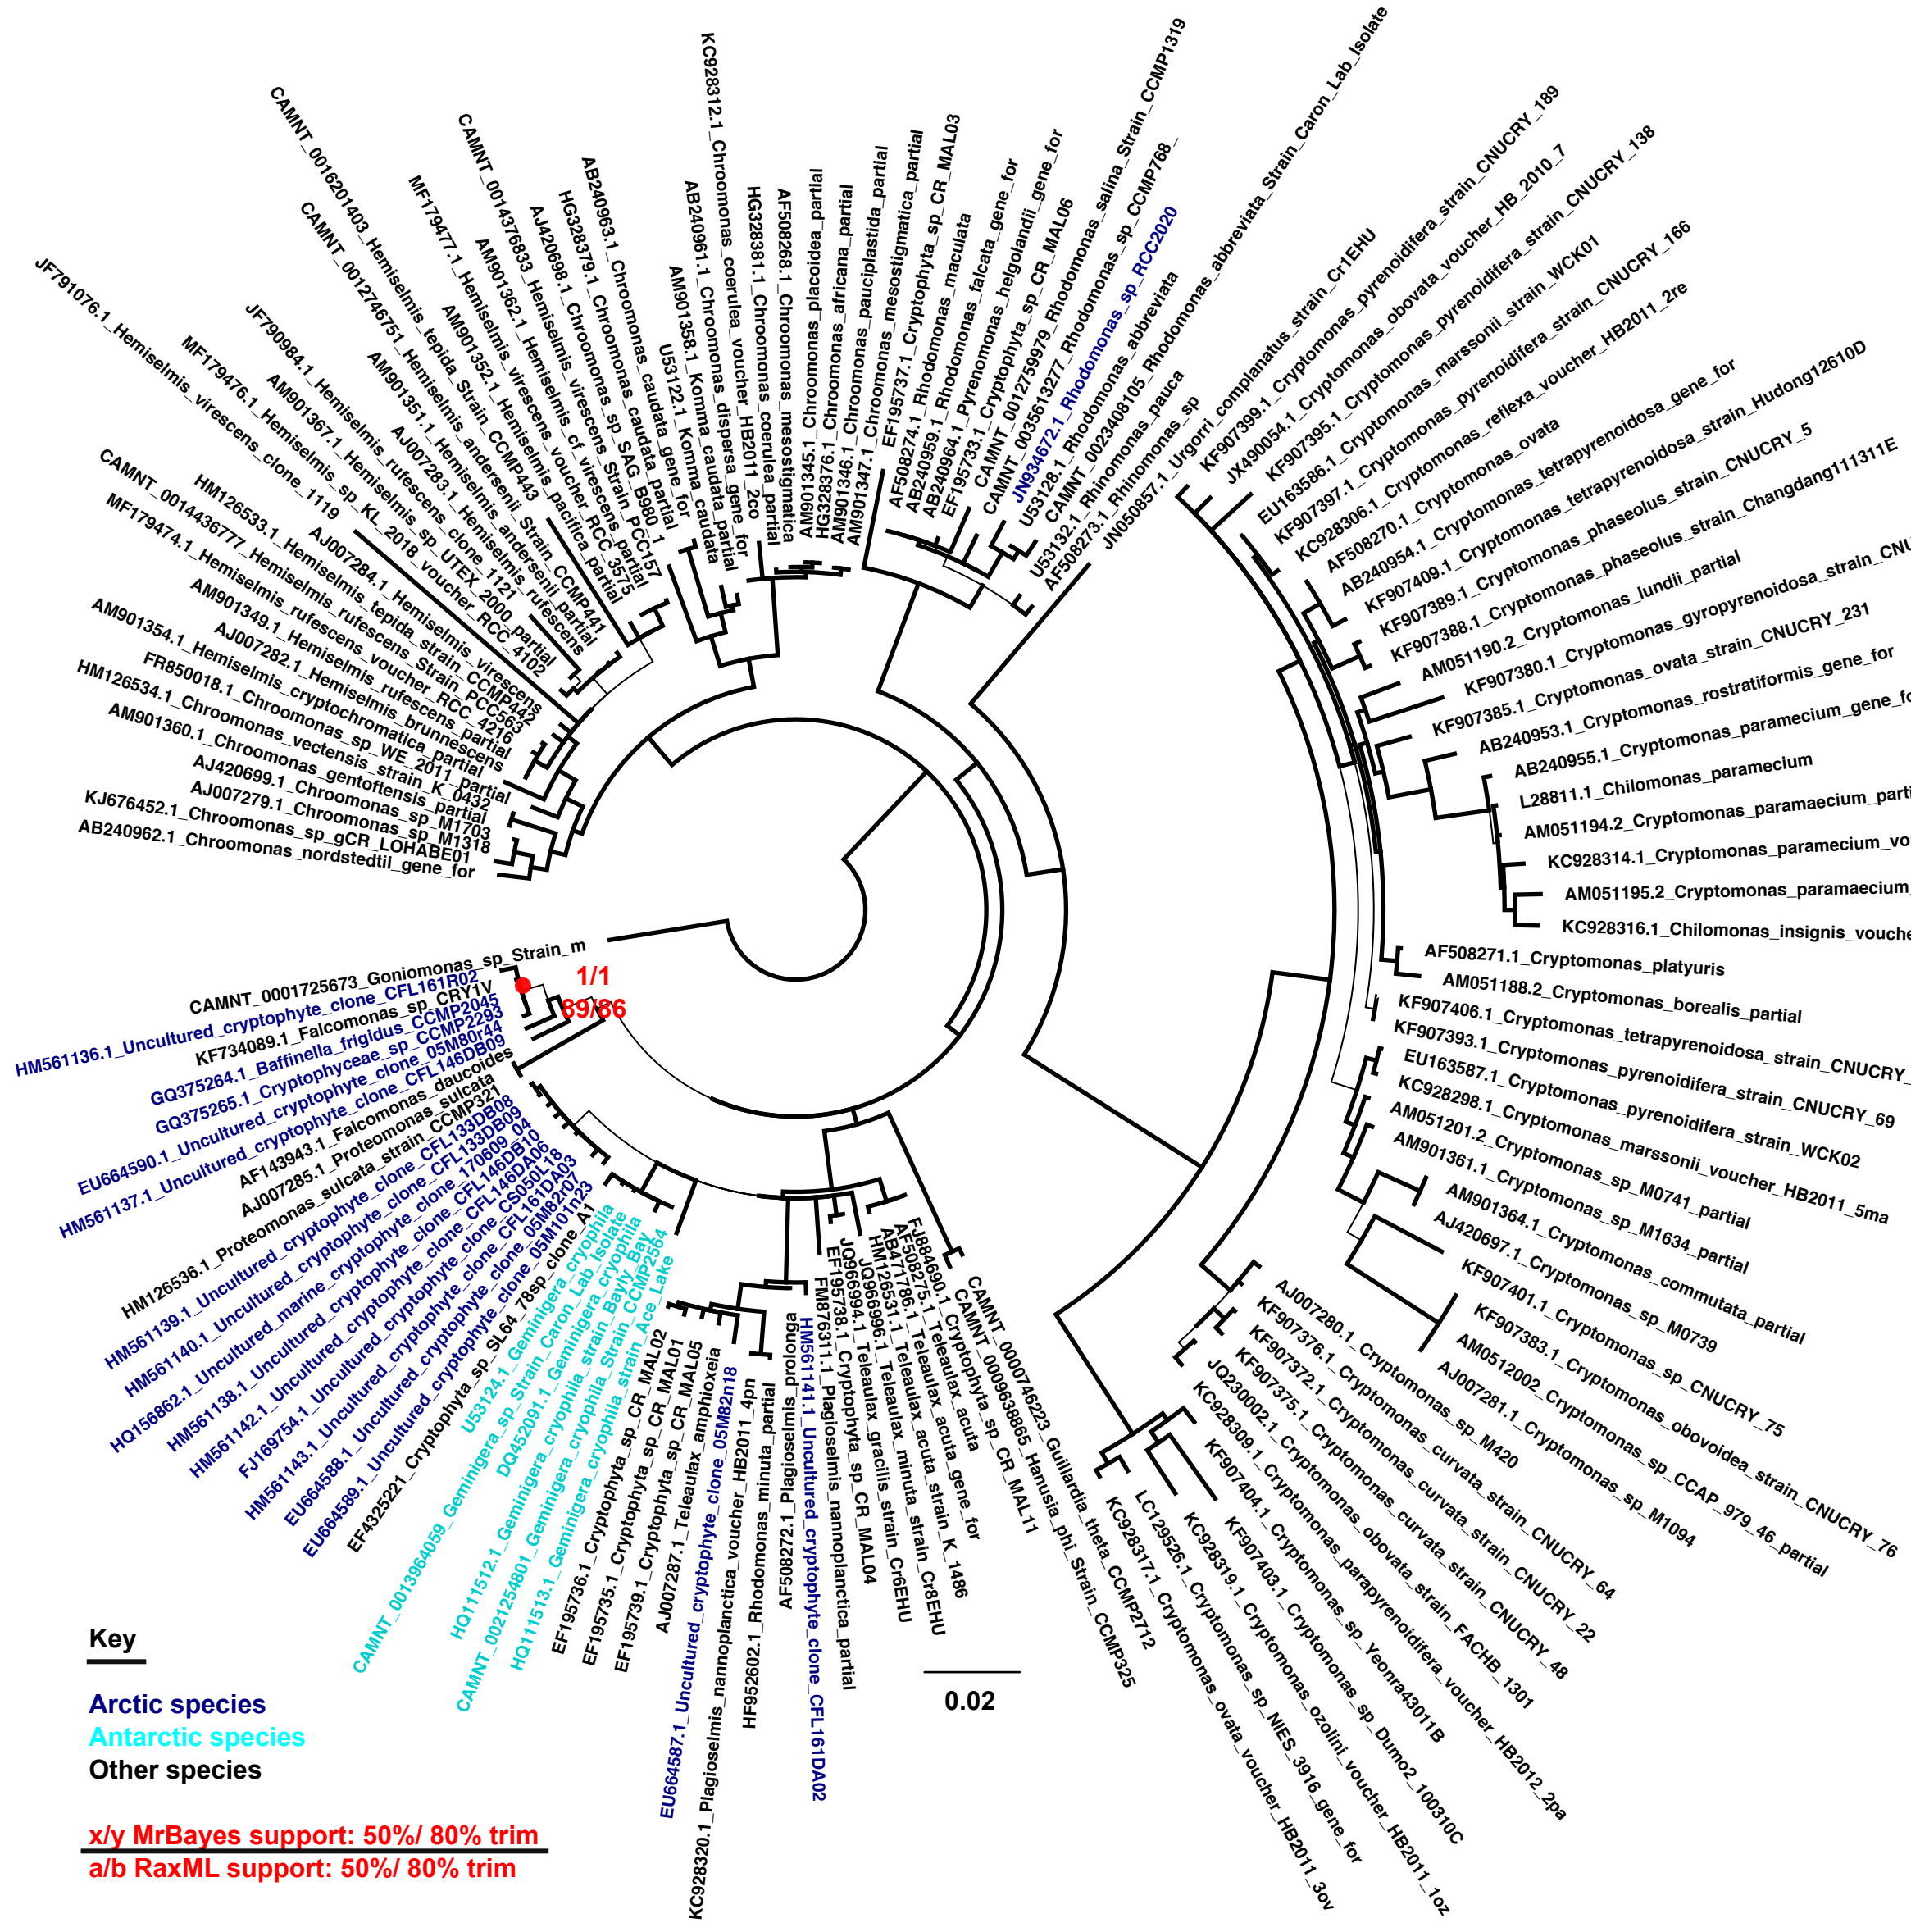

(ii) 16S tree

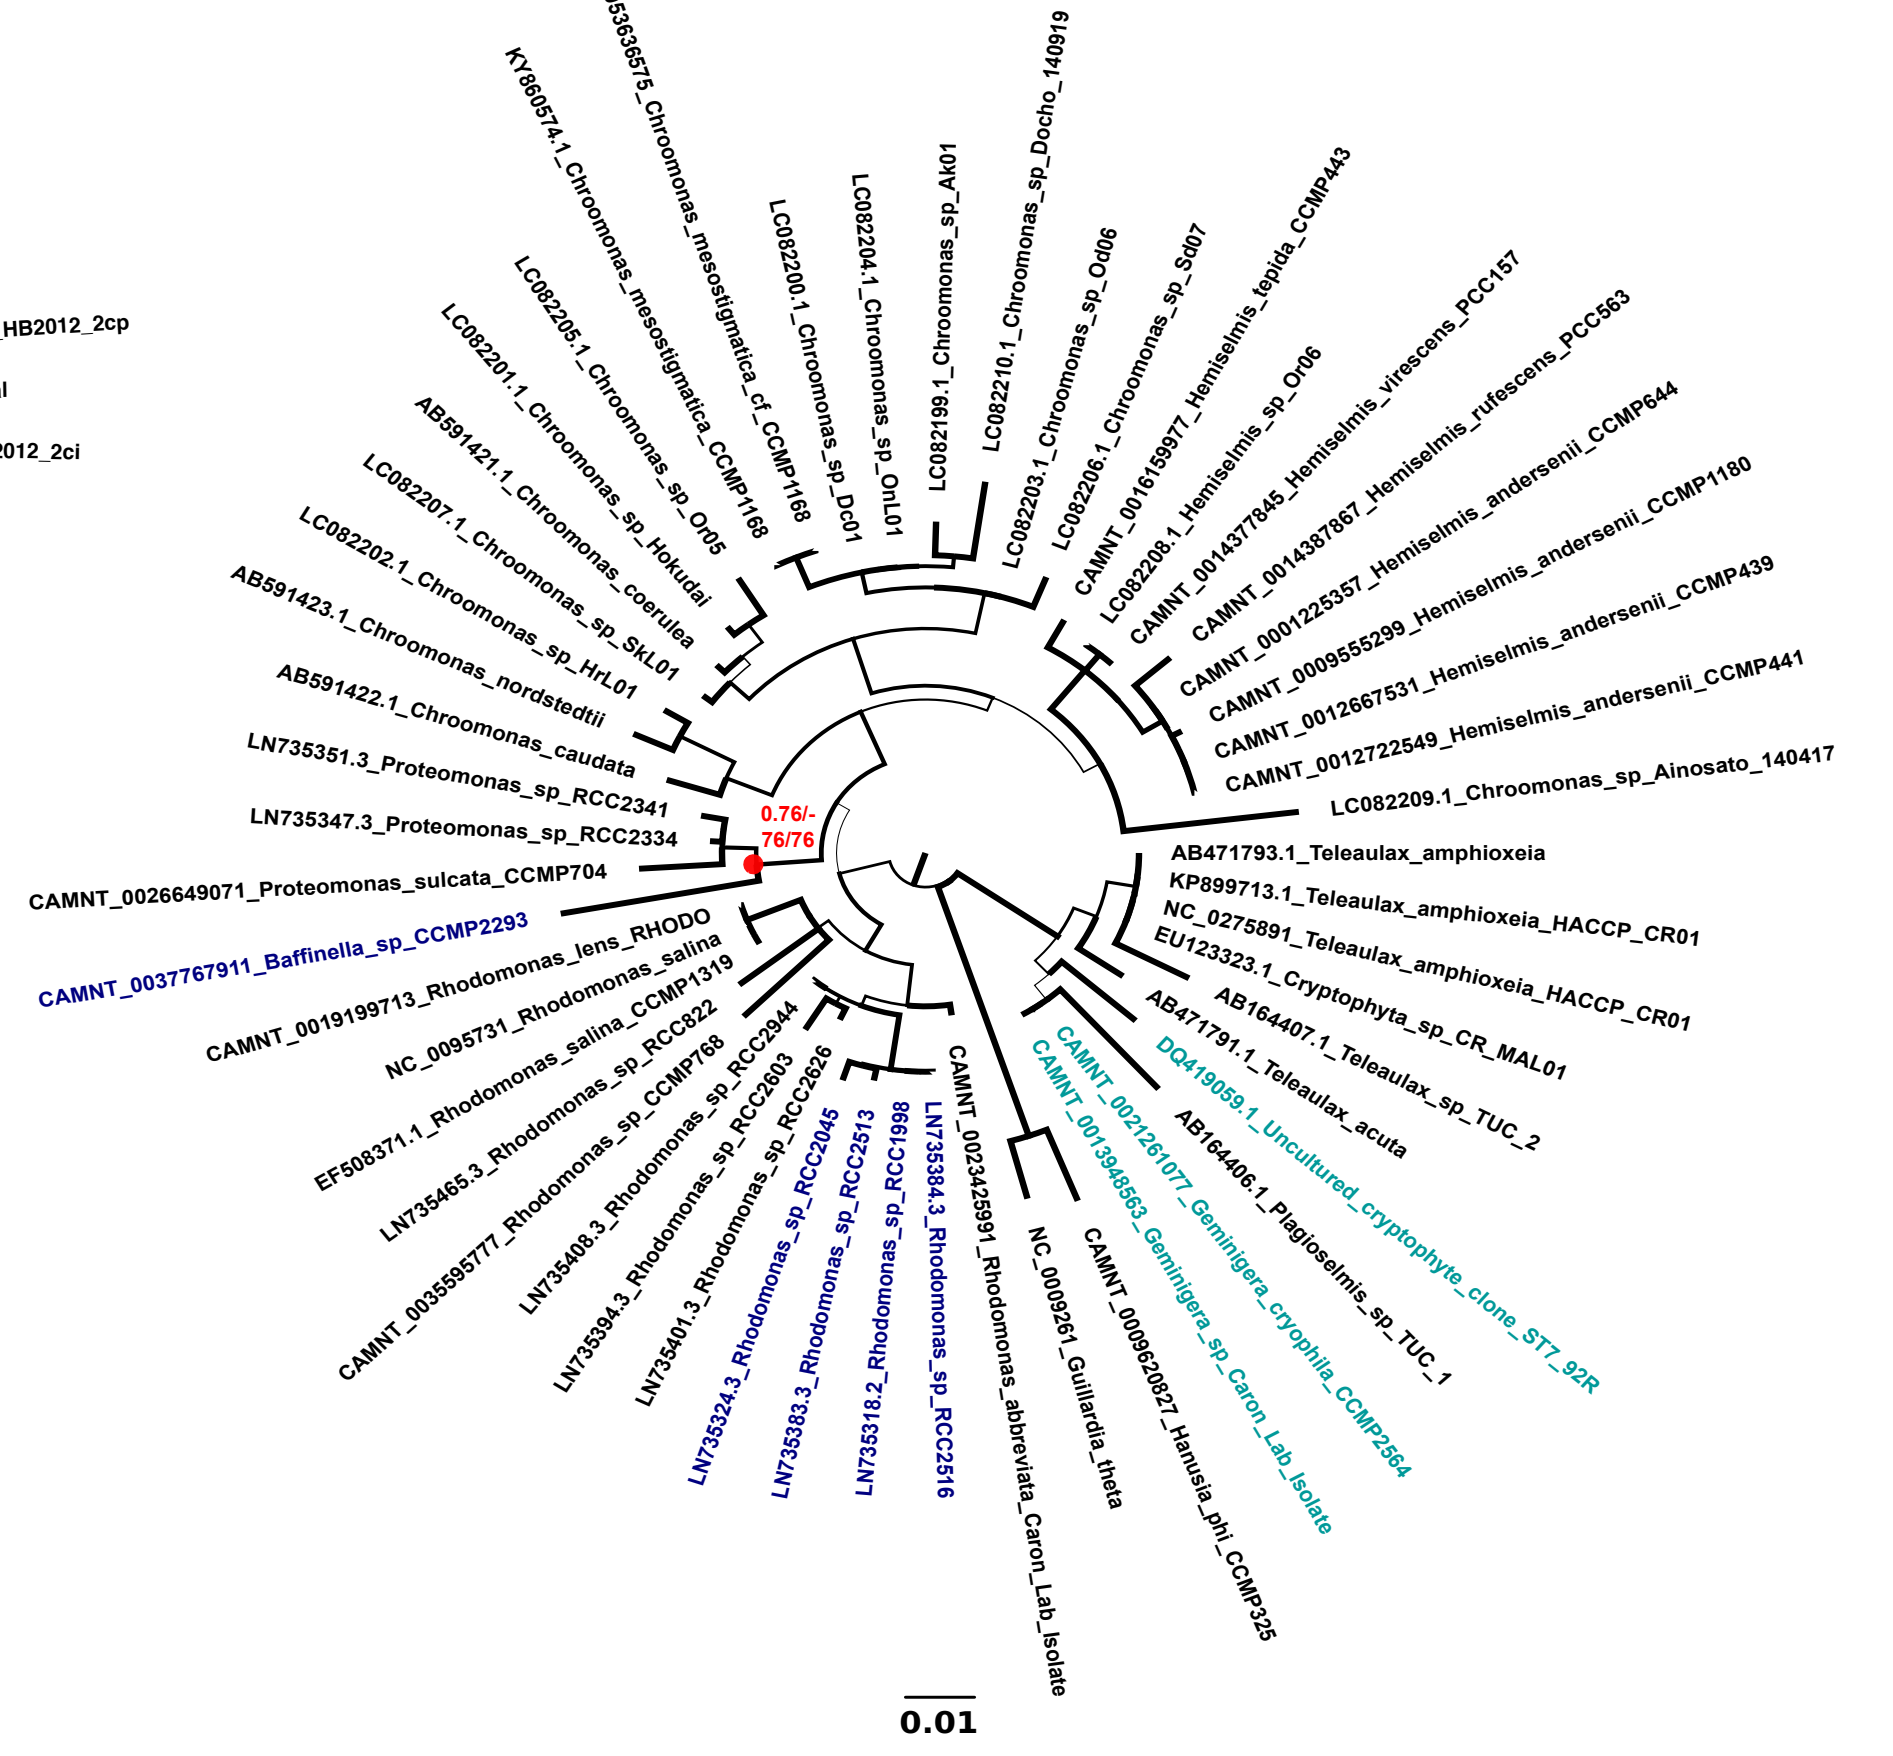

(i) 18S tree

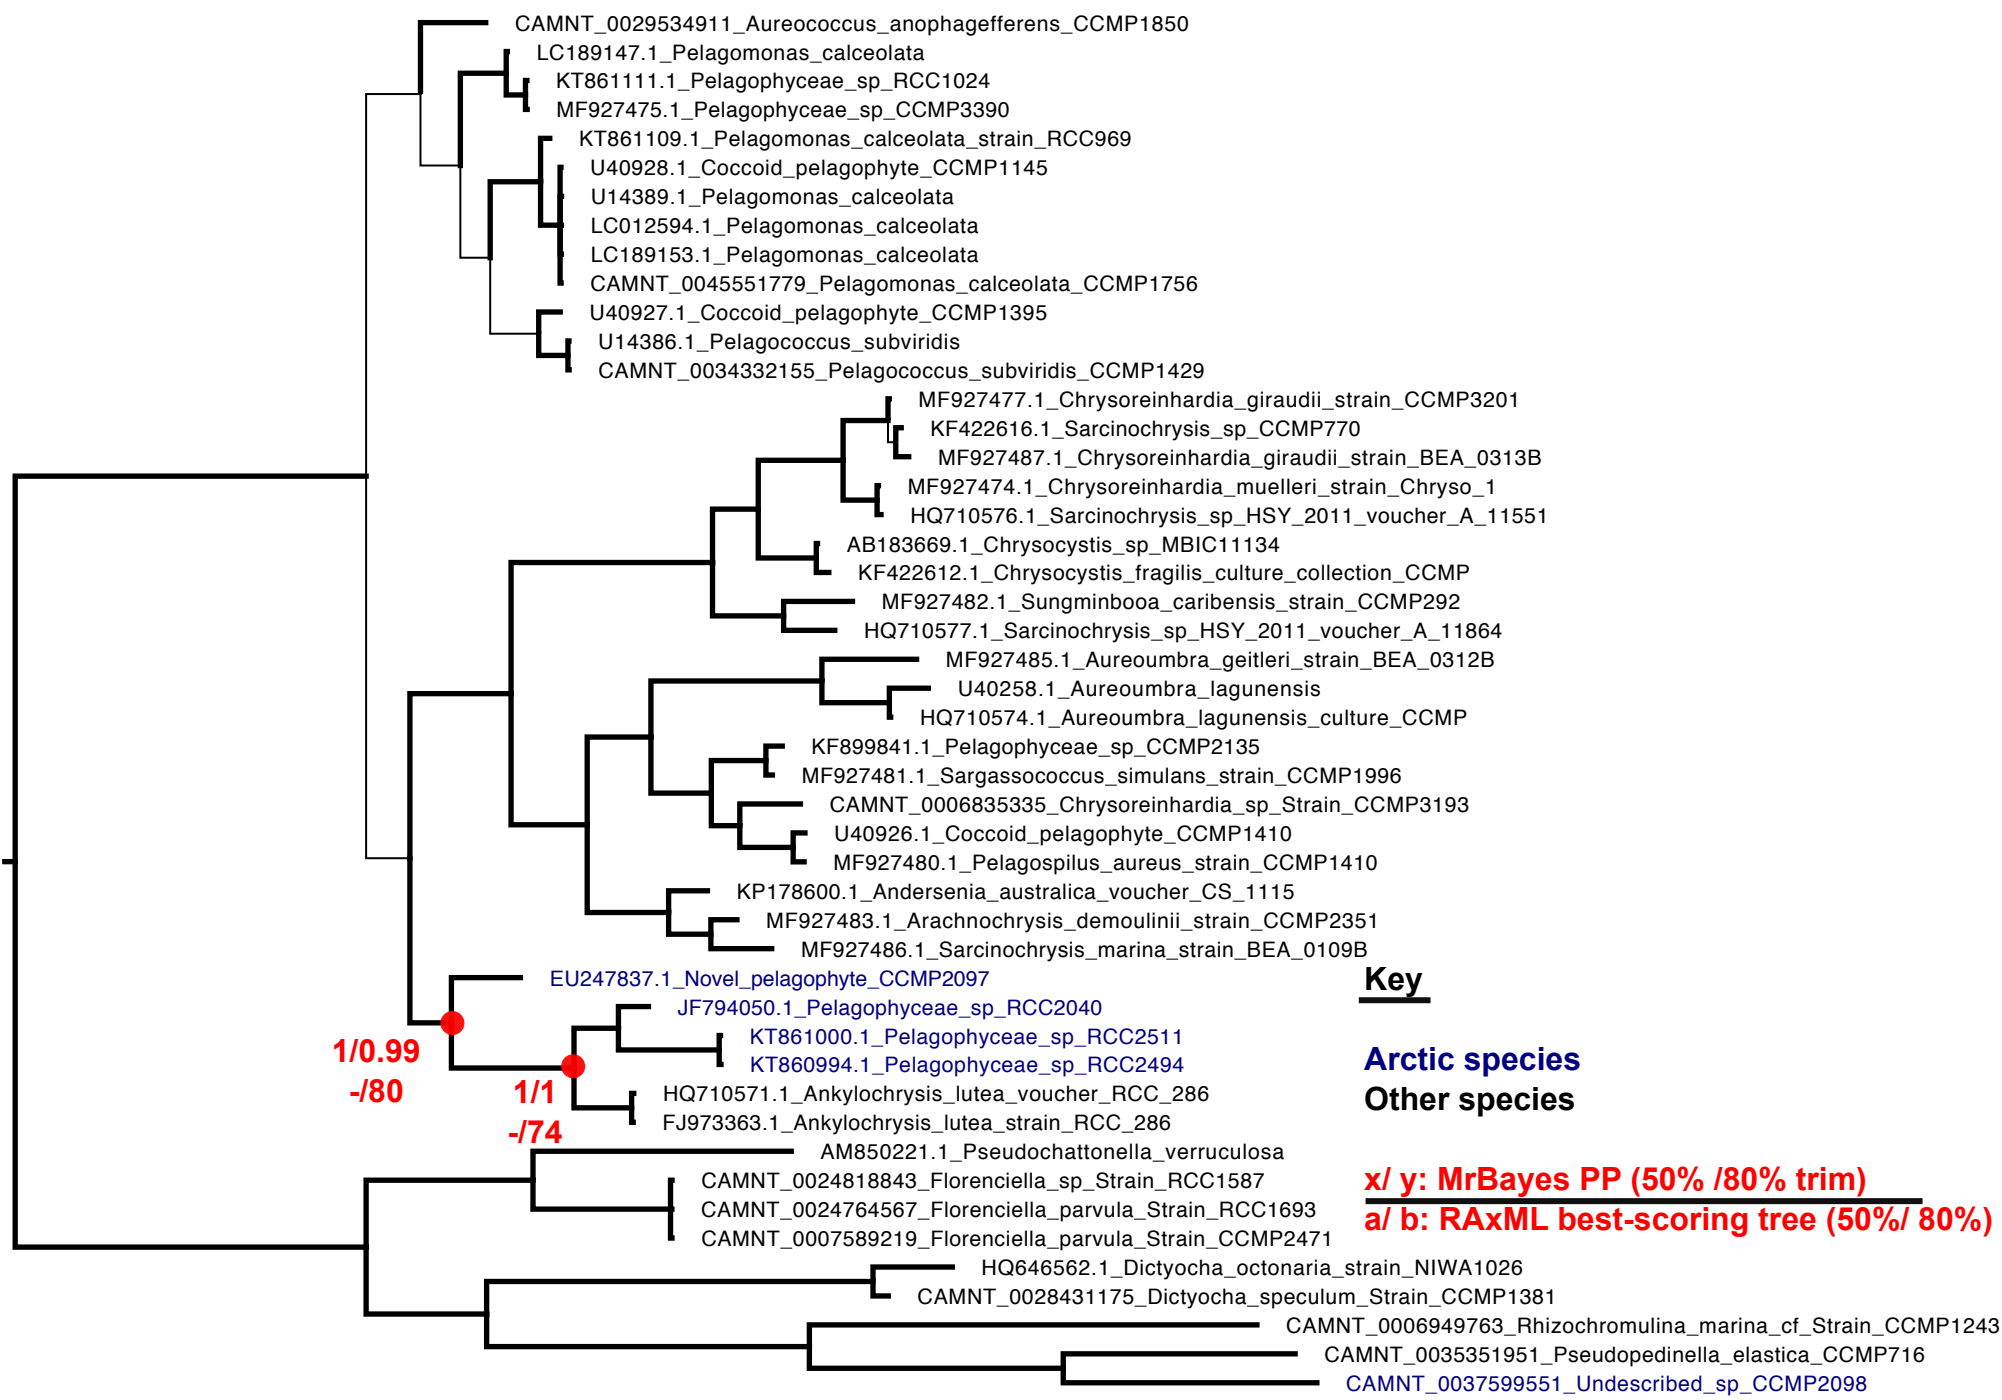

(ii) 16S tree

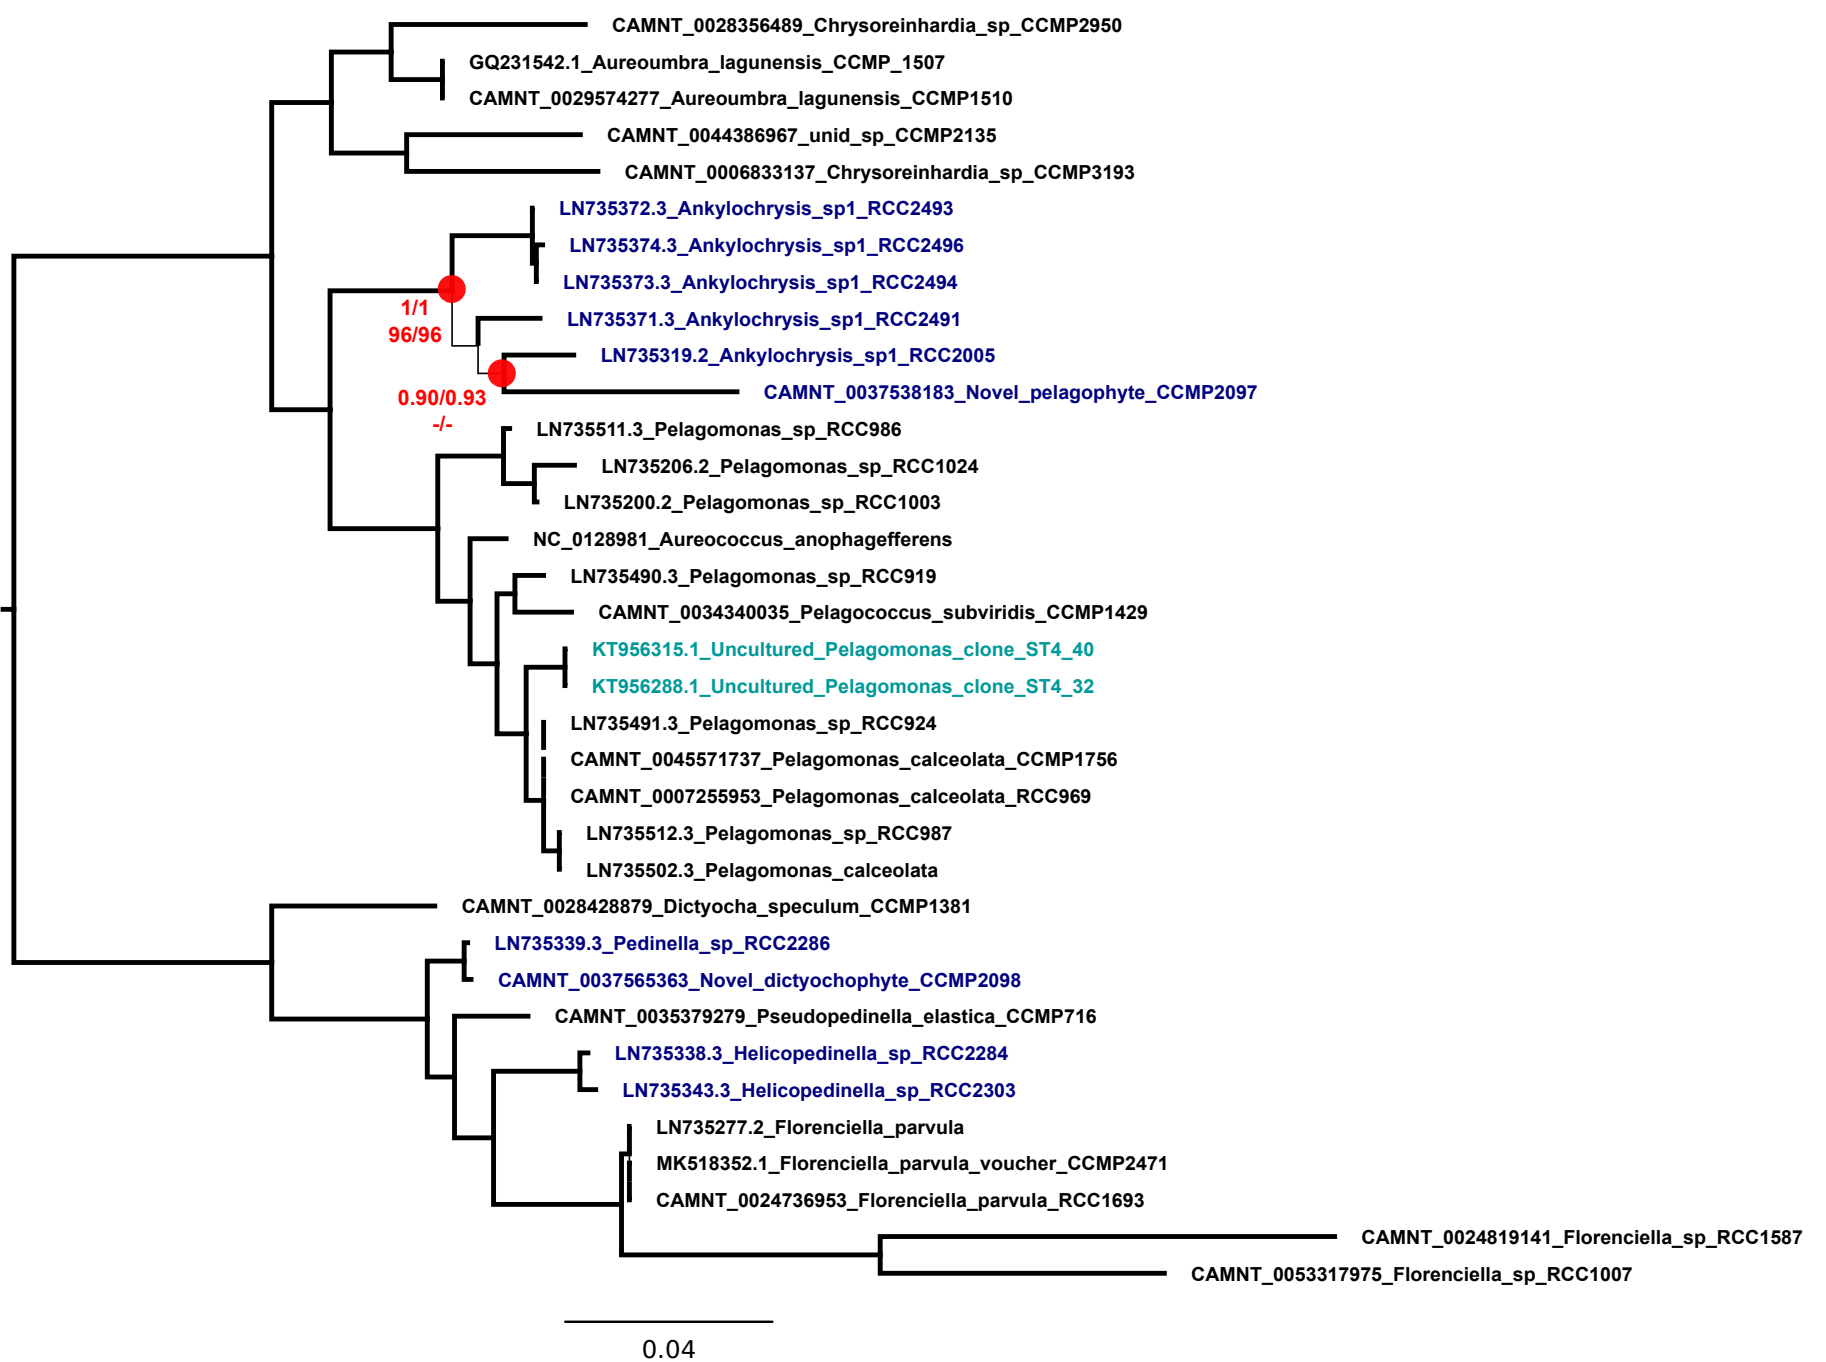

(i) 18S tree

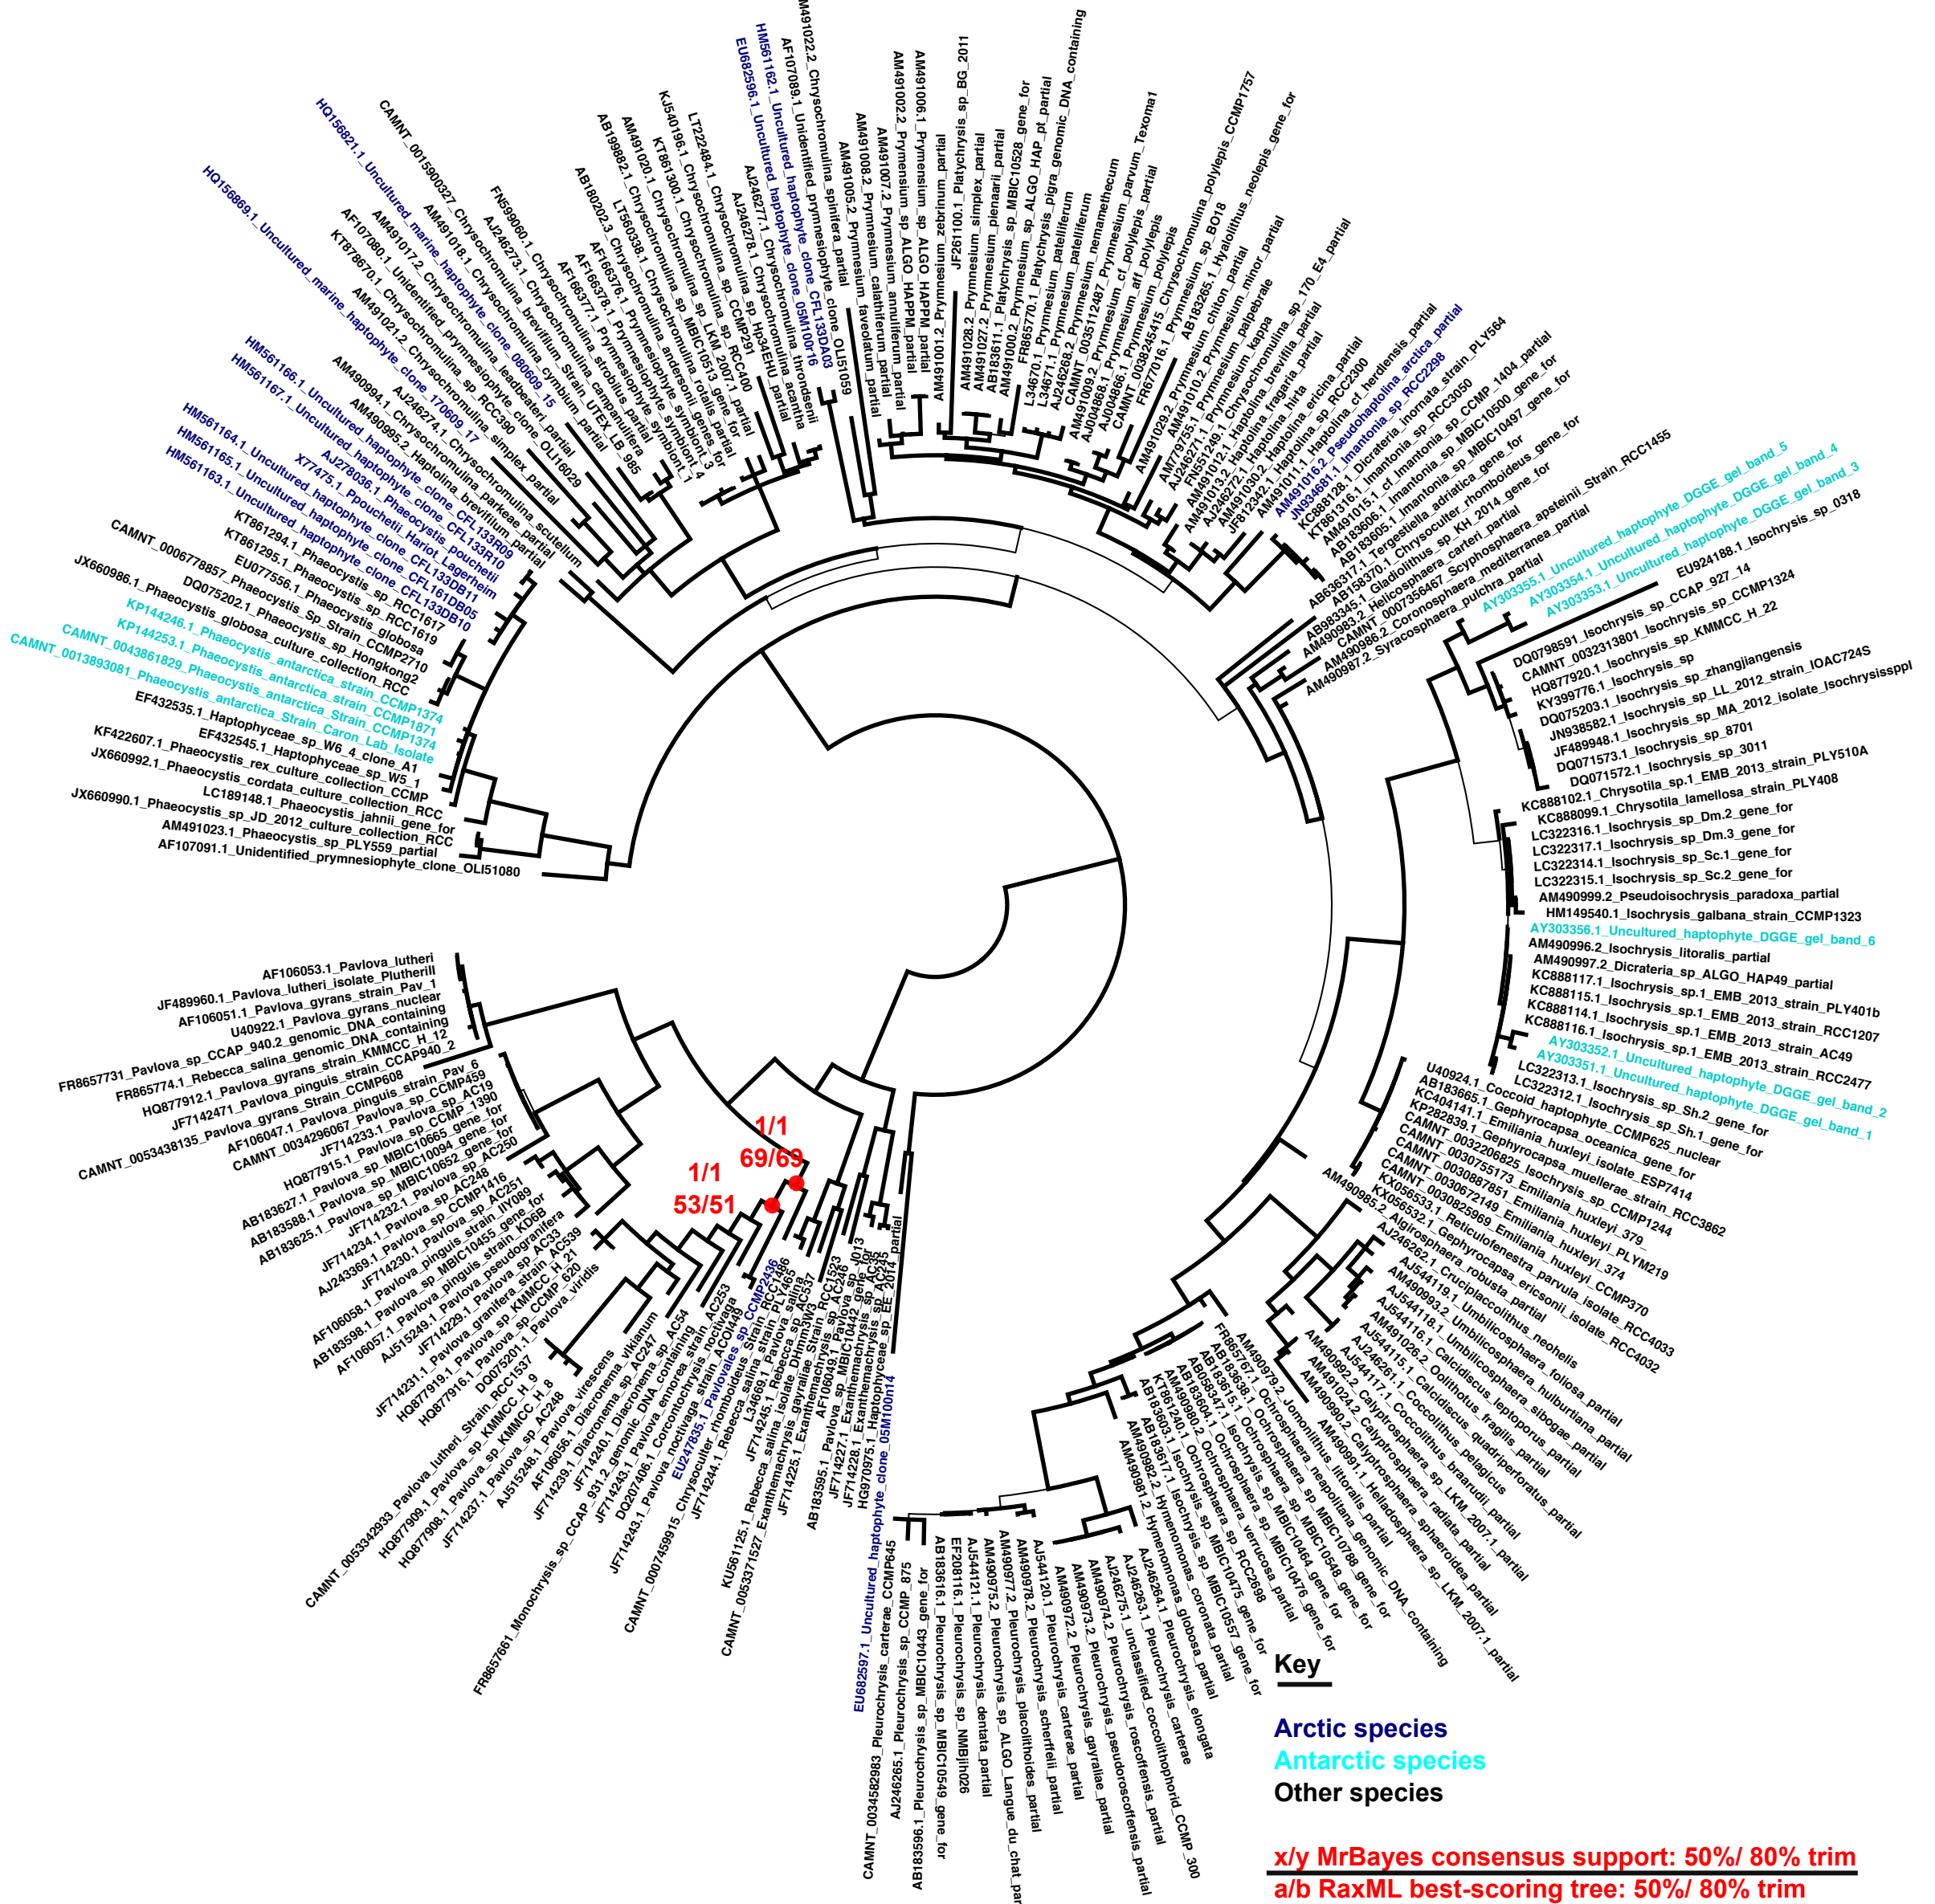

(ii) 16S tree

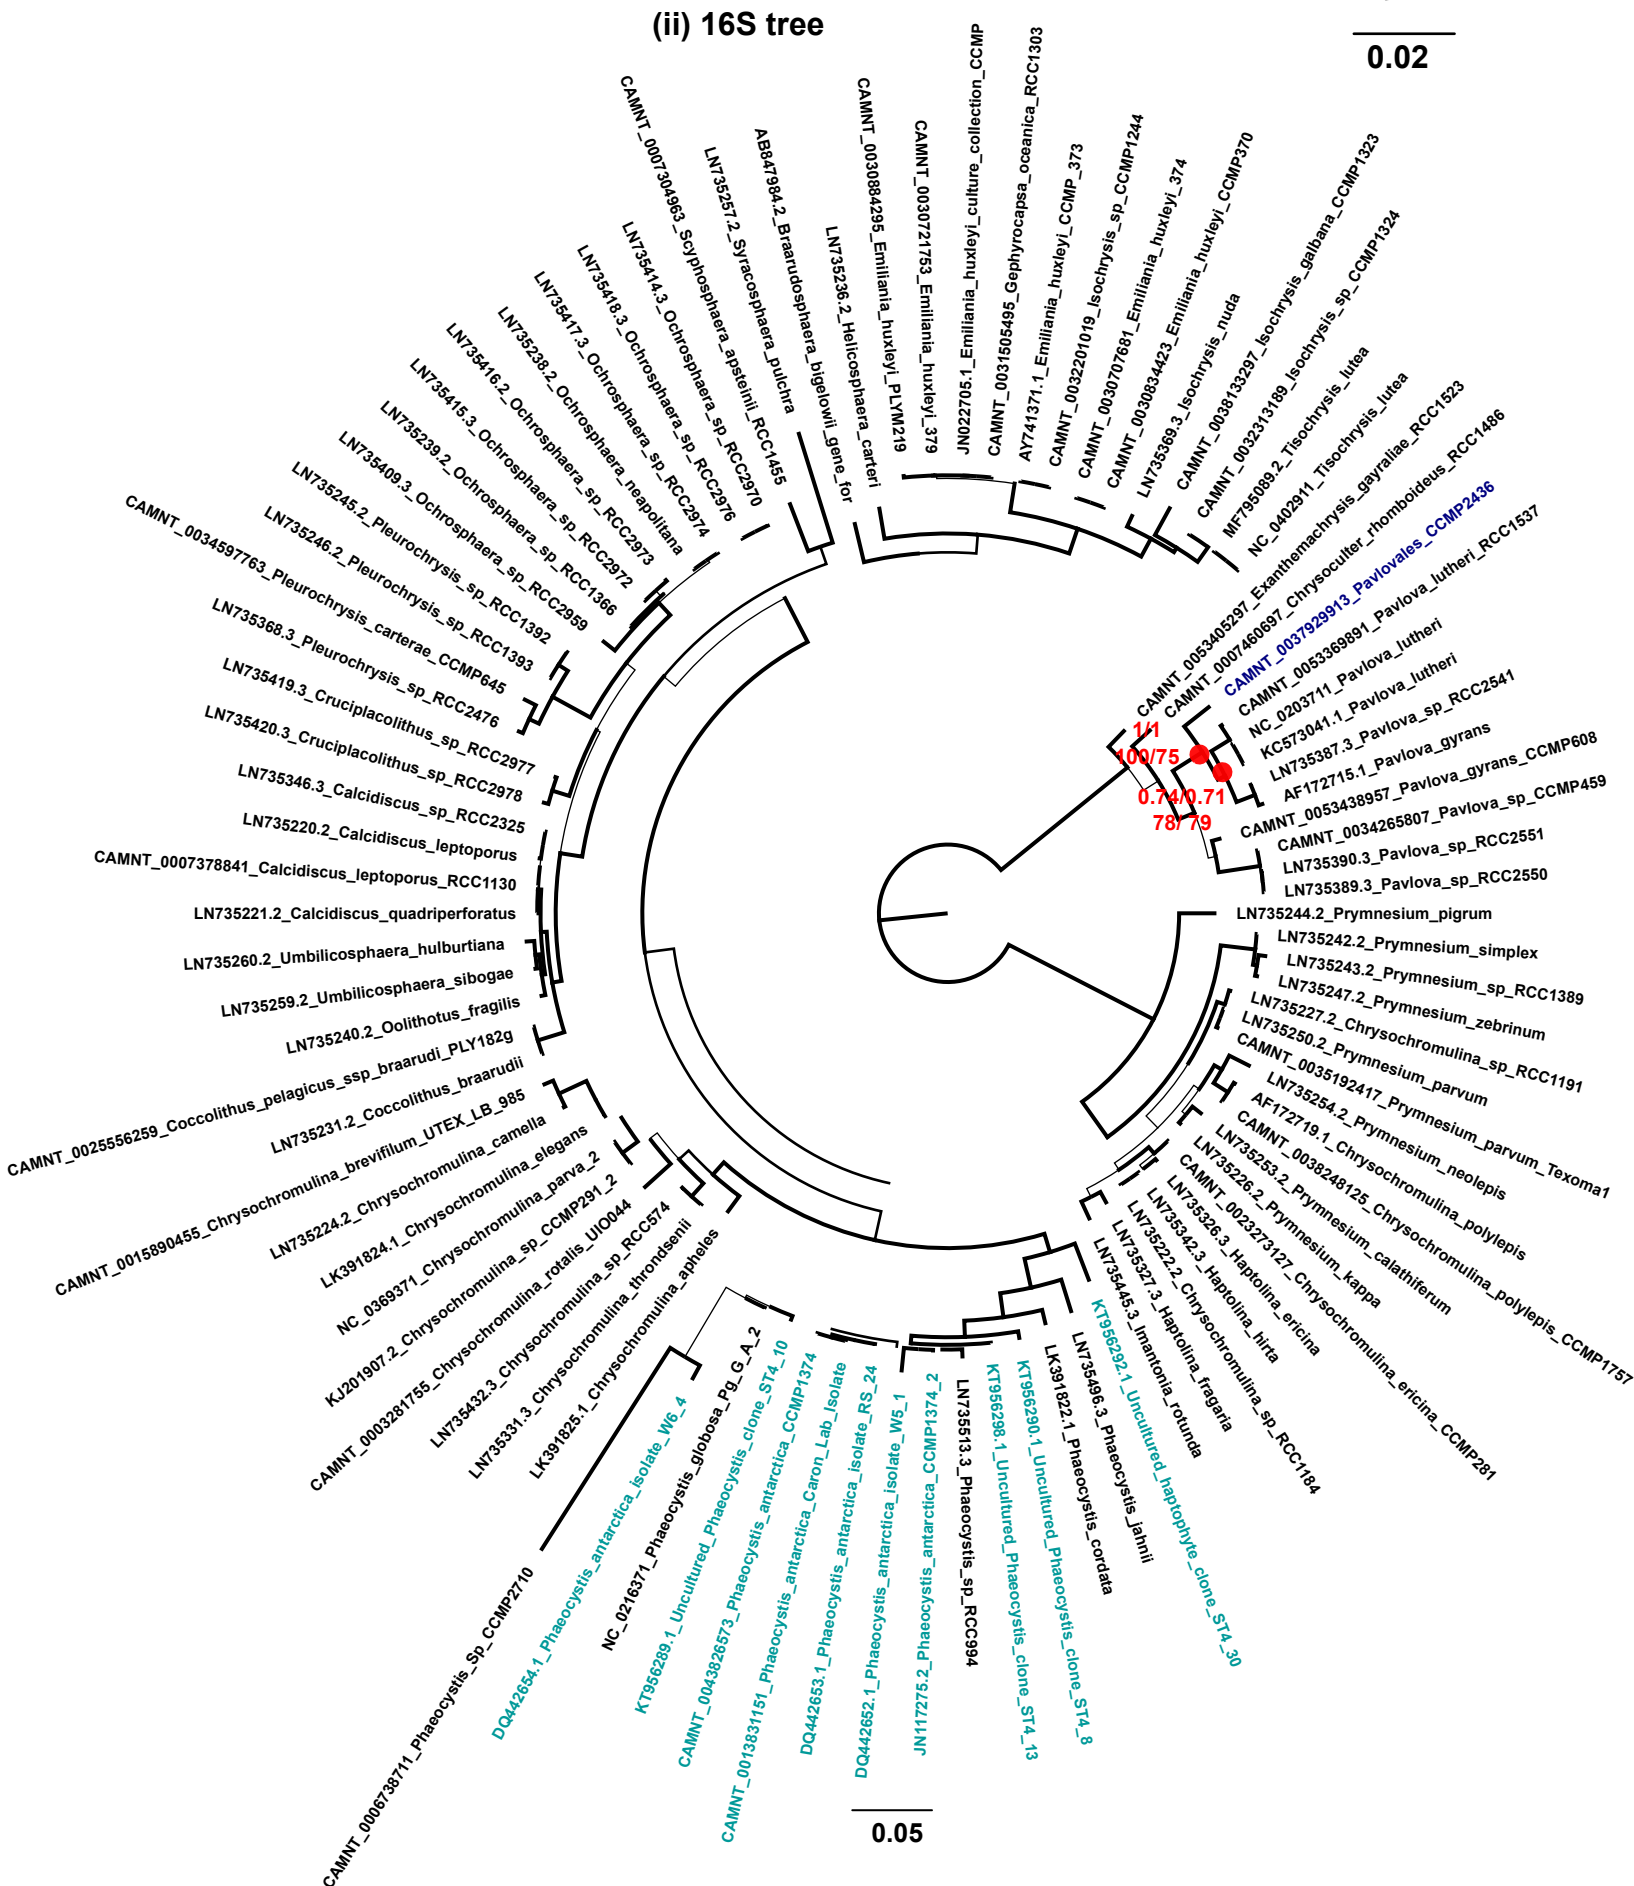

(i) 18S tree

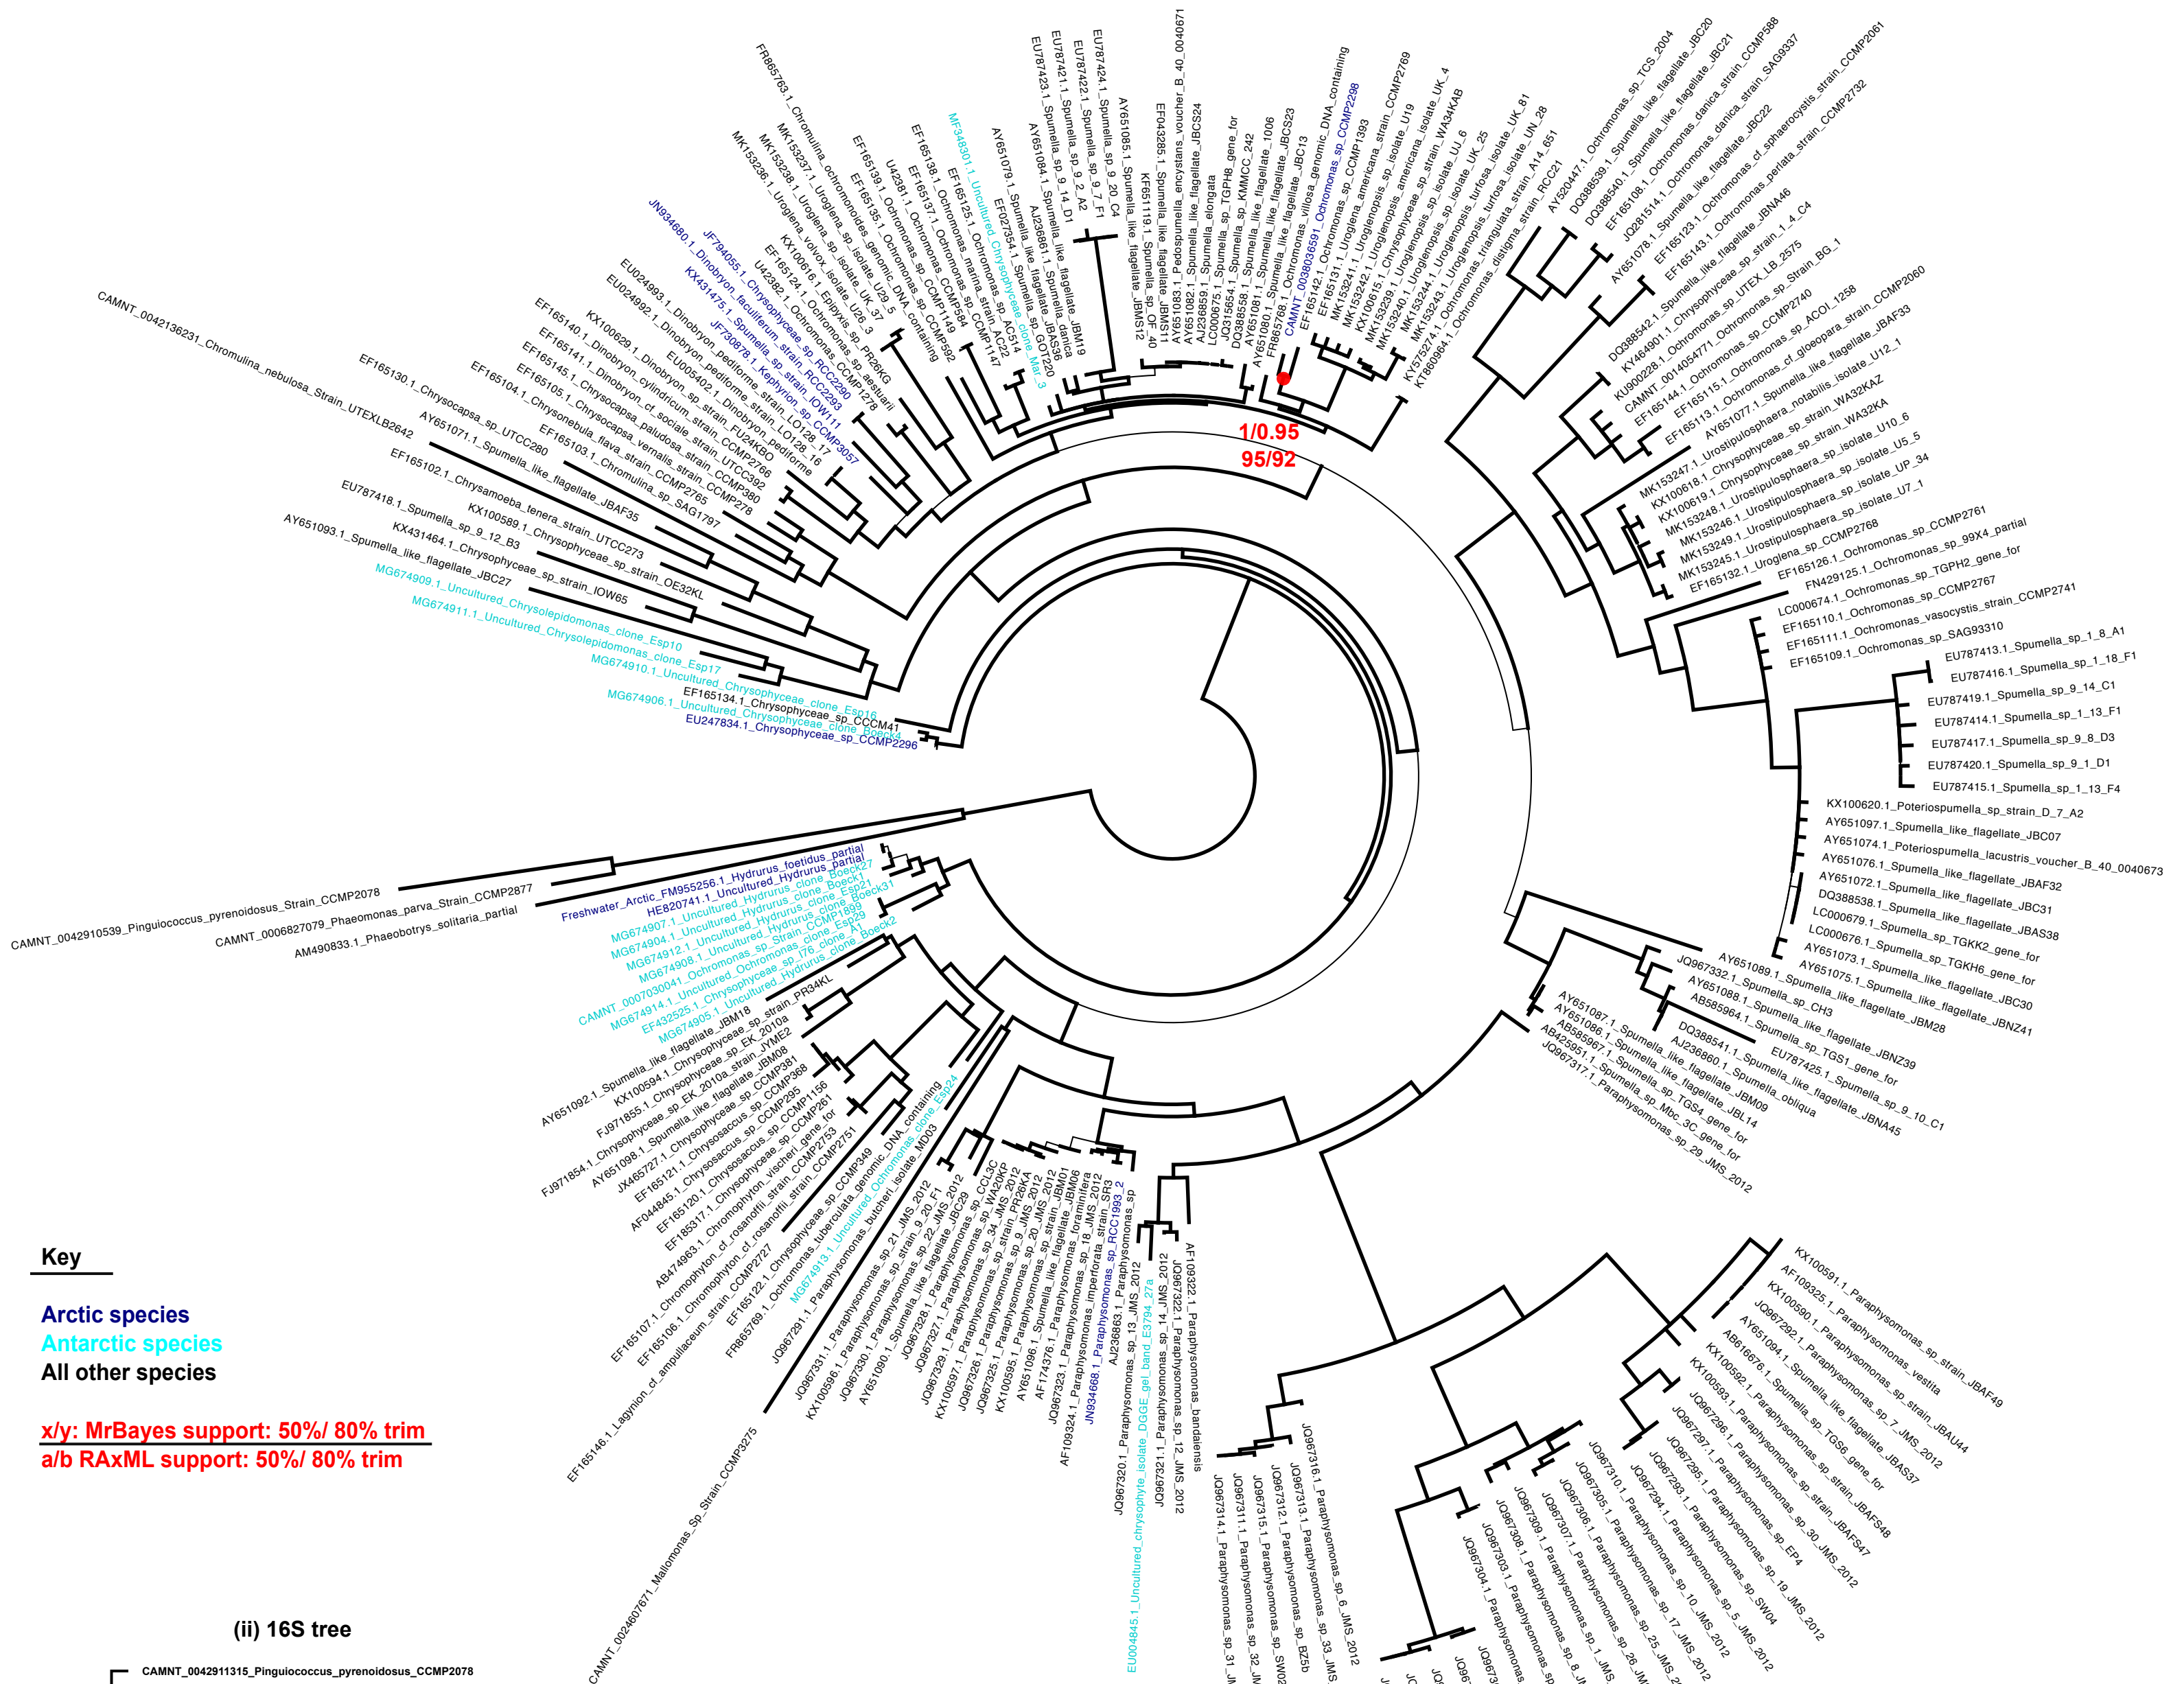

Key

- Arctic species
- Antarctic species
- All other species

x/y: MrBayes support: 50%/ 80% trim  
 a/b RAXML support: 50%/ 80% trim

(ii) 16S tree

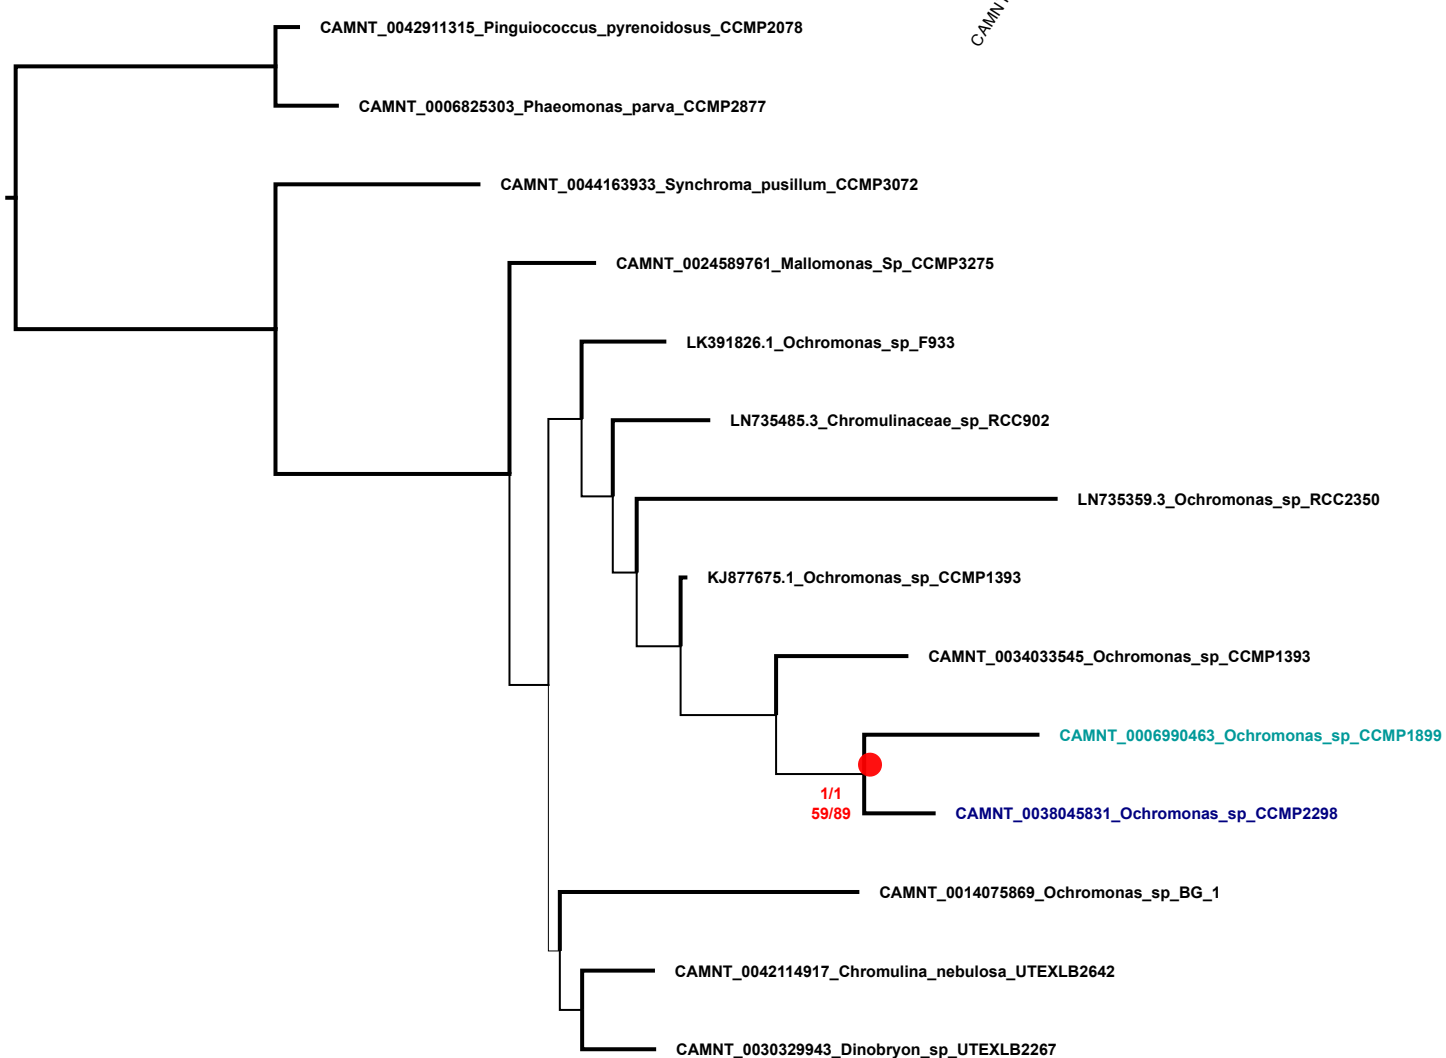

0.04

0.06

(i) Depth

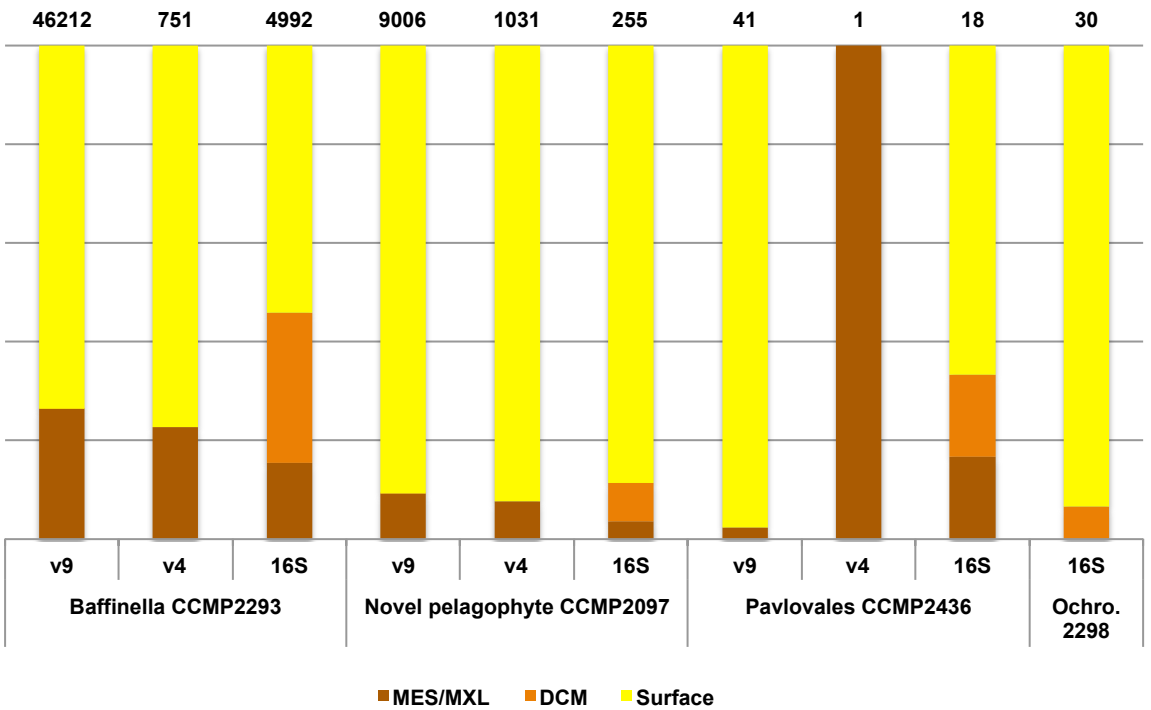

(ii) Size fraction

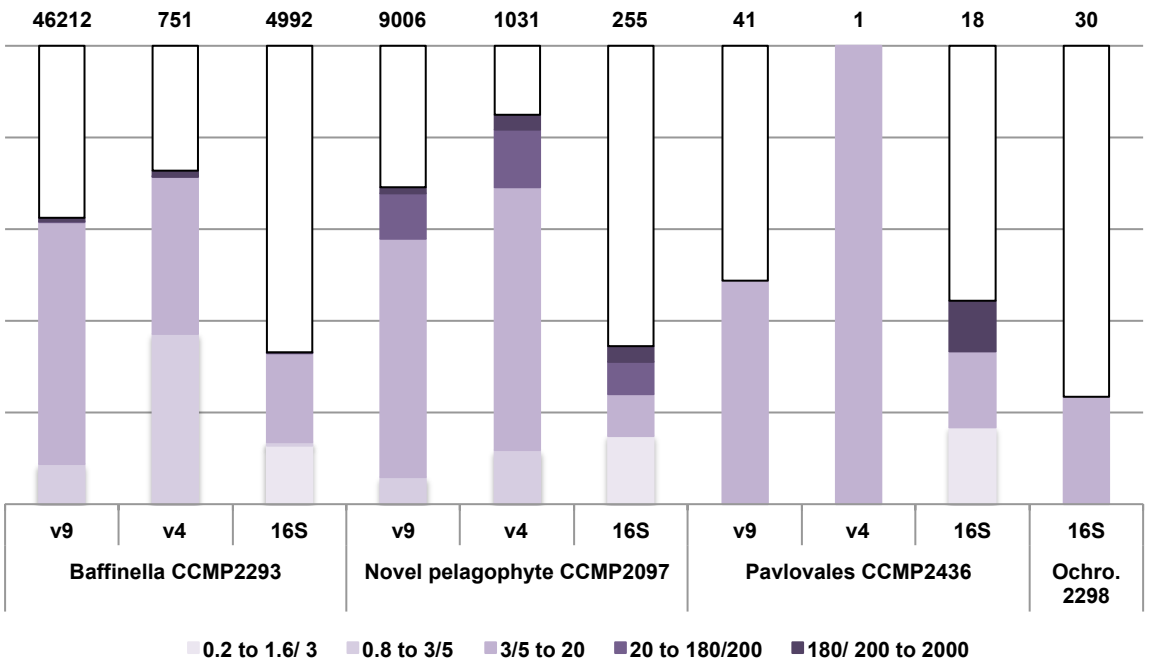

(i) *Baffinella* sp. CCMP2293

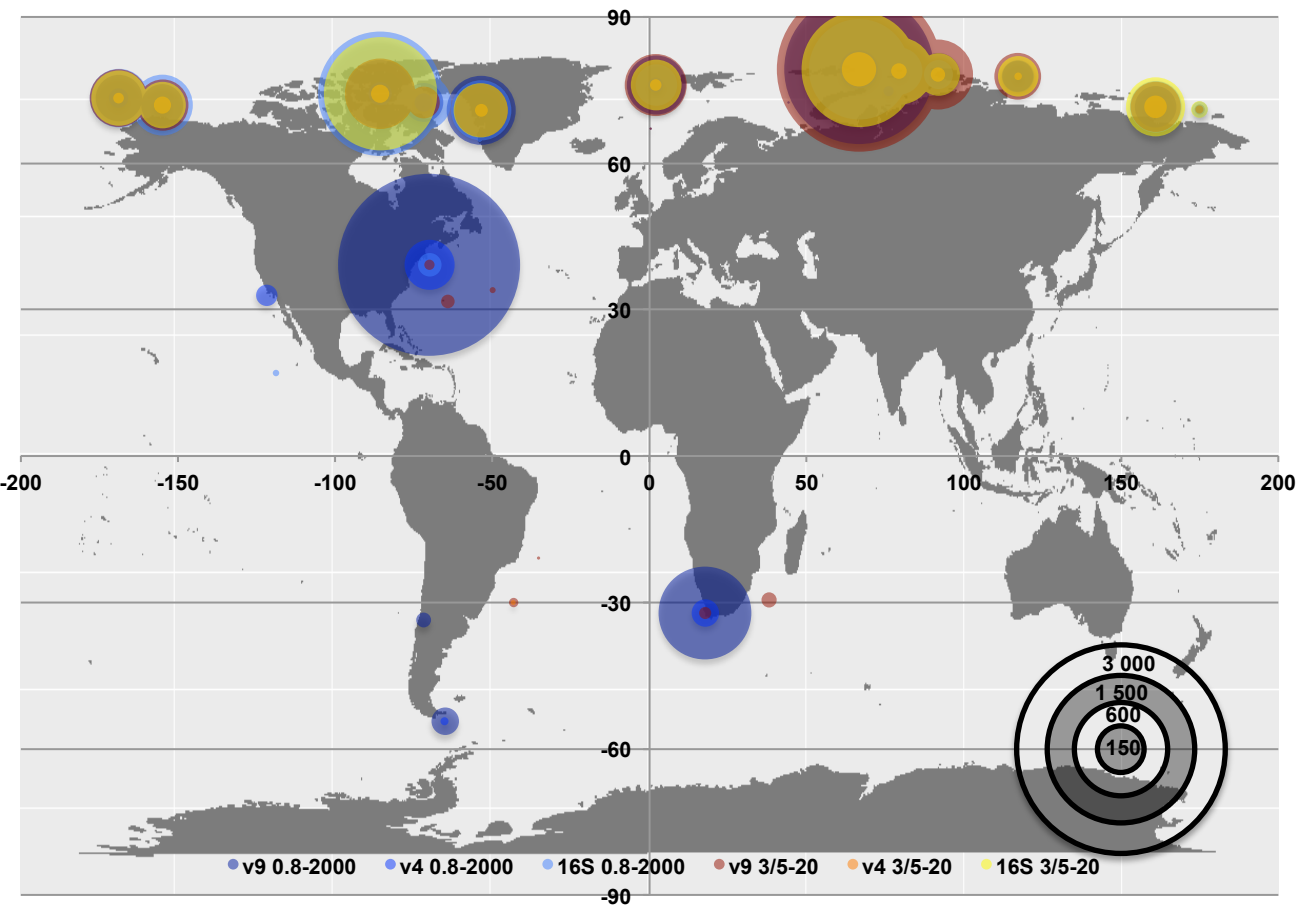

(ii) Novel pelagophyte CCMP2097

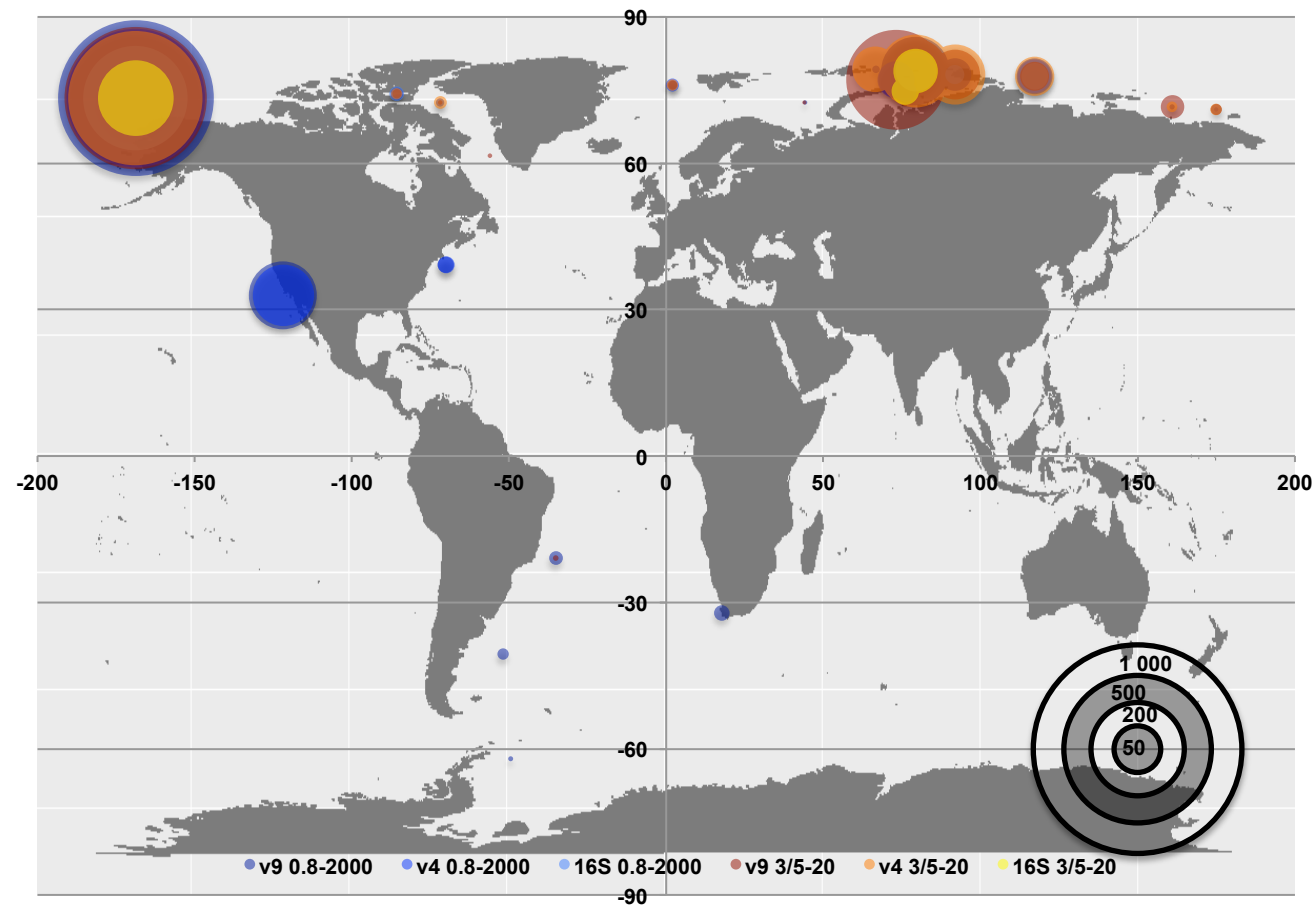

(iii) *Pavlova* sp. CCMP2436

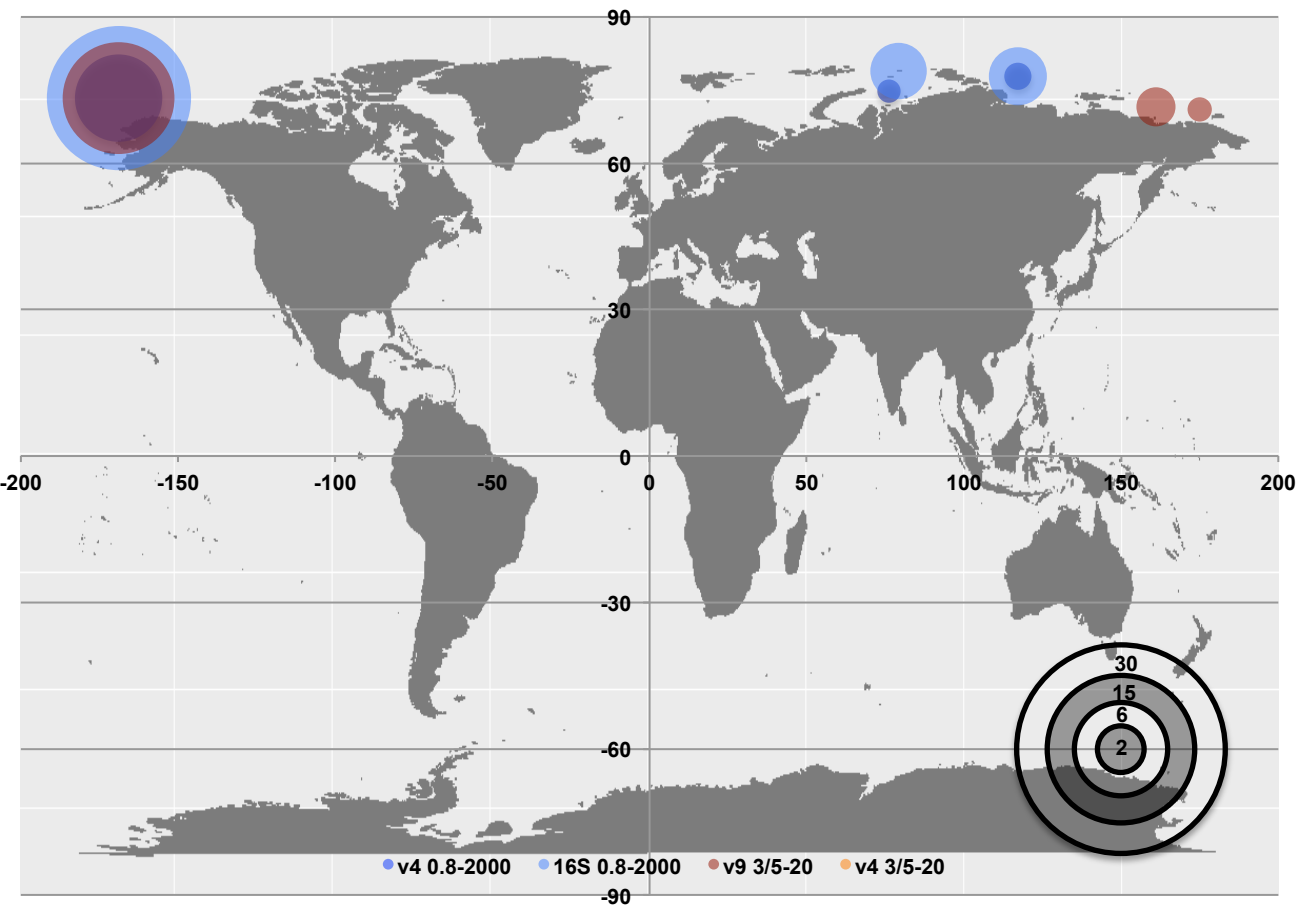

(iv) *Ochromonas* sp. CCMP2298

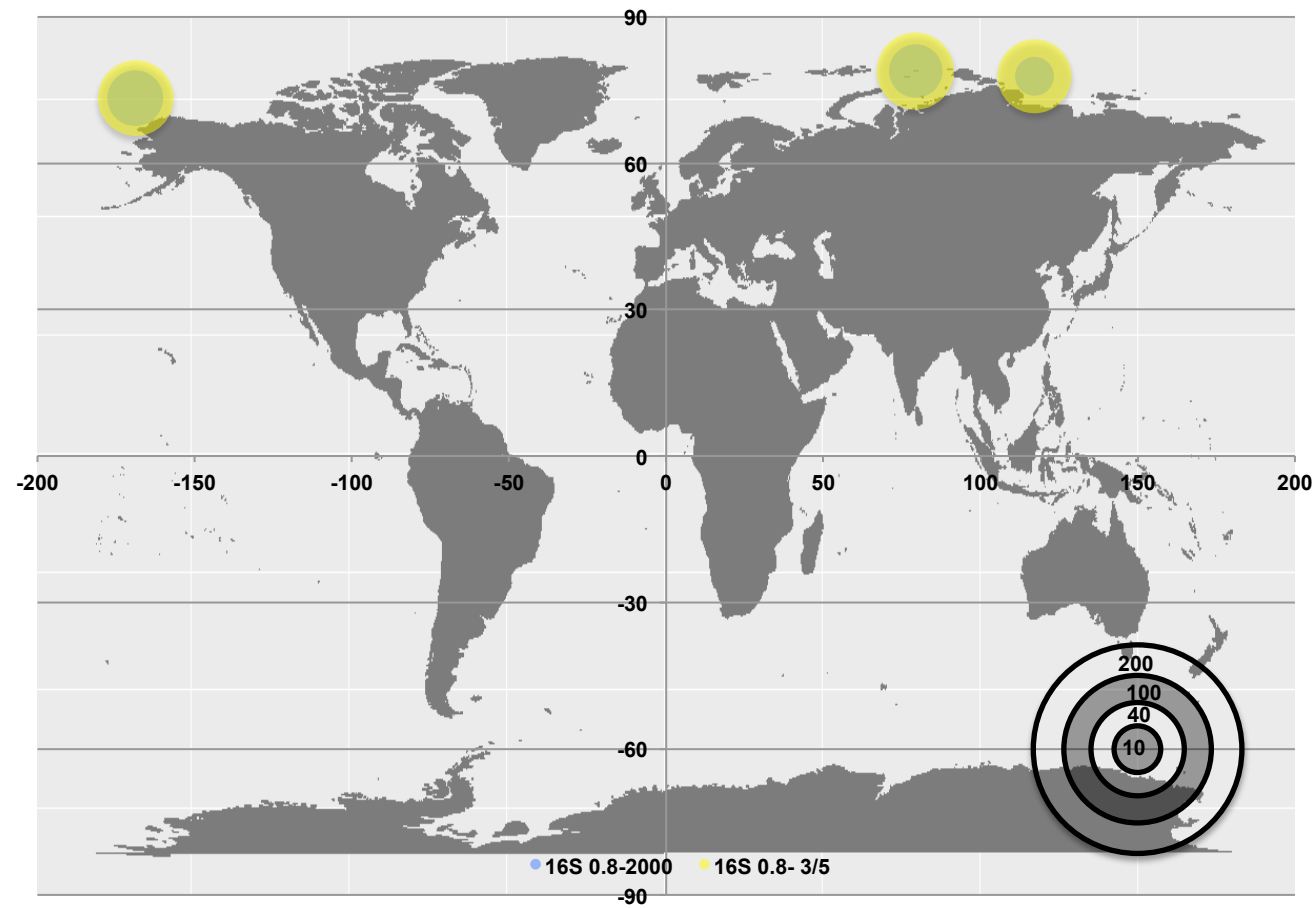

(i) 18S v4 ribotypes

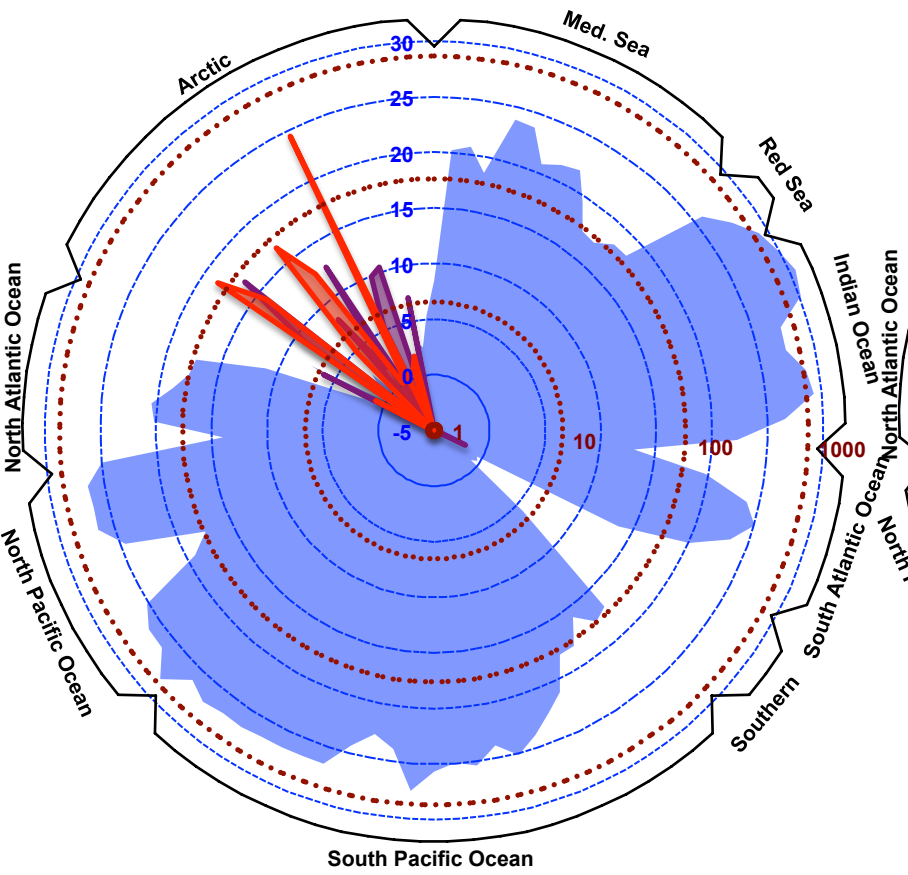

(ii) 18S v9 ribotypes

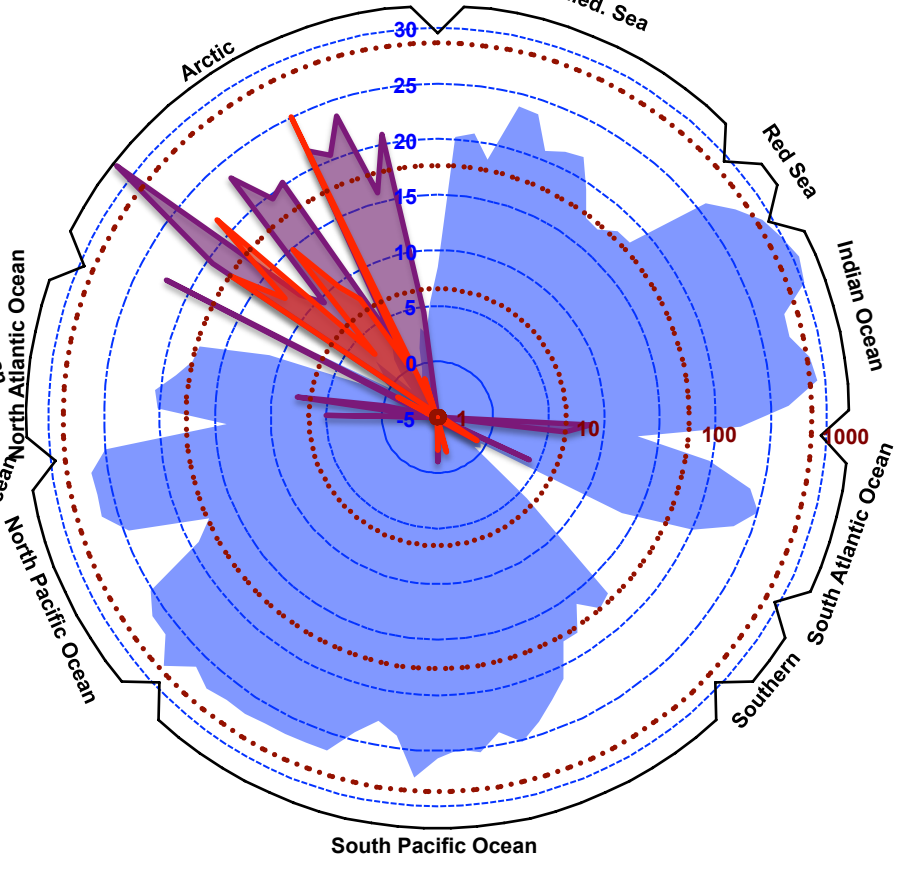

(iii) 16S v4v5 ribotypes

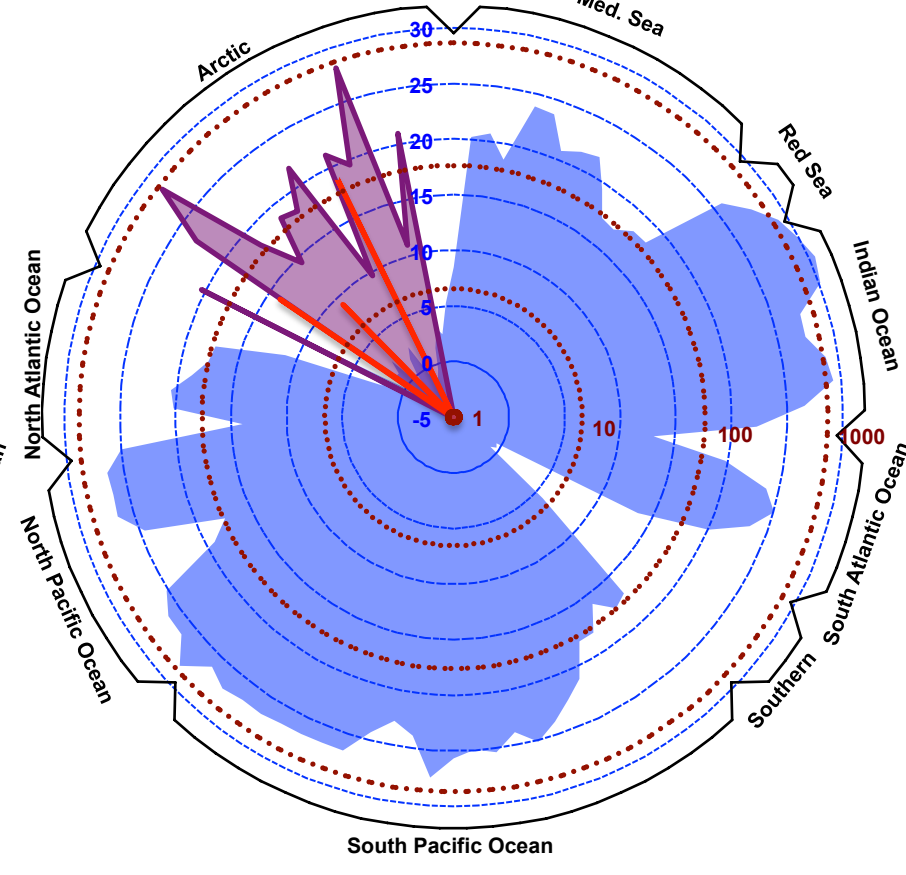

(iv) 18S v9 ribotypes

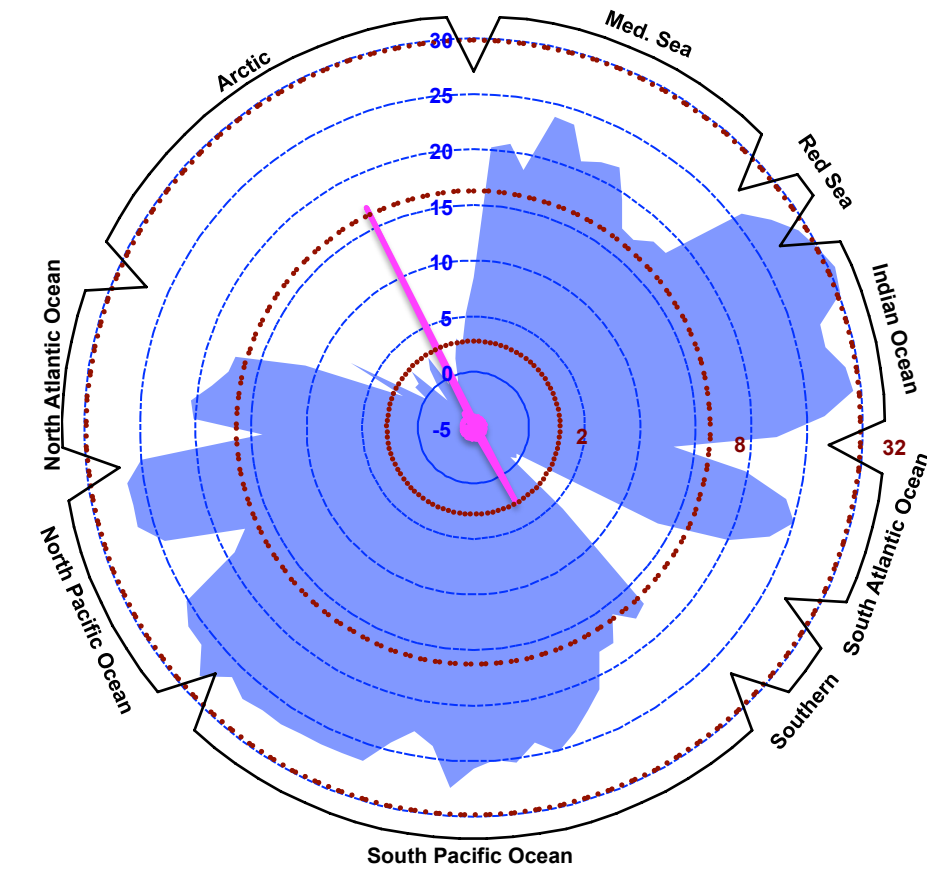

(v) 16S v4v5 ribotypes

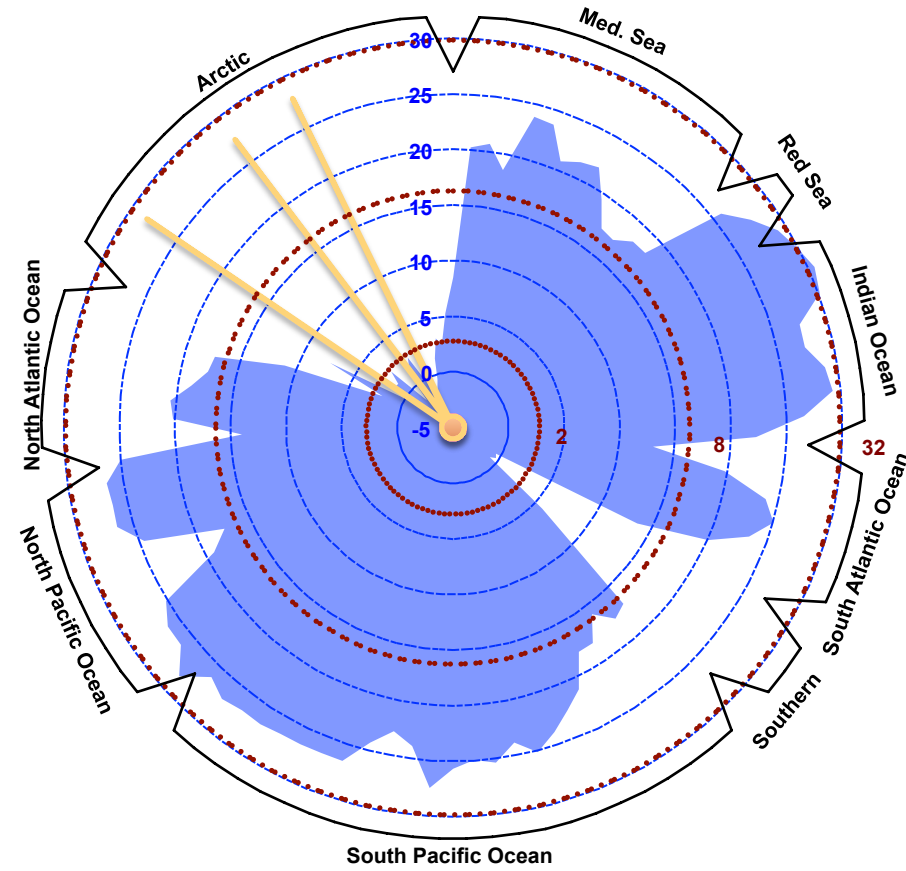

**Key**

- Baffinella sp. CCMP2293**
- Novel pelagophyte CCMP2097**
- Pavlova sp. CCMP2436**
- Ochromonas sp. CCMP2298**
- Temperature (°C)**
- Relative ribotype abundance (ppm)**
- Oceanic province**

### (i) Genomes phylPCA

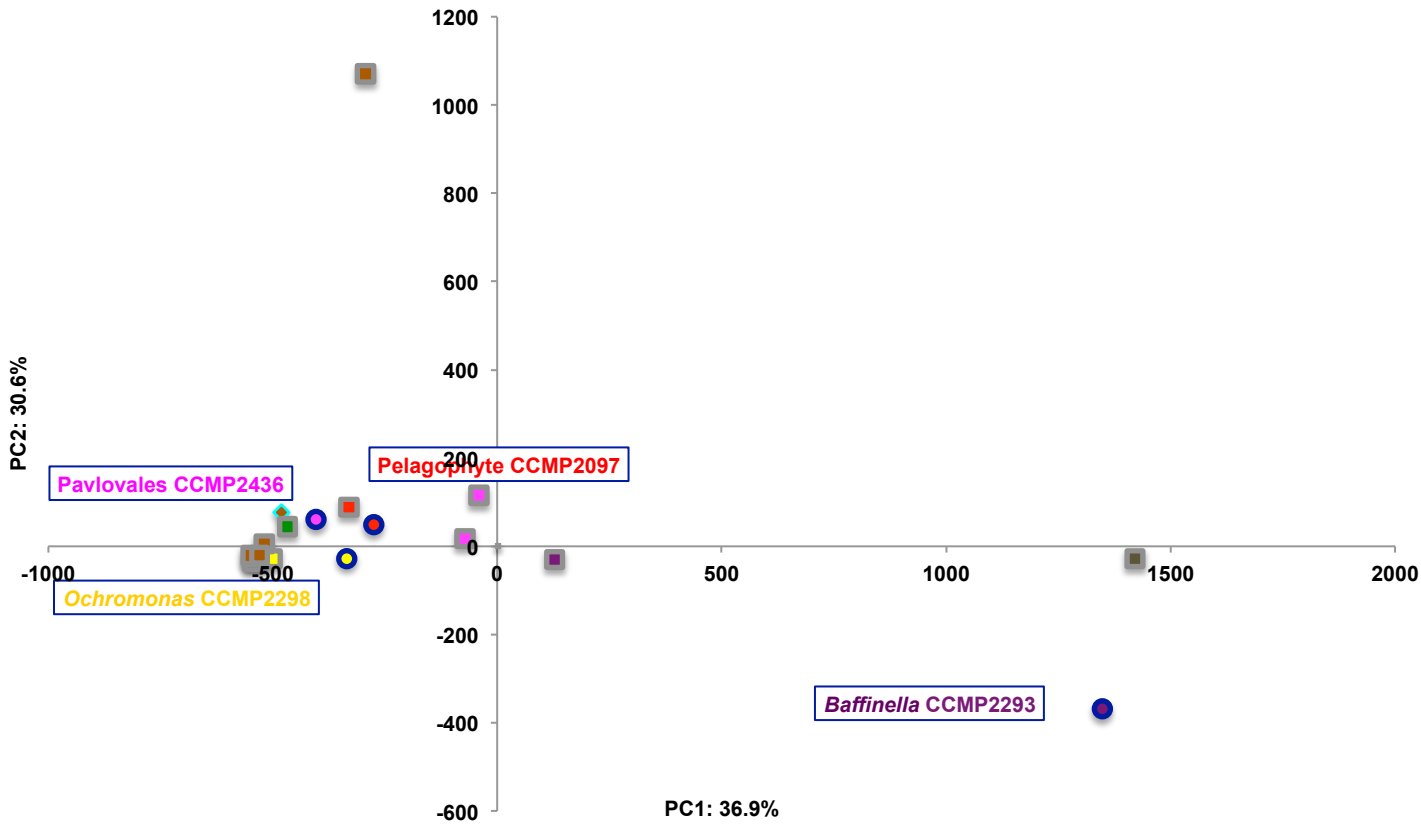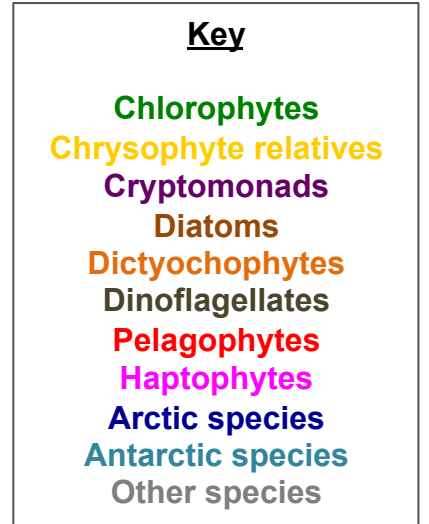

### (ii) Transcriptomes phylPCA

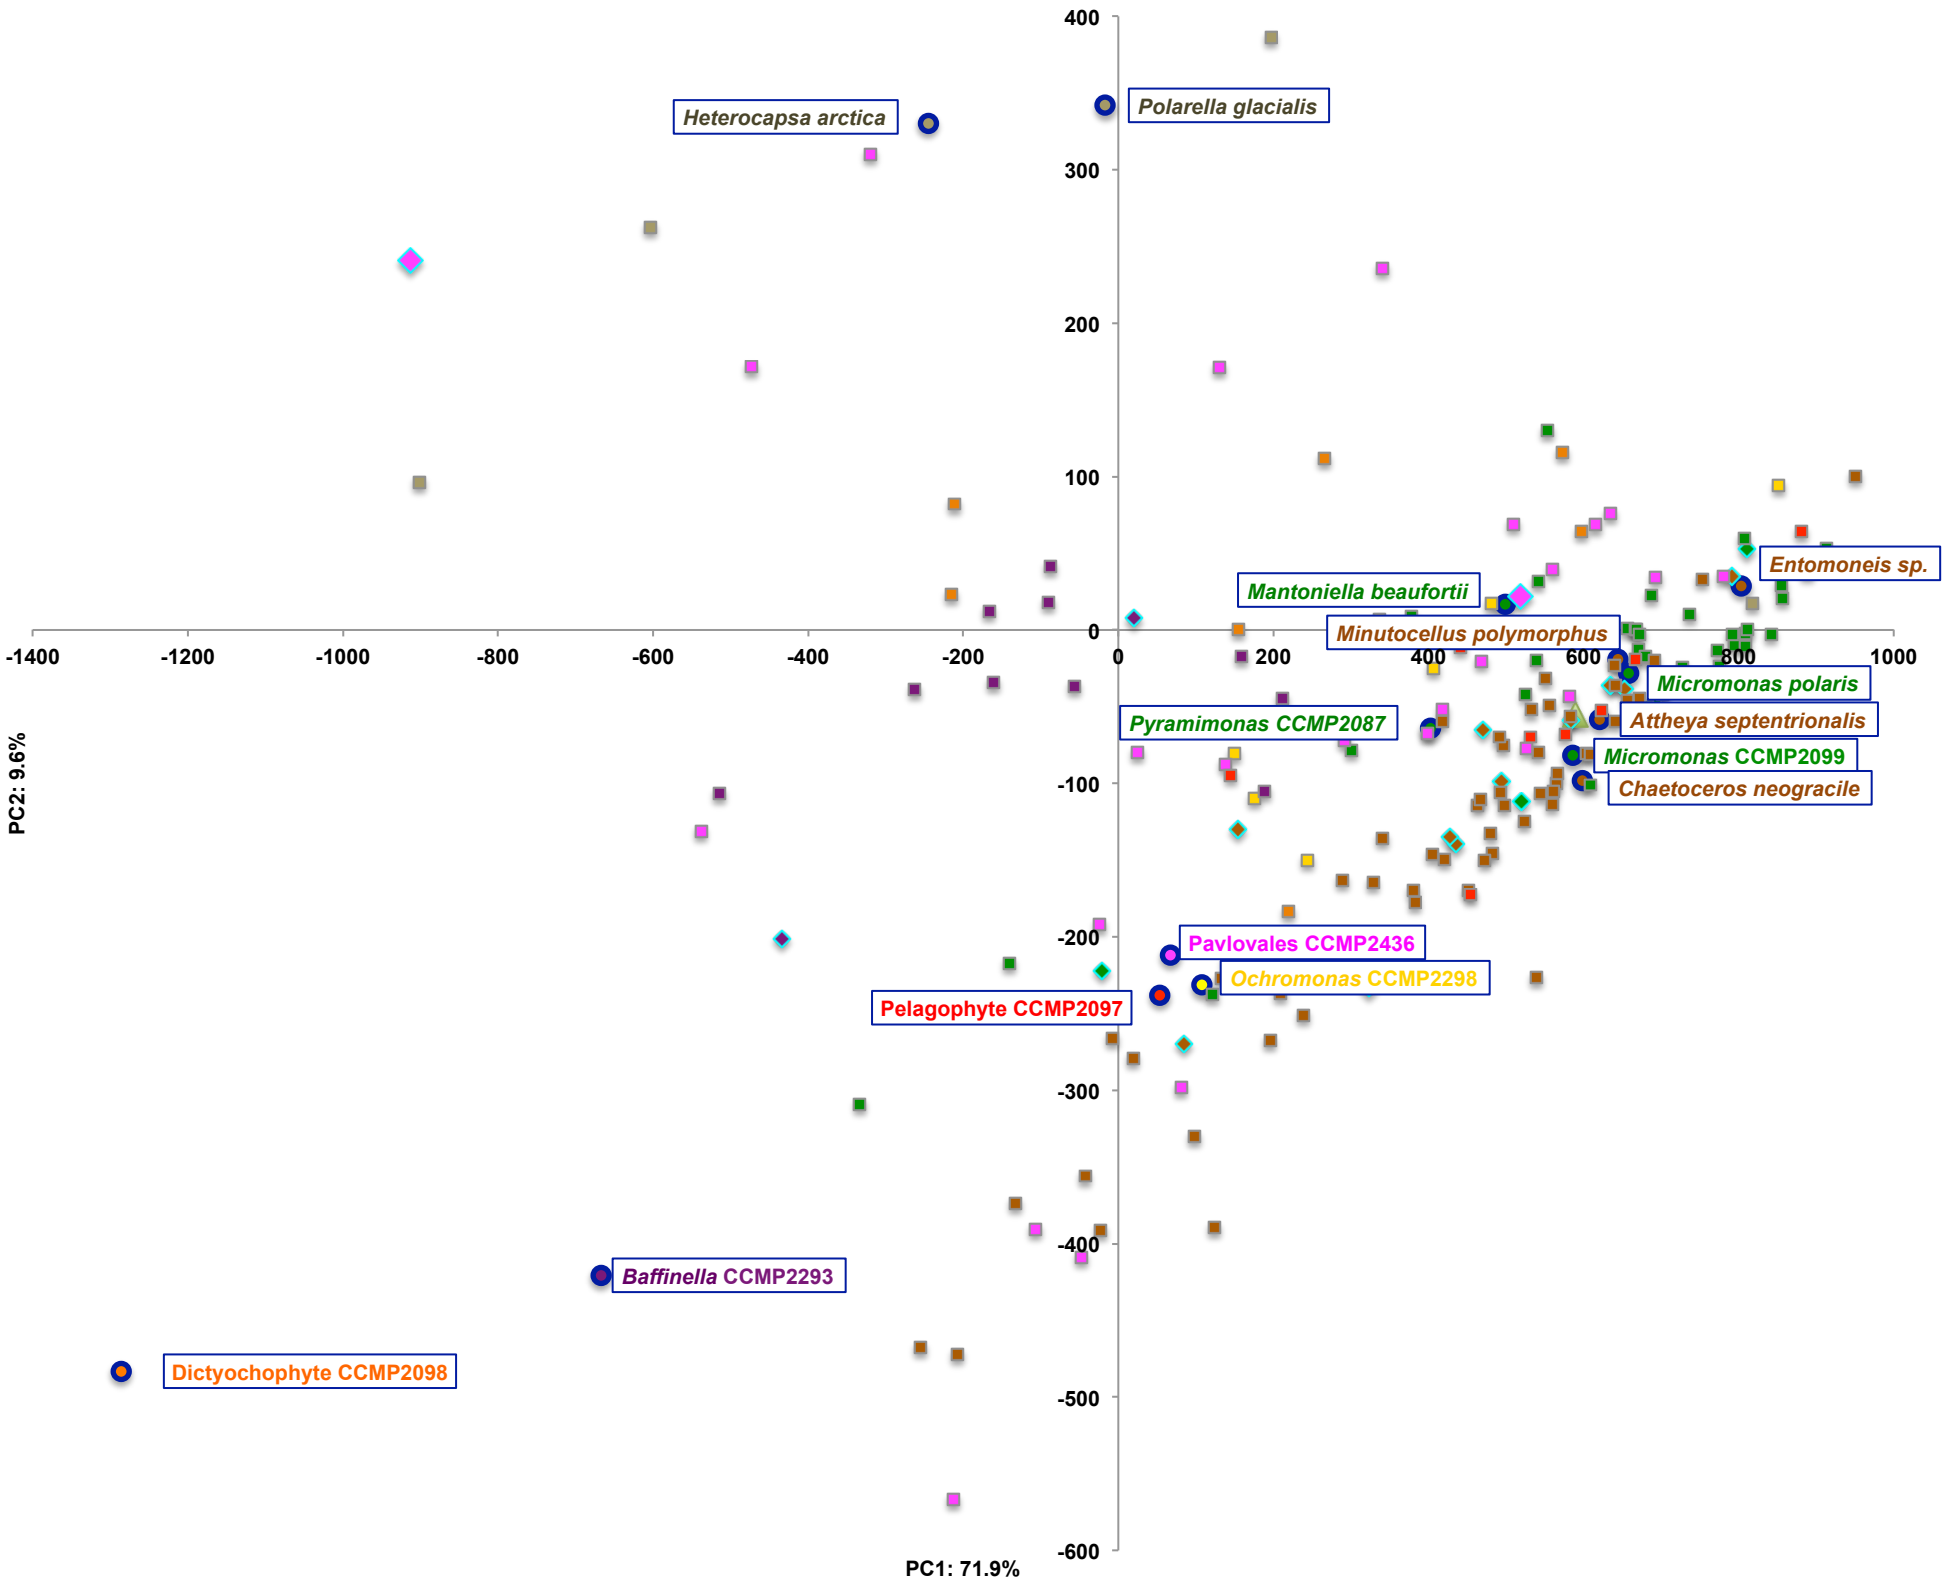



A

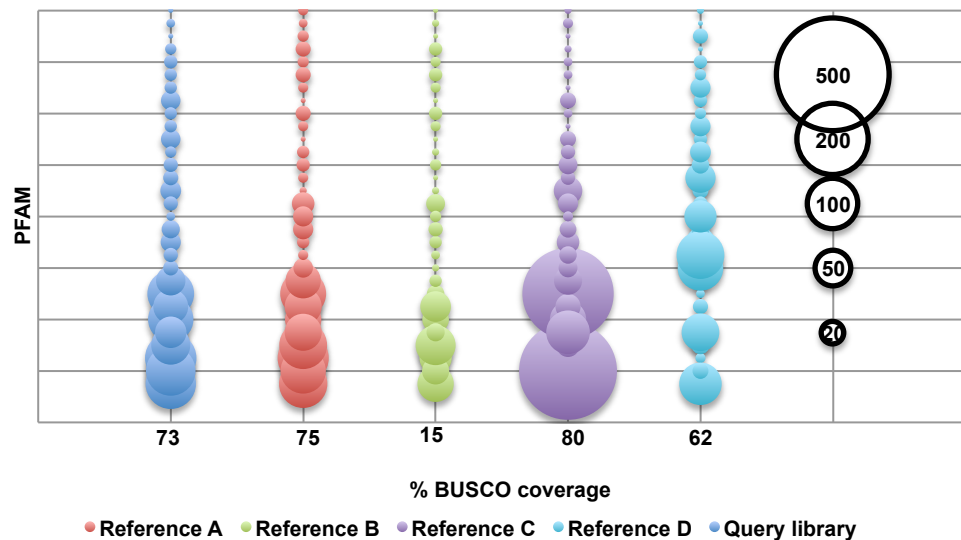

C

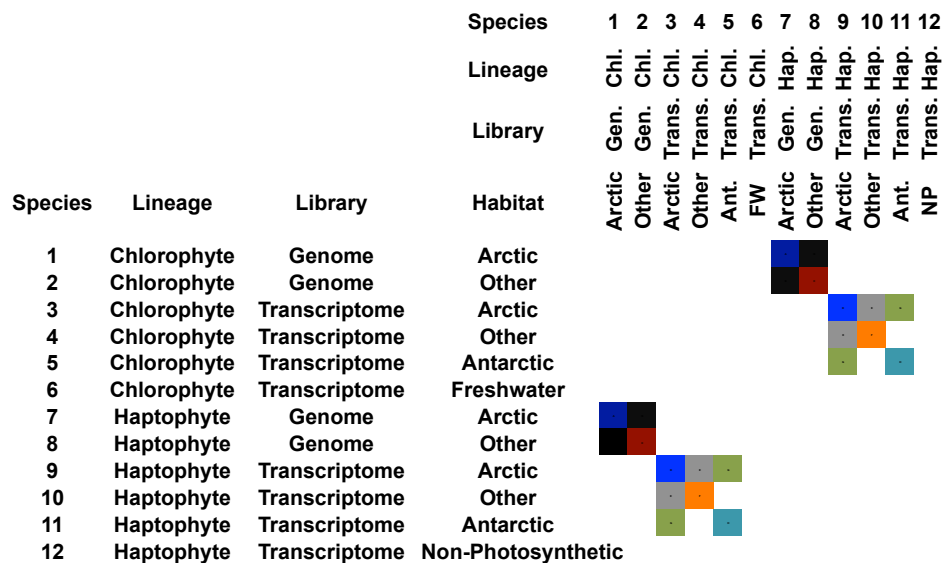

B

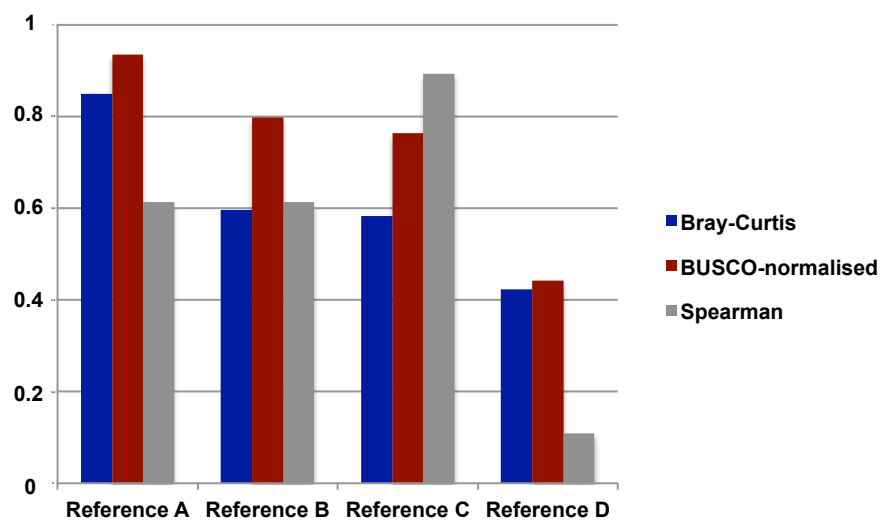

D

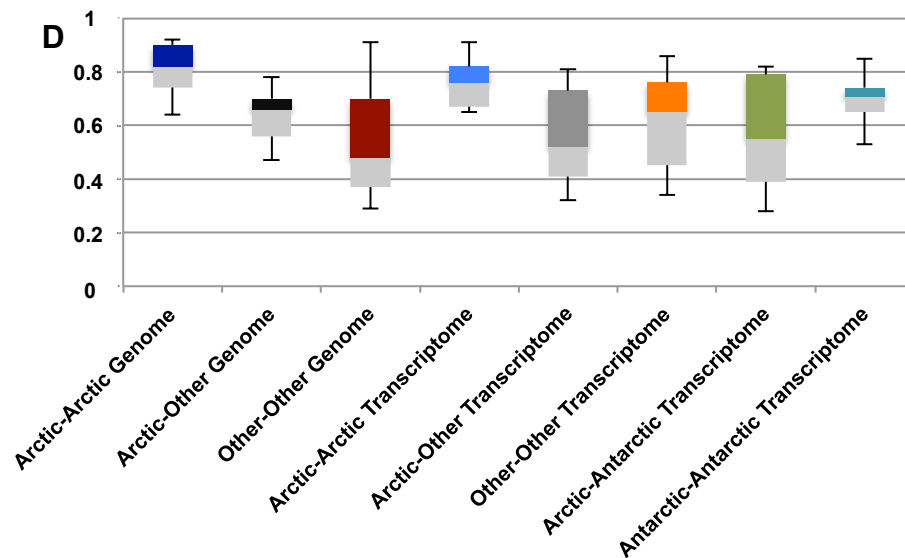

**A** BUSCO-adjusted shared PFAMs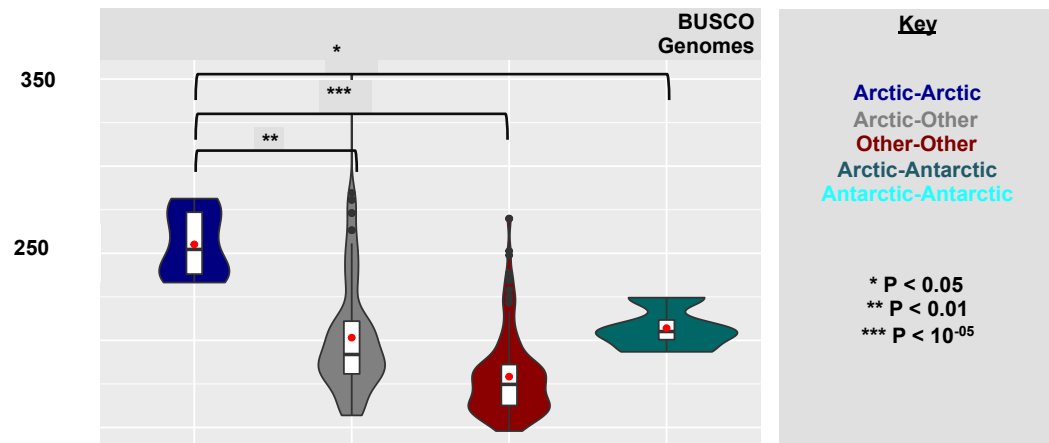**B** PFAM Spearman Rank Index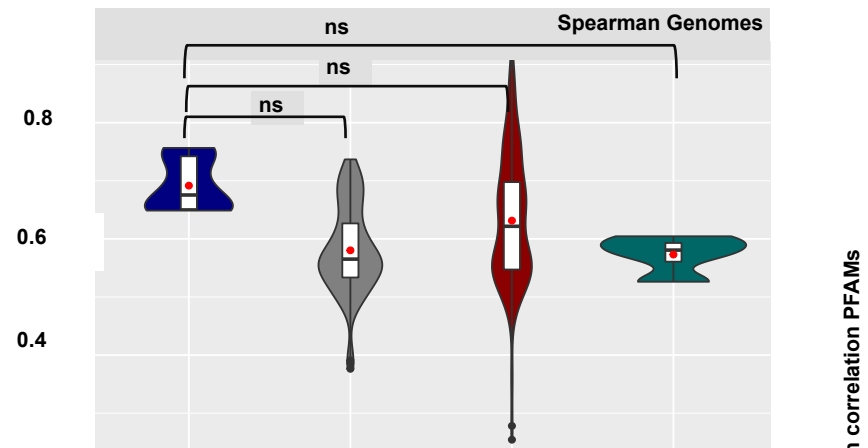

BUSCO-adjusted shared PFAMs

Spearman correlation PFAMs

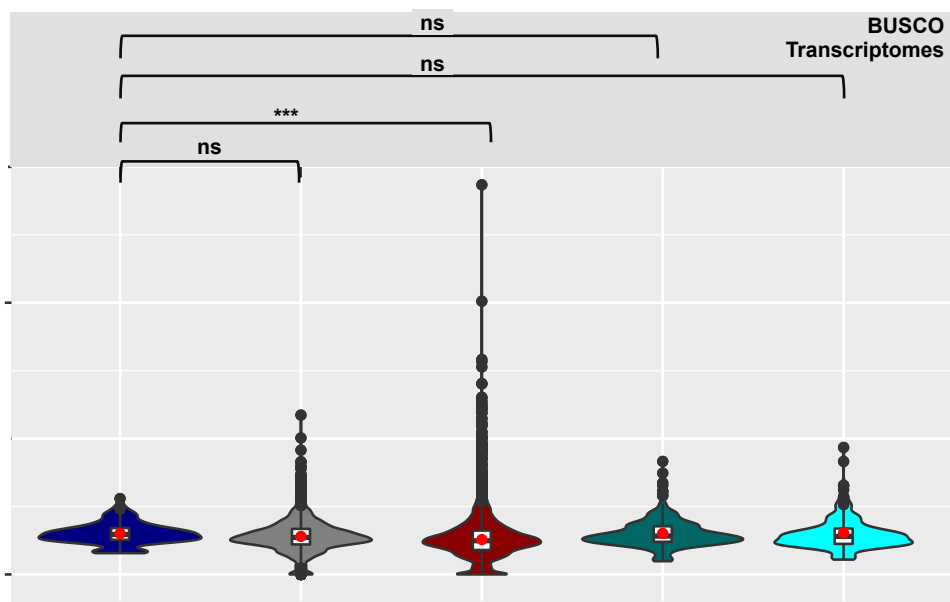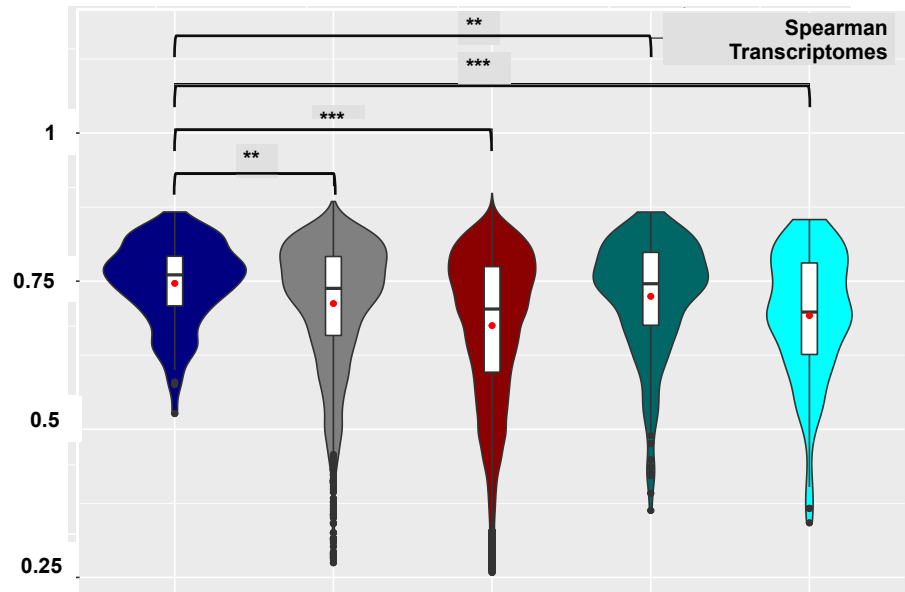

i) PFAM convergence; Arctic genomes

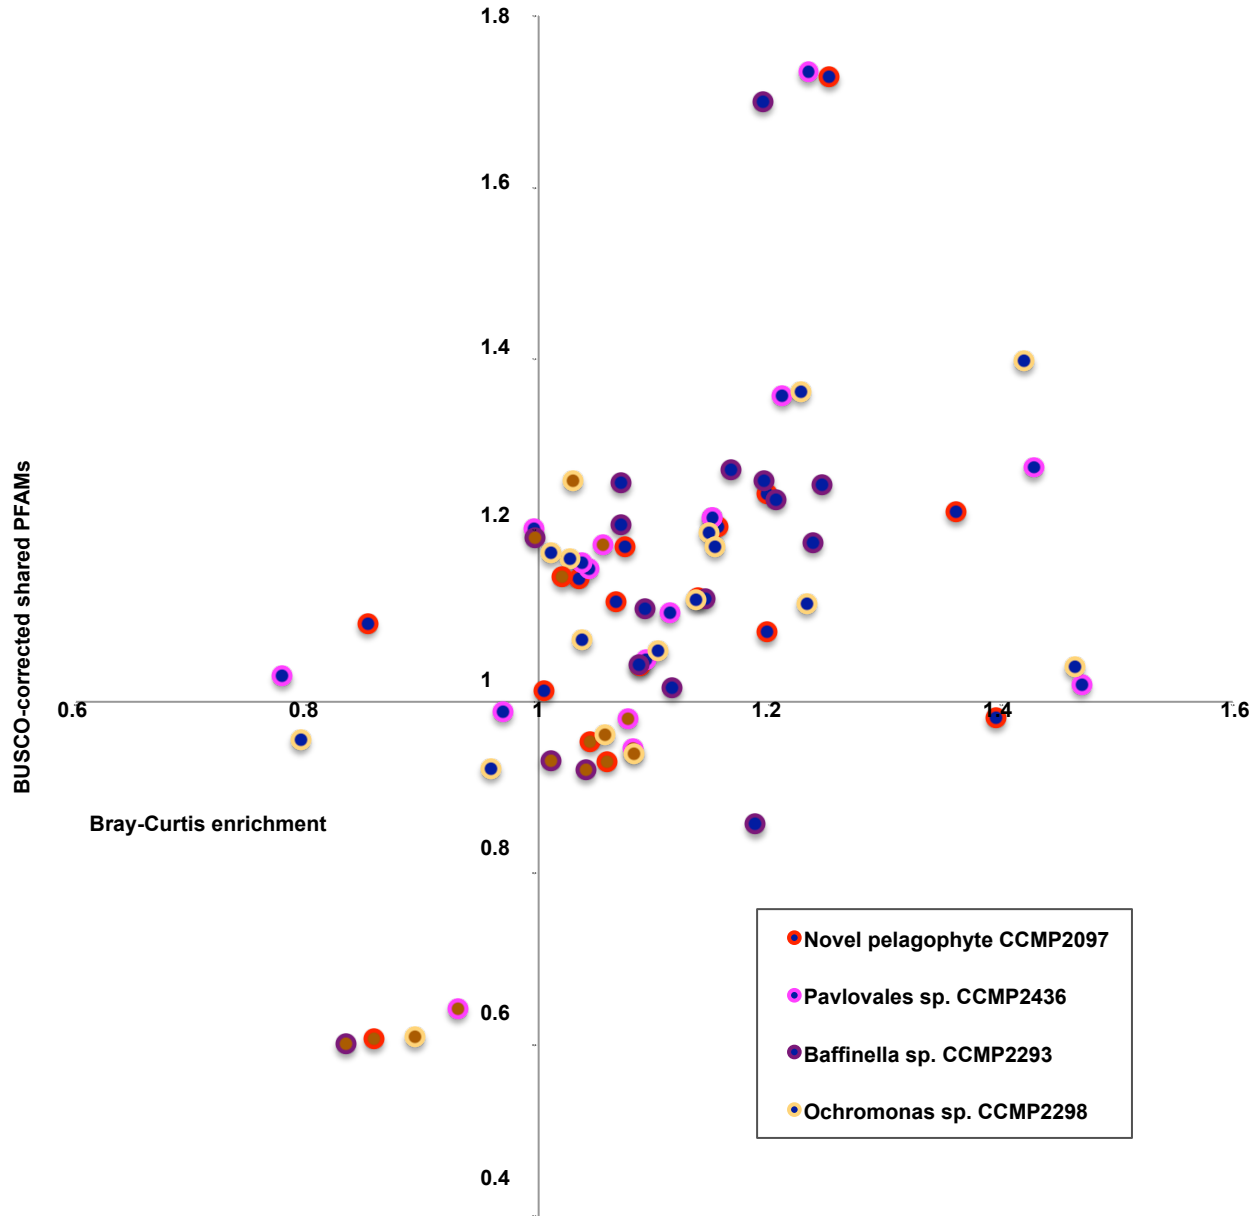

ii) PFAM convergence; Arctic transcriptomes

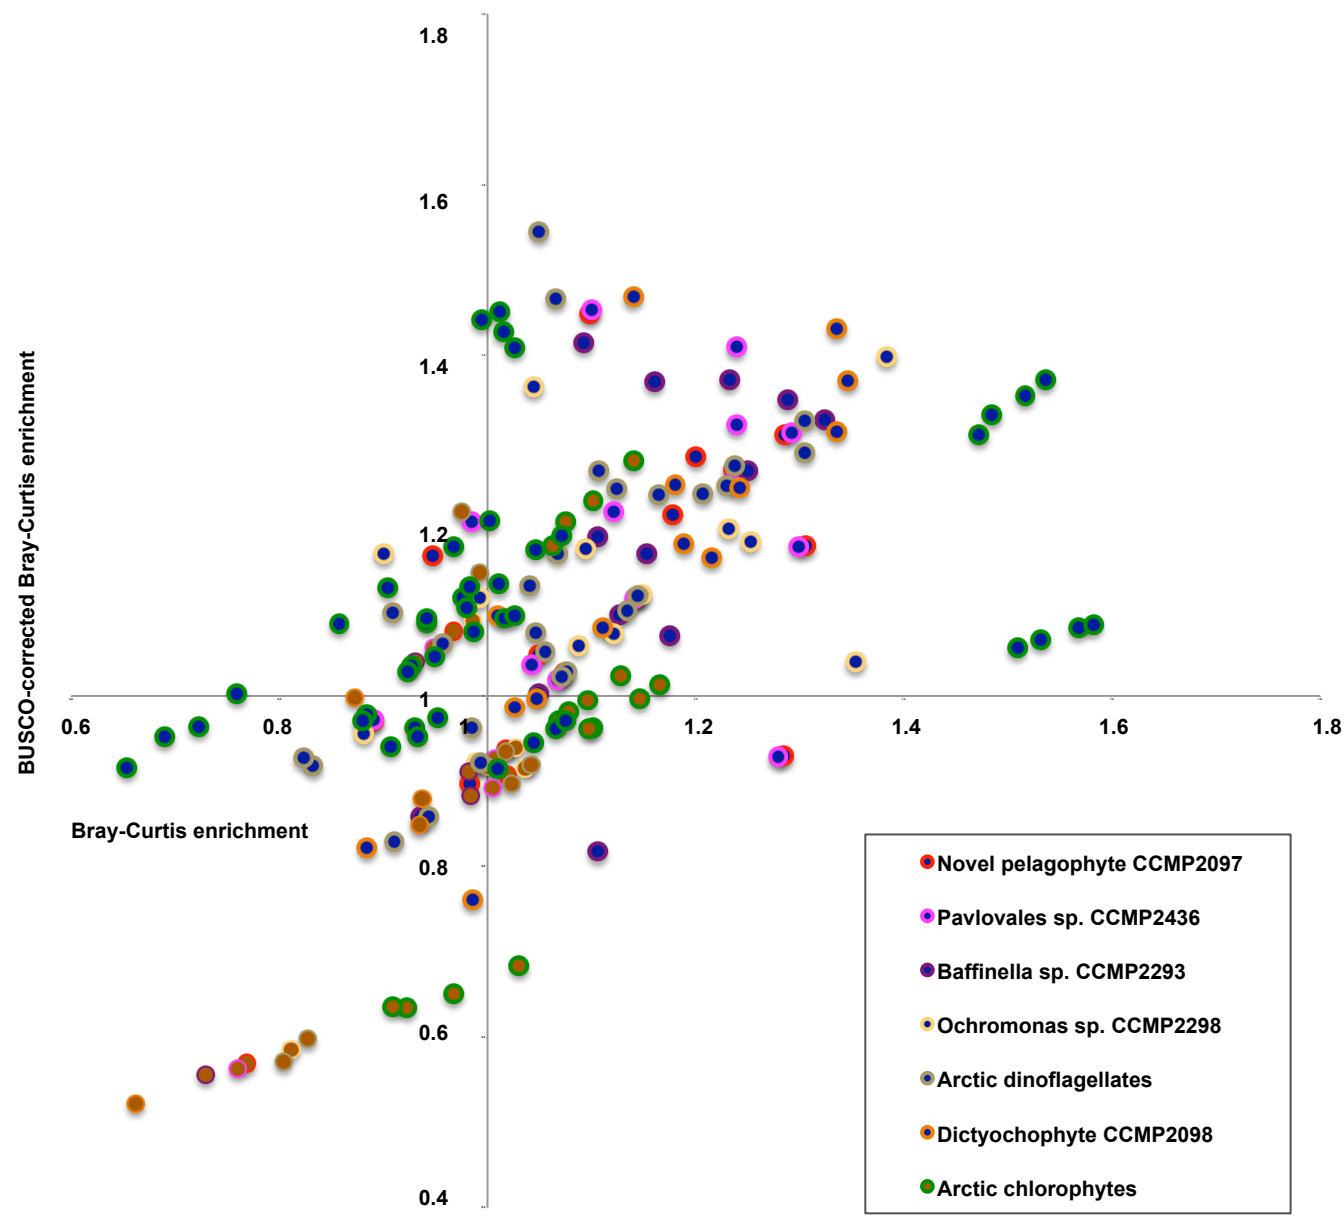

Convergences involving diatoms

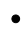

All other Arctic convergences

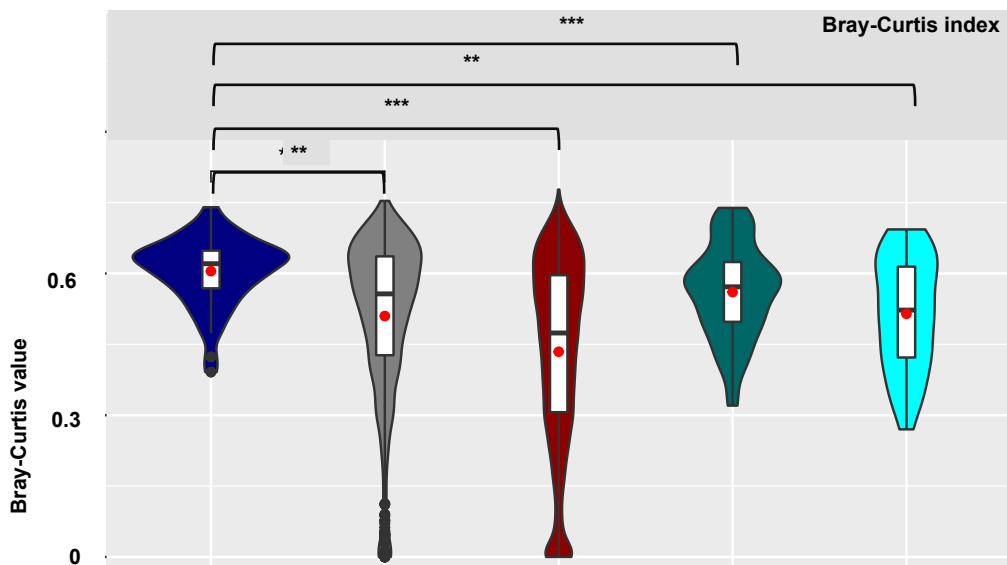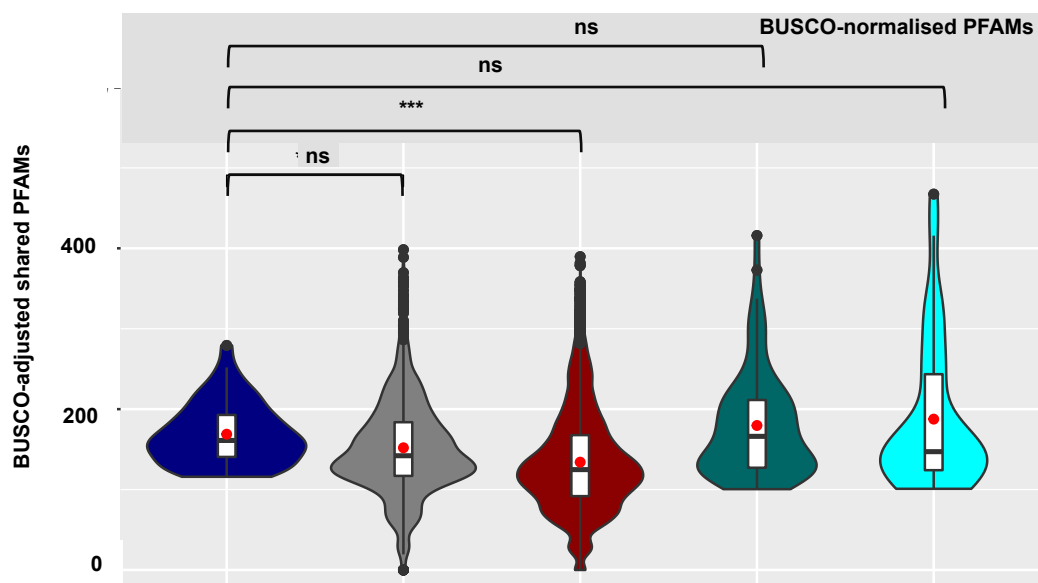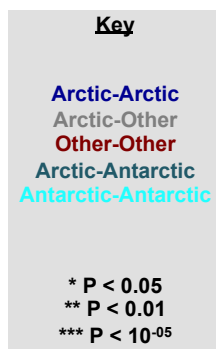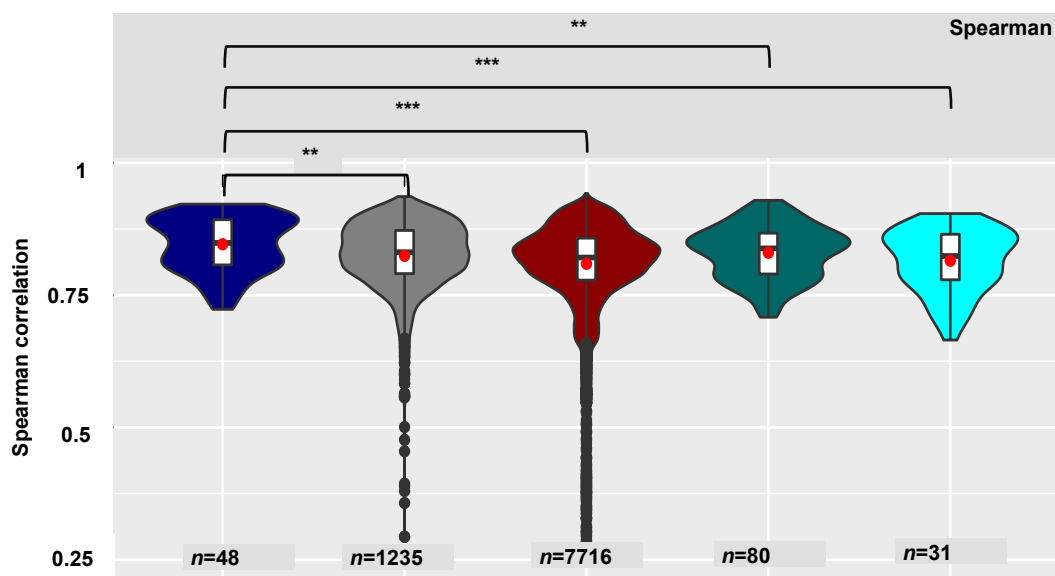

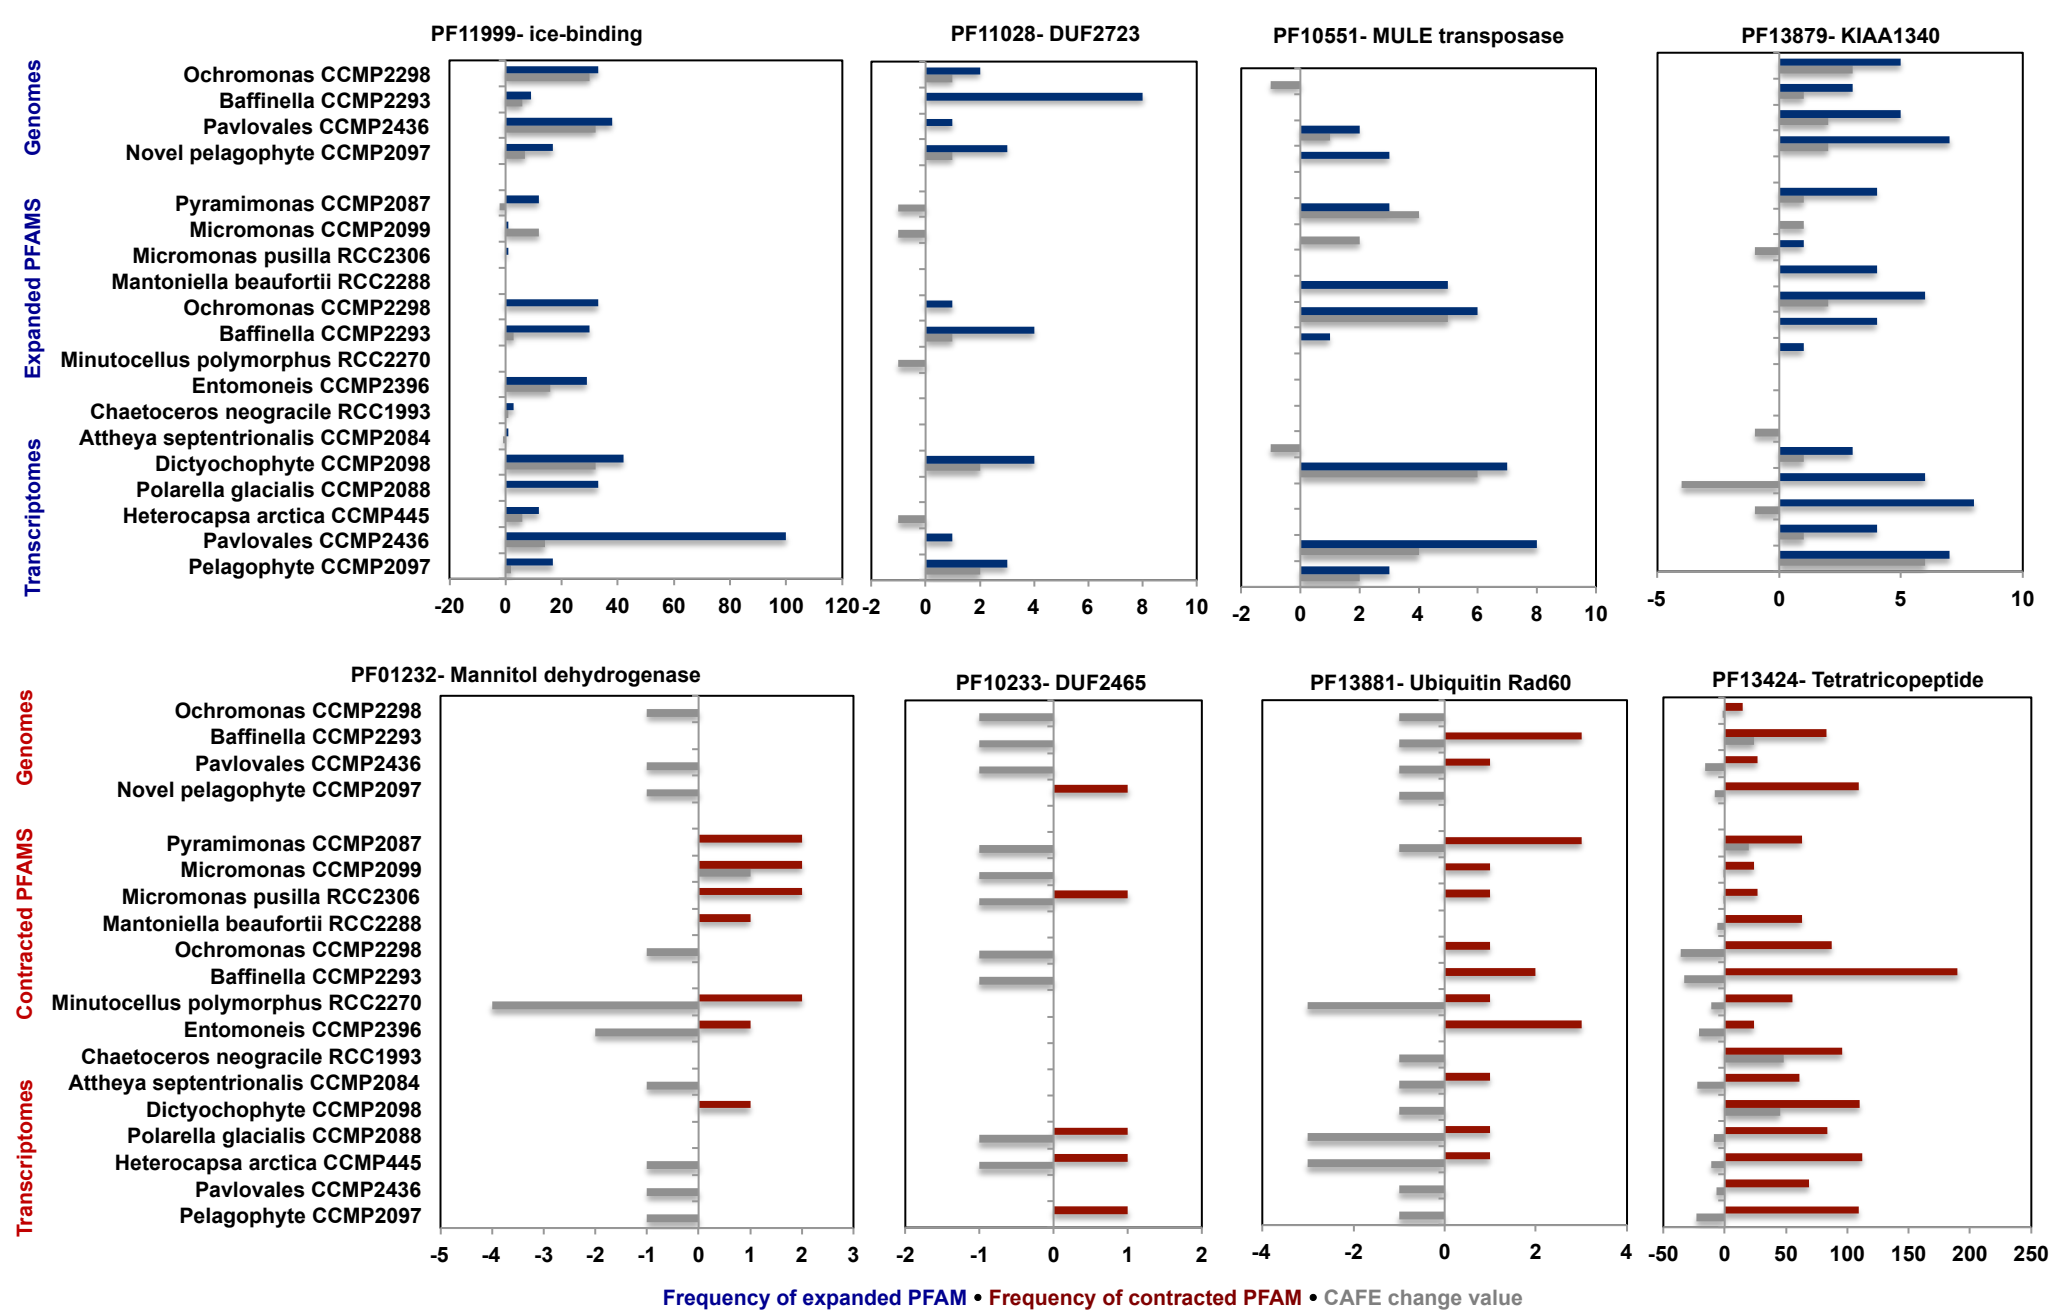

(i) Total metaT abundance

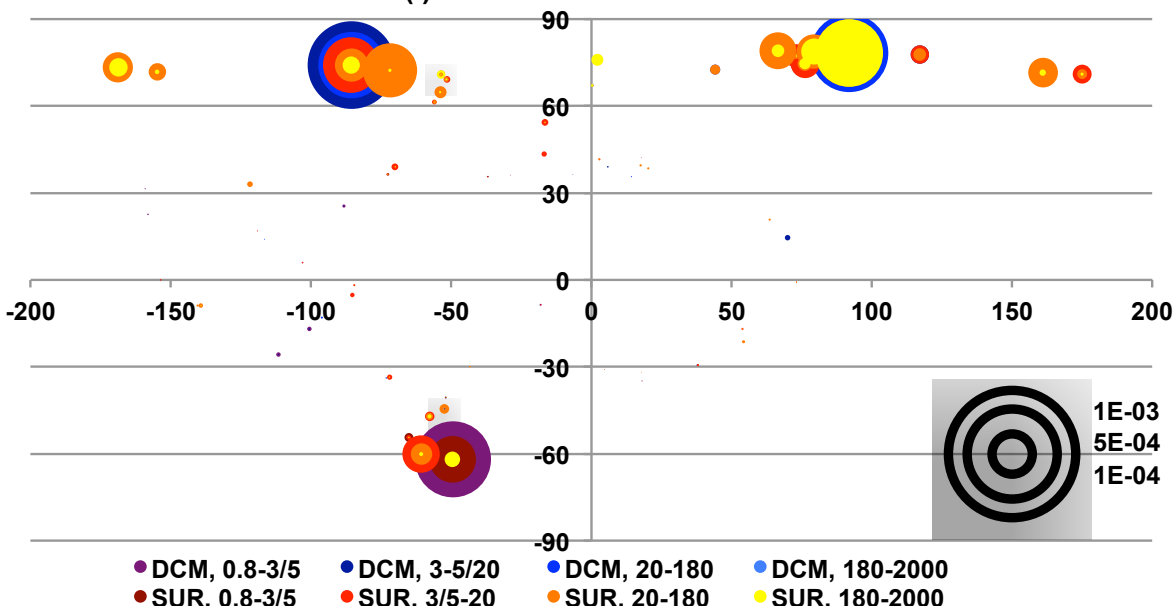

(ii) Total metaG abundance

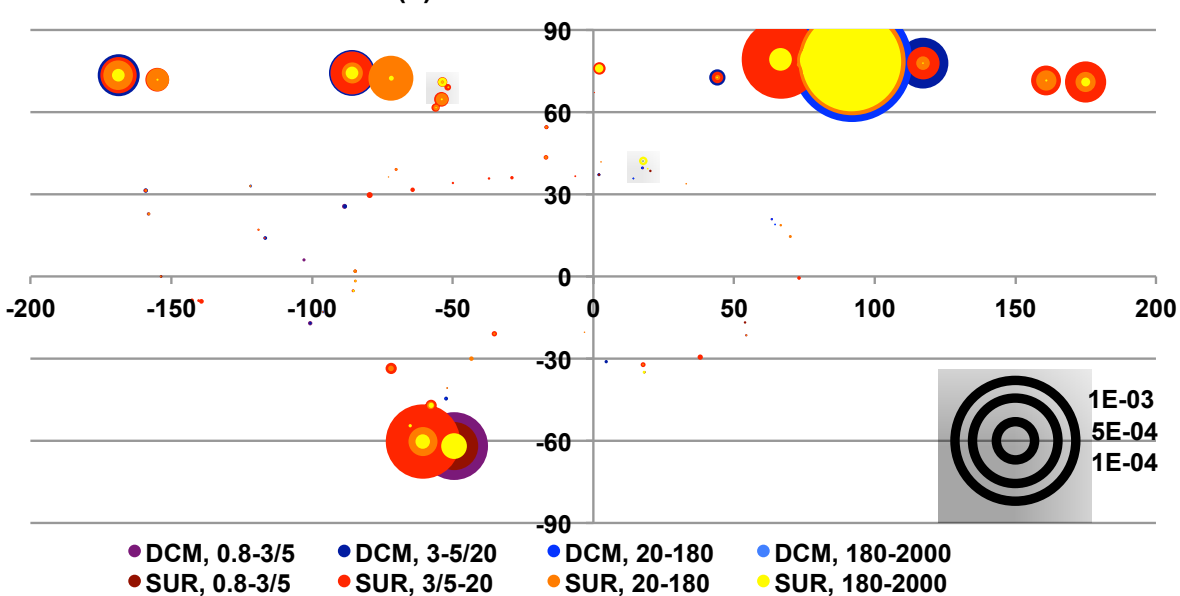

(i) metaT individual OTUs

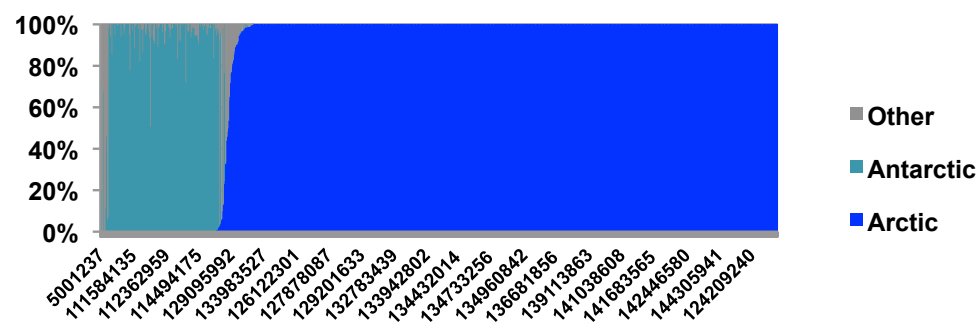

(ii) metaG individual OTUs

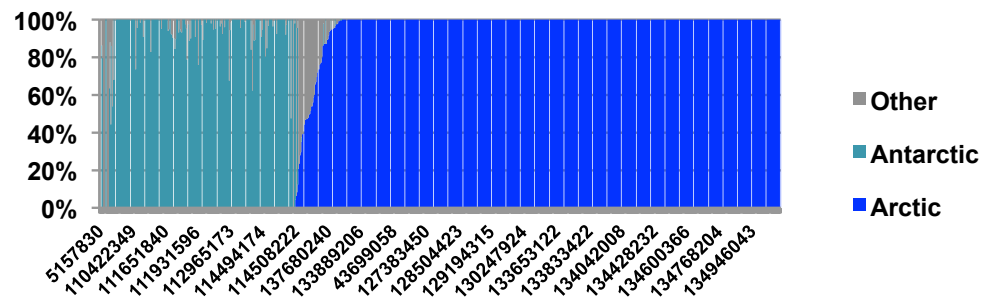

Biogeography  
Taxonomy

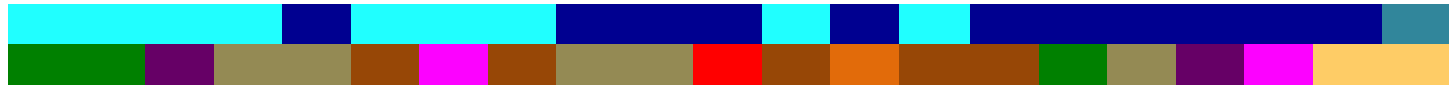

% Arctic

Biogeography  
Taxonomy

Chlamydomonas sp.  
Mantoniella antarctica  
Gemingera cryophila  
Polarella glacialis CCMP1383  
Polarella glacialis CCMP2088  
Thalassiosira sp.  
Phaeocystis antarctica  
Proboscia sp.  
Scrippsiella hangoei  
Peridinium aciculiferum  
Novel pelagophyte CCMP2097  
Eucampia antarctica  
CCMP2098  
Fragilariopsis sp.  
Entomoneis sp.  
Pyramimonas sp.  
Heterocapsa arctica  
Baffinella sp. CCMP2087  
Pavlovales sp. CCMP2293  
Ochromonas sp. CCMP2436  
Pedospumella encystans

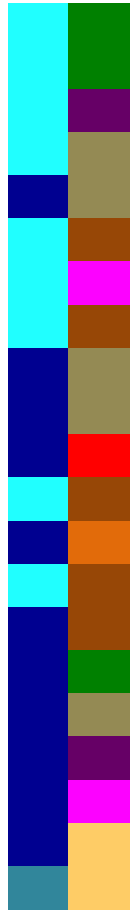

Key

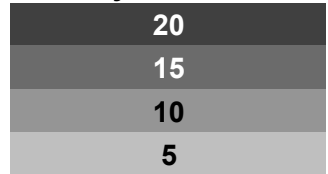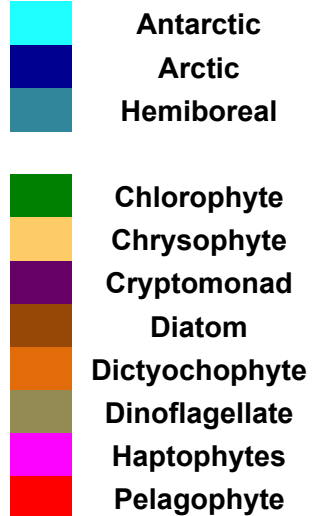

|                              |   |    |    |   |   |    |   |   |    |    |   |   |    |    |    |   |    |    |    |    |   |       |
|------------------------------|---|----|----|---|---|----|---|---|----|----|---|---|----|----|----|---|----|----|----|----|---|-------|
| Chlamydomonas sp.            | 0 | 0  | 6  | 0 | 0 | 0  | 0 | 0 | 0  | 0  | 0 | 0 | 0  | 0  | 0  | 0 | 0  | 0  | 0  | 0  | 0 | 0,0   |
| Mantoniella antarctica       | 0 | 0  | 27 | 1 | 0 | 0  | 0 | 0 | 0  | 0  | 0 | 0 | 0  | 0  | 0  | 0 | 1  | 0  | 0  | 0  | 0 | 3,4   |
| Gemingera cryophila          | 3 | 32 | 0  | 3 | 5 | 0  | 0 | 0 | 0  | 0  | 0 | 0 | 1  | 0  | 0  | 0 | 0  | 0  | 0  | 0  | 0 | 11,4  |
| Polarella glacialis CCMP1383 | 0 | 2  | 5  | 0 | 0 | 2  | 0 | 0 | 1  | 0  | 0 | 0 | 0  | 0  | 1  | 0 | 0  | 0  | 0  | 0  | 0 | 18,2  |
| Polarella glacialis CCMP2088 | 0 | 1  | 4  | 0 | 0 | 1  | 1 | 0 | 0  | 0  | 0 | 0 | 0  | 0  | 0  | 1 | 0  | 1  | 0  | 0  | 0 | 22,2  |
| Thalassiosira sp.            | 0 | 0  | 0  | 0 | 3 | 20 | 0 | 0 | 6  | 1  | 2 | 0 | 7  | 22 | 1  | 1 | 0  | 0  | 0  | 0  | 0 | 33,3  |
| Phaeocystis antarctica       | 0 | 0  | 0  | 0 | 2 | 0  | 0 | 1 | 1  | 0  | 0 | 0 | 8  | 0  | 0  | 0 | 0  | 2  | 0  | 0  | 0 | 35,7  |
| Proboscia sp.                | 0 | 0  | 0  | 0 | 0 | 0  | 2 | 0 | 0  | 0  | 0 | 0 | 5  | 0  | 0  | 0 | 0  | 4  | 0  | 0  | 0 | 36,4  |
| Scrippsiella hangoei         | 0 | 0  | 0  | 1 | 0 | 5  | 0 | 0 | 0  | 0  | 4 | 0 | 23 | 0  | 11 | 0 | 9  | 2  | 0  | 0  | 0 | 47,3  |
| Peridinium aciculiferum      | 0 | 0  | 0  | 0 | 0 | 1  | 0 | 0 | 0  | 0  | 2 | 0 | 18 | 1  | 2  | 0 | 7  | 12 | 0  | 0  | 0 | 55,8  |
| Novel pelagophyte CCMP2097   | 0 | 0  | 0  | 0 | 0 | 3  | 0 | 0 | 1  | 2  | 0 | 0 | 1  | 8  | 1  | 0 | 4  | 4  | 2  | 0  | 0 | 57,7  |
| Eucampia antarctica          | 0 | 0  | 0  | 0 | 0 | 0  | 2 | 0 | 0  | 0  | 0 | 0 | 0  | 0  | 0  | 1 | 0  | 2  | 0  | 0  | 0 | 60,0  |
| CCMP2098                     | 0 | 0  | 0  | 0 | 1 | 10 | 0 | 0 | 0  | 0  | 2 | 0 | 0  | 0  | 0  | 0 | 0  | 0  | 15 | 2  | 0 | 64,3  |
| Fragilariopsis sp.           | 0 | 0  | 0  | 0 | 0 | 25 | 5 | 1 | 16 | 17 | 8 | 0 | 0  | 0  | 0  | 0 | 13 | 0  | 0  | 0  | 0 | 63,5  |
| Entomoneis sp.               | 0 | 0  | 1  | 0 | 0 | 3  | 0 | 0 | 3  | 1  | 1 | 0 | 0  | 1  | 0  | 0 | 7  | 0  | 0  | 0  | 0 | 70,6  |
| Pyramimonas sp. CCMP2087     | 0 | 0  | 0  | 1 | 2 | 2  | 0 | 0 | 10 | 2  | 1 | 0 | 4  | 1  | 0  | 0 | 0  | 0  | 0  | 0  | 0 | 82,6  |
| Heterocapsa arctica          | 0 | 3  | 1  | 2 | 0 | 0  | 0 | 0 | 0  | 0  | 4 | 1 | 0  | 0  | 0  | 0 | 4  | 9  | 0  | 0  | 0 | 70,8  |
| Baffinella sp. CCMP2293      | 0 | 0  | 0  | 0 | 0 | 0  | 2 | 0 | 5  | 8  | 2 | 0 | 0  | 14 | 7  | 0 | 4  | 0  | 34 | 1  | 0 | 79,2  |
| Pavlovales sp. CCMP2436      | 0 | 3  | 2  | 0 | 1 | 0  | 0 | 0 | 6  | 15 | 1 | 0 | 0  | 2  | 0  | 1 | 15 | 32 | 0  | 3  | 0 | 91,4  |
| Ochromonas sp. CCMP2298      | 0 | 0  | 0  | 0 | 0 | 0  | 0 | 0 | 0  | 0  | 0 | 0 | 12 | 0  | 0  | 0 | 1  | 0  | 0  | 56 | 0 | 100,0 |
| Pedospumella encystans       | 0 | 0  | 0  | 0 | 0 | 0  | 0 | 0 | 0  | 0  | 0 | 0 | 1  | 0  | 0  | 0 | 0  | 0  | 36 | 0  | 0 | 100,0 |

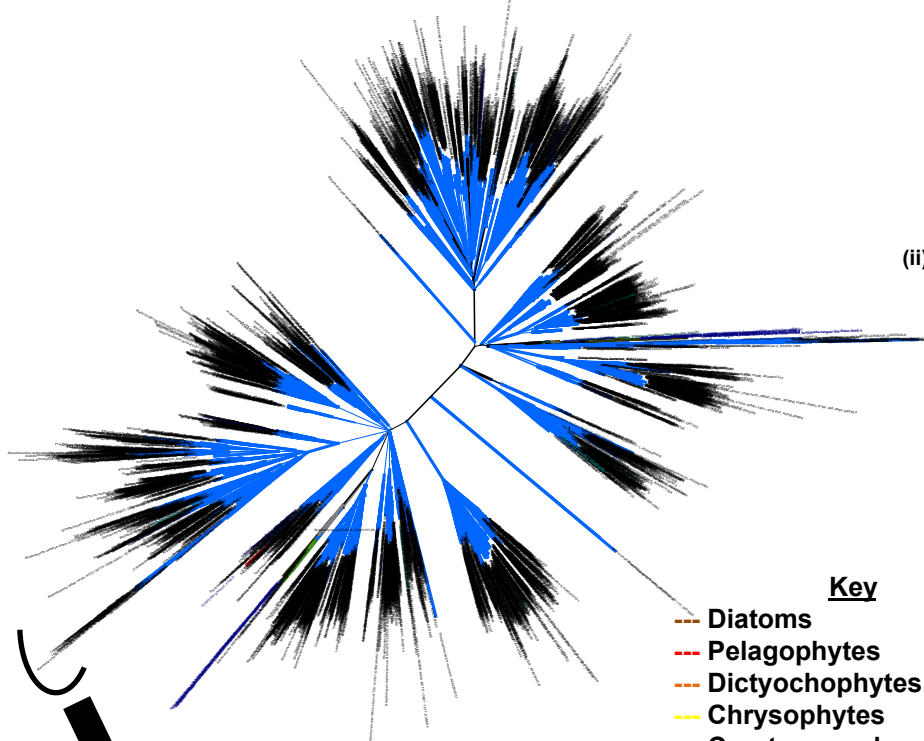

(ii) *Scrippsiella* and *Geminigera*

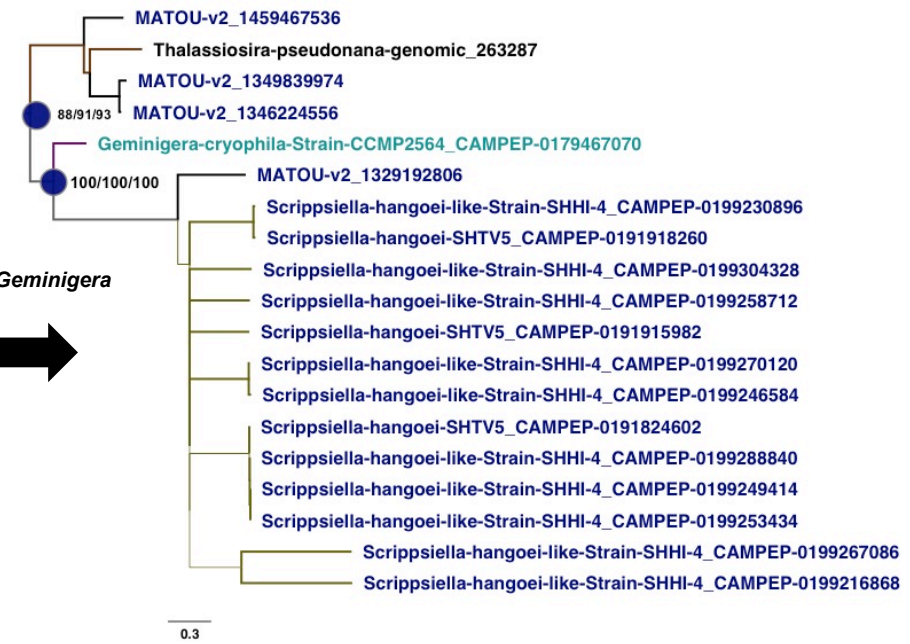

(i) *Scrippsiella* and CCMP2436

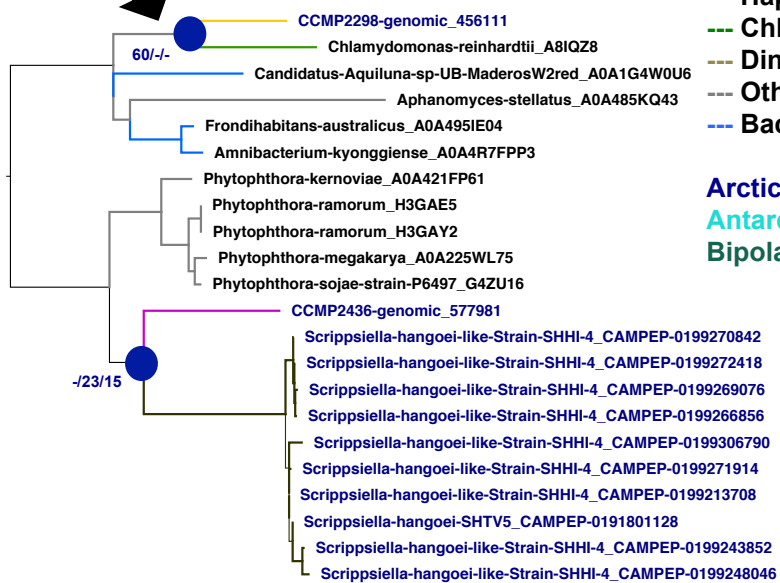

**Key**

- Diatoms
- Pelagophytes
- Dictyochophytes
- Chrysophytes
- Cryptomonads
- Haptophytes
- Chlorophytes
- Dinoflagellates
- Other eukaryotes
- Bacteria

Arctic native sequence  
 Antarctic native sequence  
 Bipolar Arctic/ Antarctic (TARA)



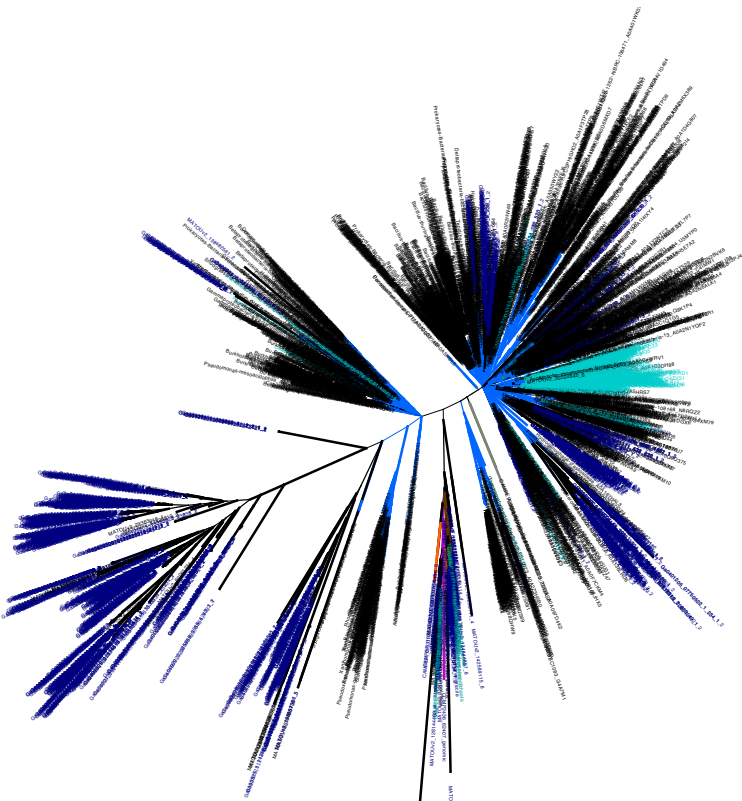

**Key**

- Diatoms
- Pelagophytes
- Dictyochophytes
- Chrysophytes
- Cryptomonads
- Haptophytes
- Chlorophytes
- Dinoflagellates
- Other eukaryotes
- Bacteria

Arctic native sequence

Antarctic native sequence

Bipolar Arctic/ Antarctic (TARA data only)

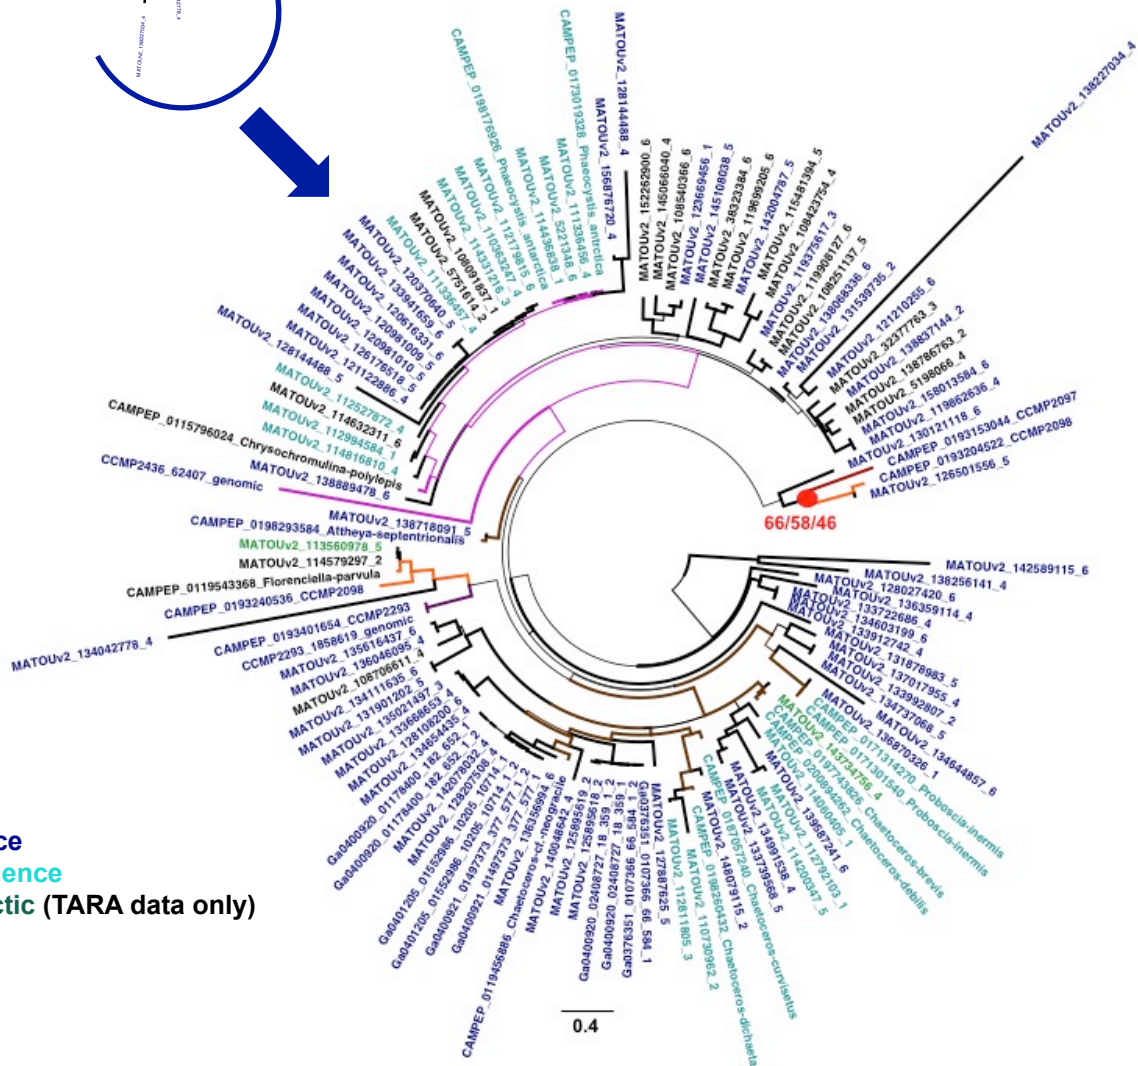

0.4

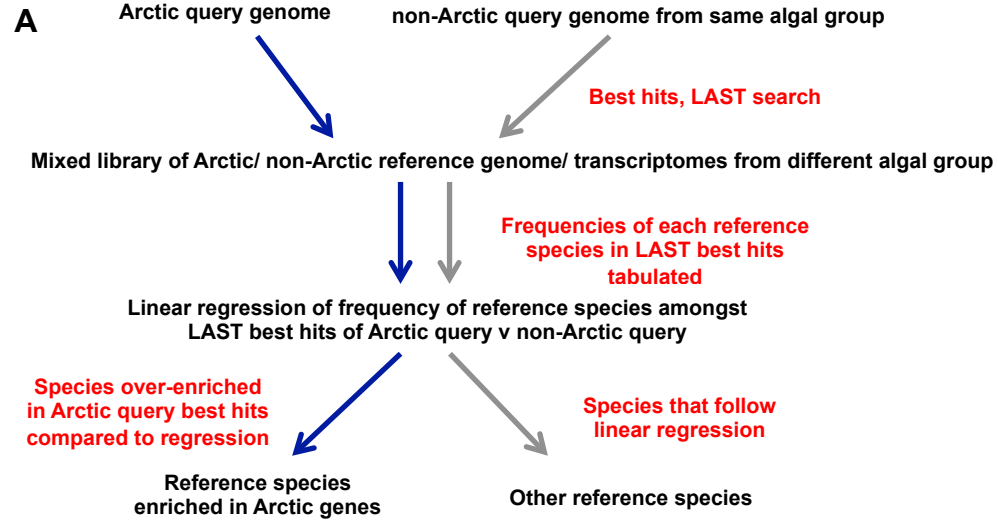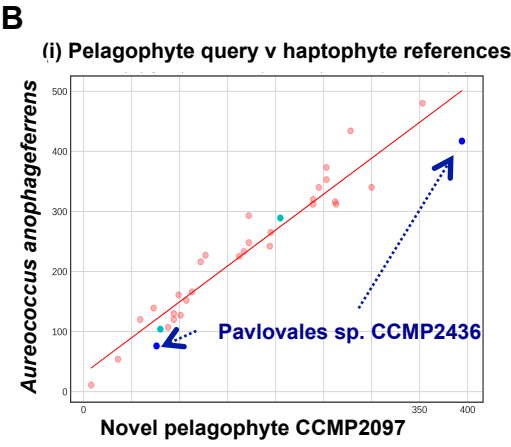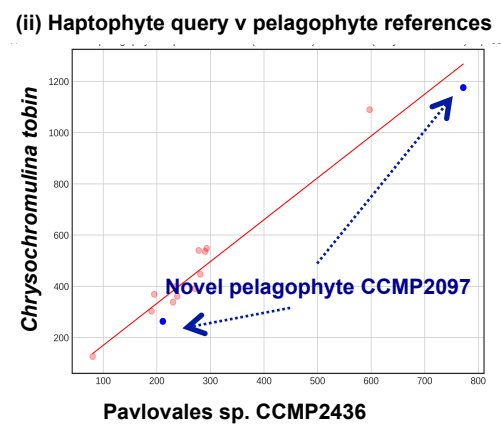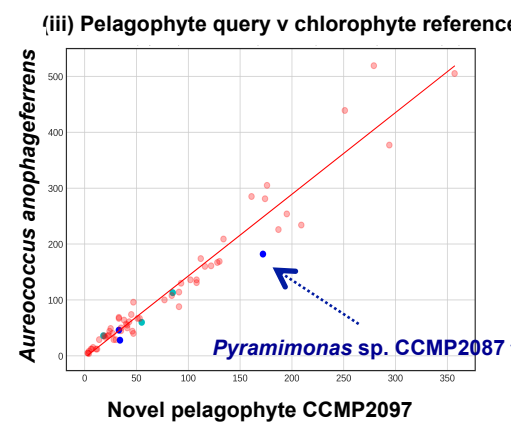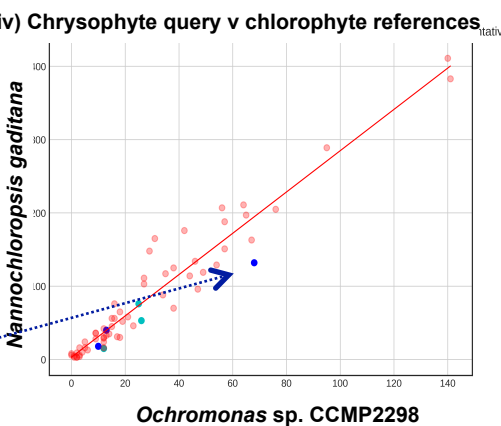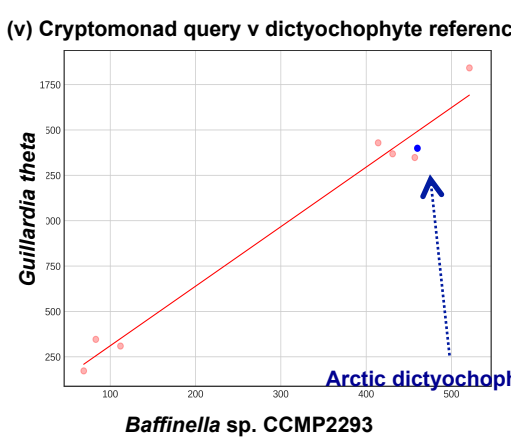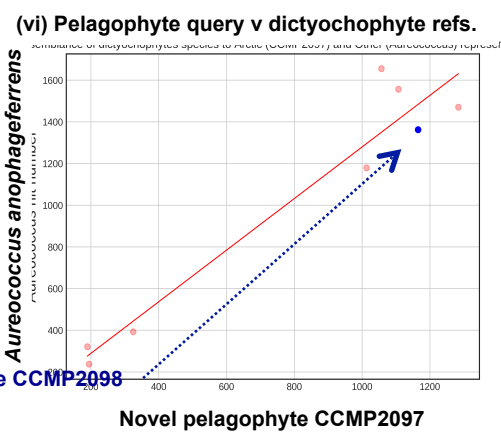

Arctic reference species/ Antarctic reference species/ Other reference species

Complete genomes for all four Arctic species

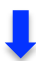

**CCMP2293: 33051 genes; CCMP2436: 26034 genes;  
CCMP2298: 20195 genes; CCMP2097: 19402 genes**

1) Genome filtration

Search by BLASTp against all tree of life (uniref, MMETSP, 1kp) excluding query sequence; perform reciprocal BLASTp best hit search against corresponding MMETSP transcriptome library of species.

Extract genes with (1) reciprocal BLAST best hit to MMETSP transcript *and* (2) presence on same scaffold as at least one gene with non-self BLAST best hit congruent with vertical inheritance (*Baffinella* sp. CCMP2293: cryptomonads; Pavlova sp. CCMP2436- haptophytes; CCMP2097 and *Ochromonas* sp. CCMP2298 - stramenopiles)

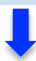

**CCMP2293: 8830 genes; CCMP2436: 11567 genes;  
CCMP2298: 3056 genes; CCMP2097: 10691 genes**

2) Within-  
algal search

Search genes using LAST against combined jgi genome and MMETSP transcriptome libraries for eight algal groups (chlorophytes, chrysophyte-related species, cryptomonads, diatoms, dictyochophytes, dinoflagellates, haptophytes, pelagophytes).

Extract genes with LAST best hit against at least one Arctic native algal species in one of the above searches

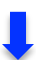

**CCMP2293: 245 genes; CCMP2436: 298 genes;  
CCMP2298: 220 genes; CCMP2097: 559 genes**

3) All-tree of life search

Perform LAST search and retrieve best hits for extracted genes for:

- All tree of life library, decomposed into 151 unique taxonomic categories, and annotated with habitat (Arctic, Antarctic, Other)
- All chlorophyte, chrysophyte, cryptomonad, diatom, dictyochophyte, dinoflagellate, haptophyte, pelagophyte libraries
- 85 further reference prokaryotic and eukaryotic genomes

Search query gene against pooled LAST best hits by BLASTp. Filter for:

- Genes receiving a best non-self hit to an Arctic or Antarctic native species
- Genes receiving a best non-self hit to a non-vertical taxonomic category (CCMP2293- not cryptomonads; CCMP2436- not haptophytes; CCMP2097- not pelagophytes; CCMP2298- not chrysophyte-related taxa)

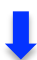

**CCMP2293: 43 genes; CCMP2436: 38 genes;  
CCMP2298: 36 genes; CCMP2097: 112 genes**

4) Merging

Search retained gene cluster query sequences against one another, and against full genome and transcriptome libraries for each query species by BLASTp.

Incorporate all sequences found to be better than the best non-self hit into each cluster. Merge clusters more closely related to one another, inferred by BLAST hit, to respective best non-Arctic, non-self hit

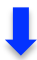

**215 merged gene clusters**

5) Alignment

Align merged sequence clusters with mafft, using automated settings. Manually remove poorly aligned or highly divergent branches, and build guide NJ tree. Eliminate any clusters from which query gene removed or found in NJ tree to have vertical origin (*Baffinella* sp. CCMP2293- non-polar cryptomonads; Pavlova sp. CCMP2436- non-polar haptophytes; CCMP2097- non-polar pelagophytes; *Ochromonas* sp. CCMP2298- non-polar chrysophytes)

Trim curated clusters with trimal using -gt 0.5 setting. Repeat mafft alignment, tree building, and manual editing

Trim curated clusters with trimal using resoverlap 0.75 -seqoverlap 0.8 setting. Repeat mafft alignment, tree building, and manual editing, removing partial query sequences as well.

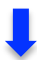

**129 finalised gene clusters**

6) Phylogeny

Pass finalised alignments through 300 replicate RAxML trees using PROTGAMMAJTT substitution model; extract best-scoring tree

Identify tree topologies with resolved Arctic-Arctic species pairs with RAxML bootstrap support > 50%

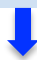

**21 gene trees showing specific within-Arctic HGT; 13 gene trees showing unresolved polar-specific clades**

### (i) Plastid alcohol dehydrogenase

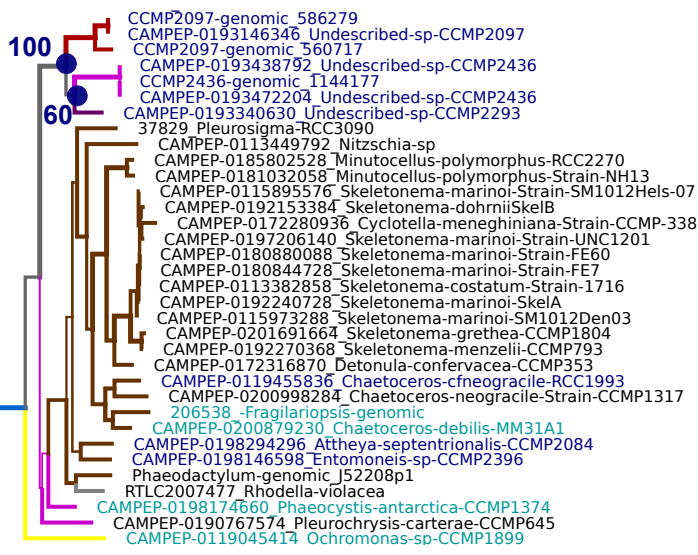

### (iv) Nuclear ATP-dependent RNA helicase pitchoune

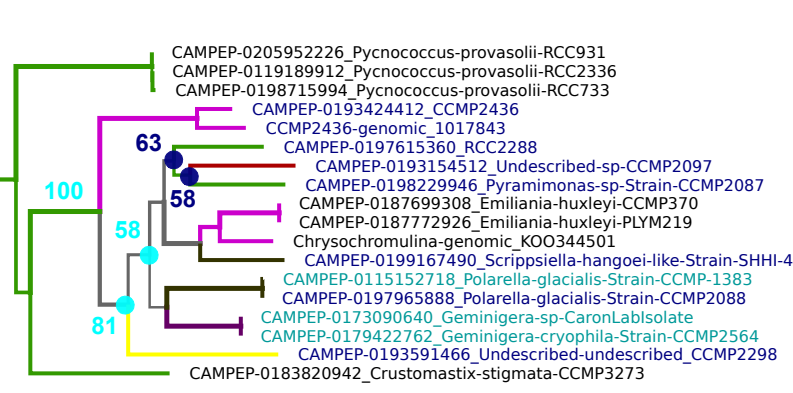

### (vi) Cytoplasmic DUF3638 protein

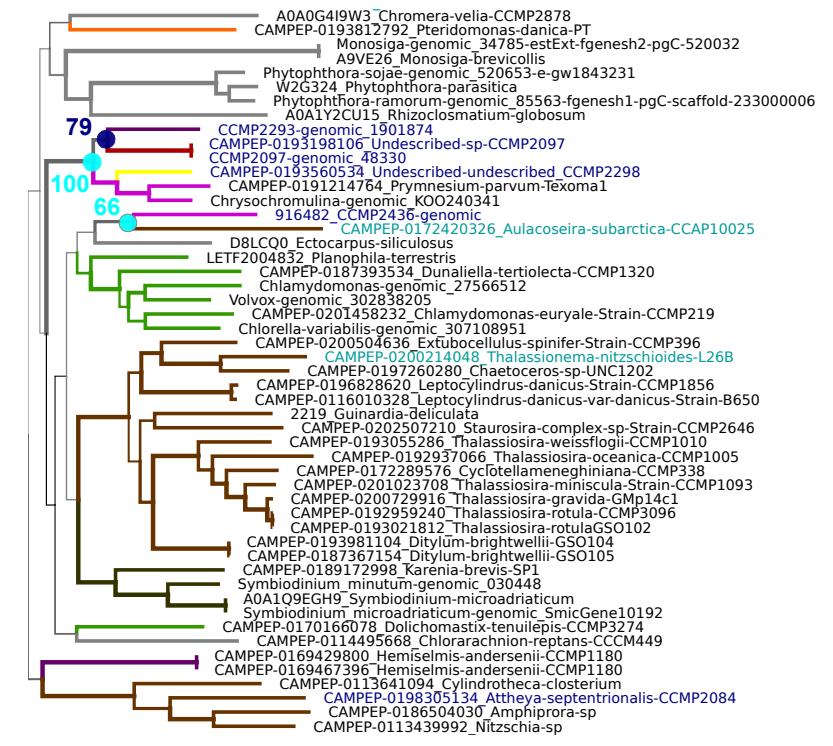

### (ii) Cytoplasmic fasciclin domain protein

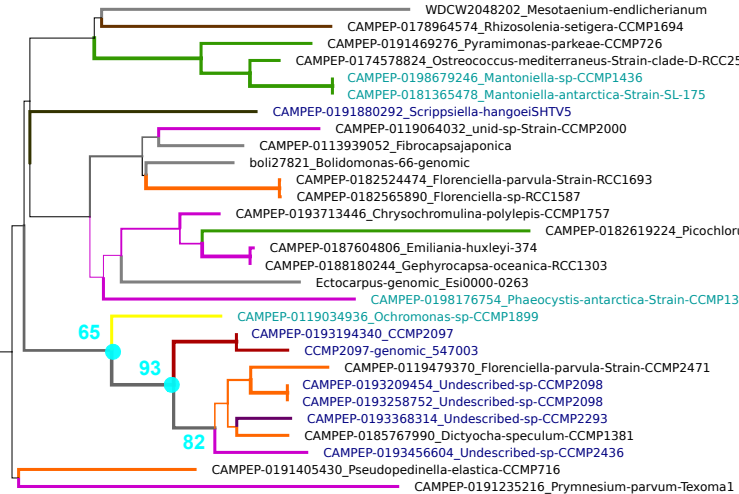

### (v) Plastid DUF861 protein

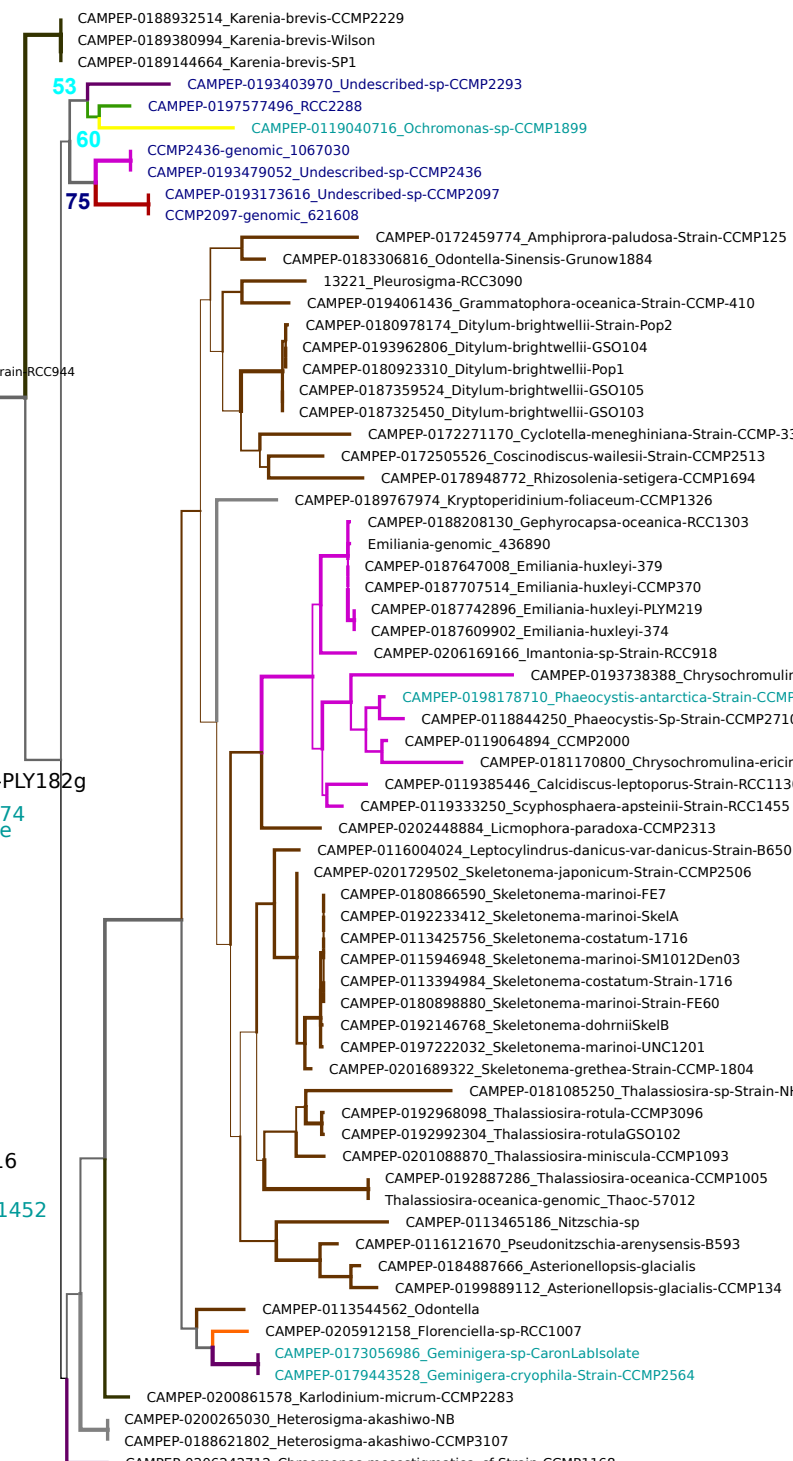

### (vii) Secreted aromatic ring hydrolase

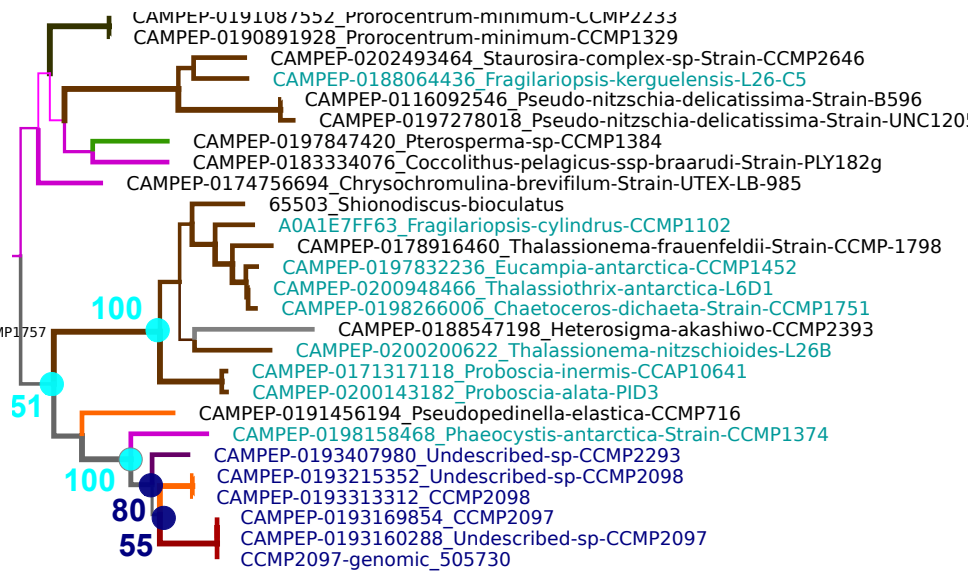

### (iii) Plastid CRAL/ TRI0 protein

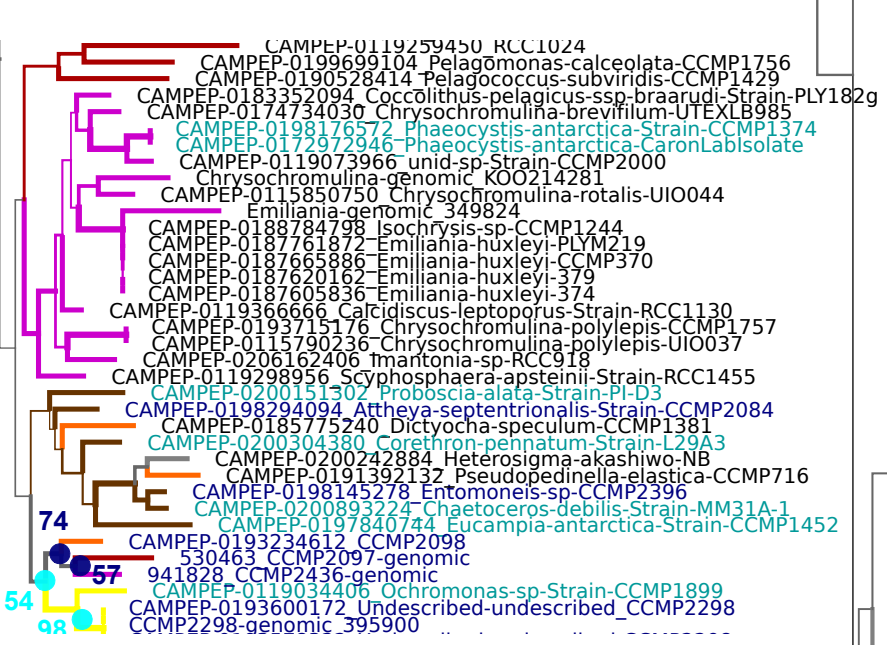

### (viii) Plastid pyrimidine 5' nucleotidase

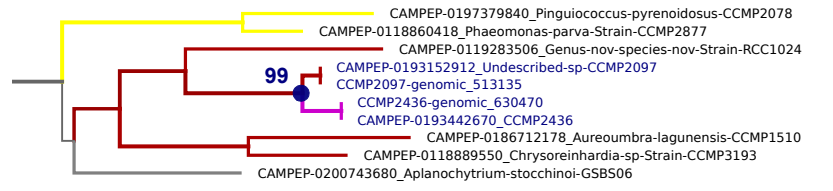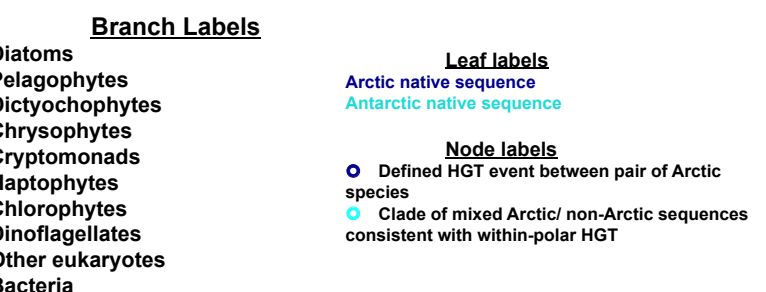

(i) Any secreted protein

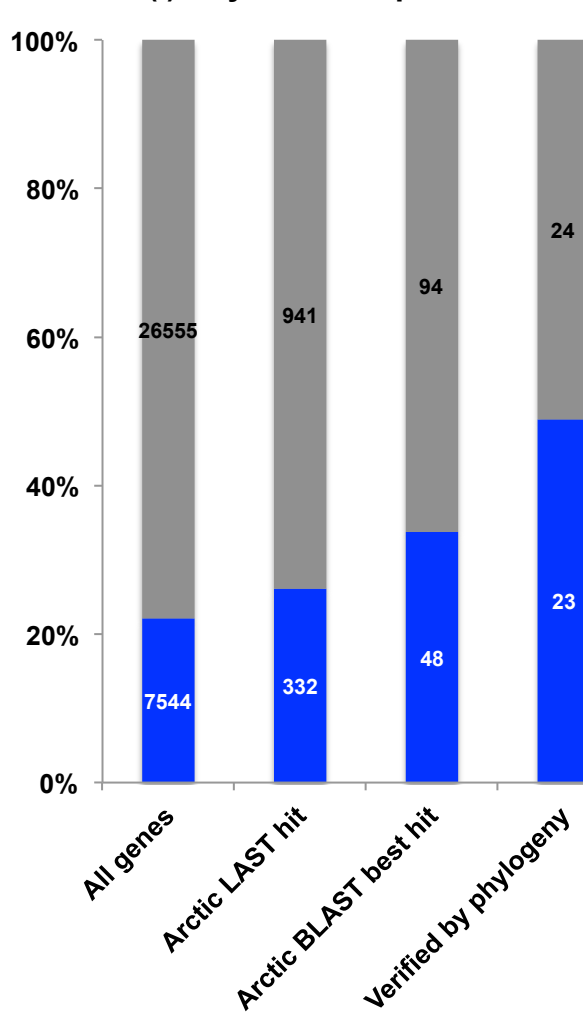

■ No secretory prediction  
 ■ Secretory prediction

(ii) ASAFind

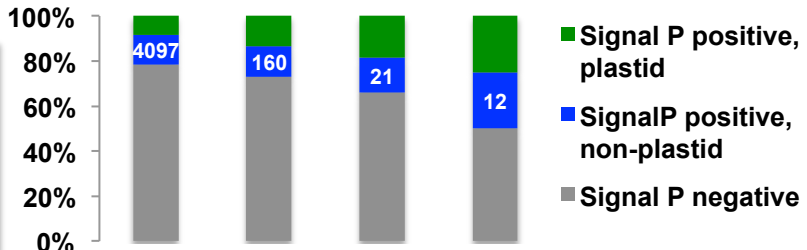

(iii) HECTAR

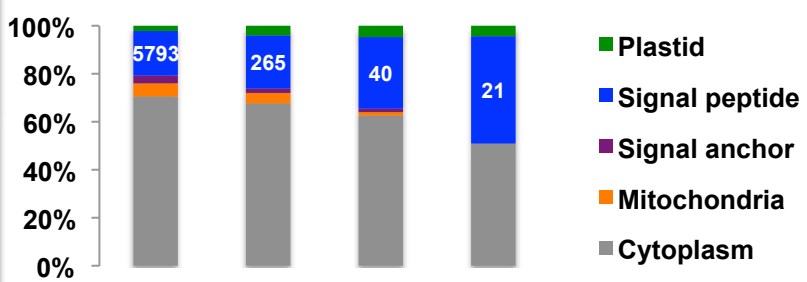

(iv) WolfPSort

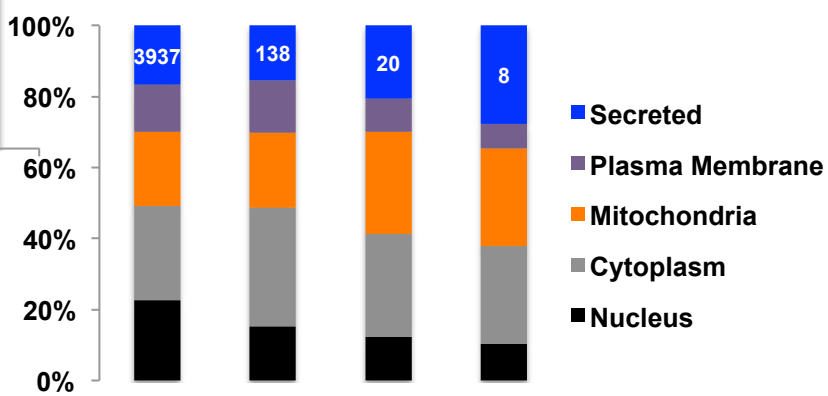

All  
 LAST hit  
 BLAST best hit  
 Phylogeny

(v) Any secreted protein- by species

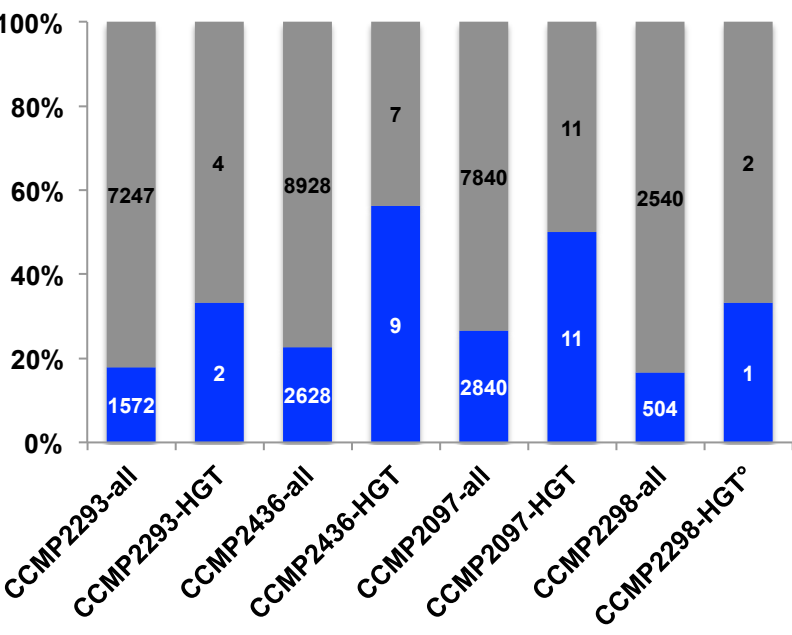

■ Secretory prediction  
 ■ No secretory prediction

(i) Cytoplasmic WD40 repeat protein  
(CCMP2097- 431954)

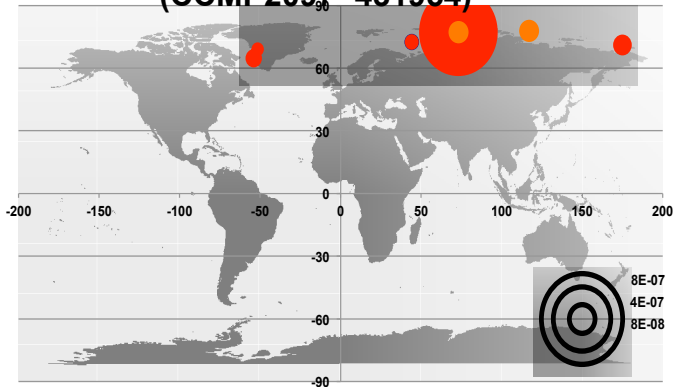

(ii)- Plastid pyrimidine 5' nucleotidase  
(CCMP2097-513135)

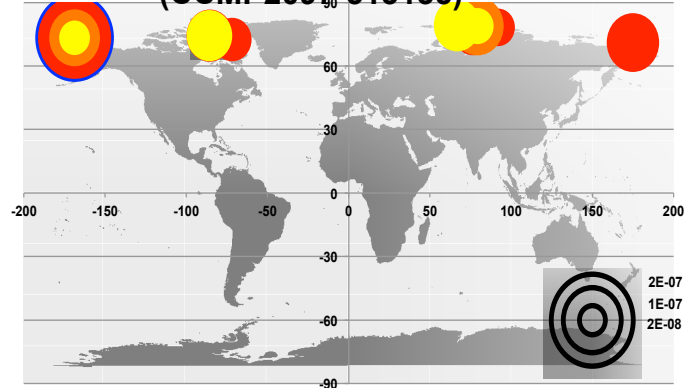

(iii)- Plastid CRAL/TRIO protein  
(CCMP2298- 395900)

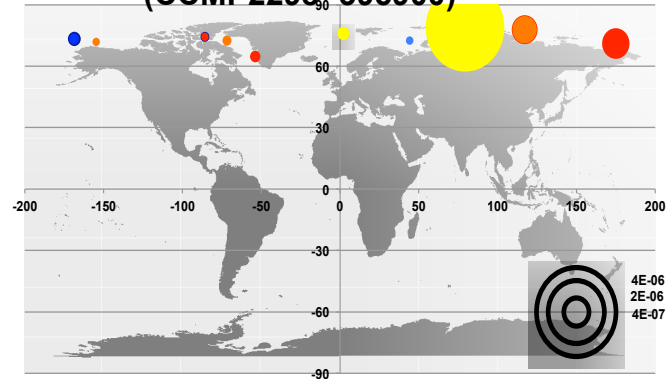

(iv)- Nuclear Mg<sup>2+</sup>/ cation channel  
(CCMP2436- 1143707)

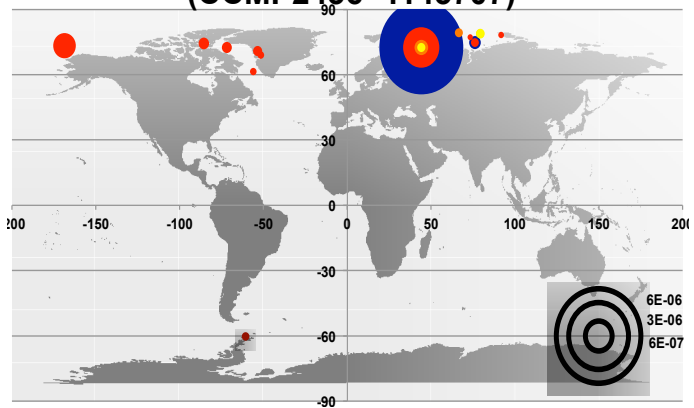

(v)- Plastid aminoglycoside phosphotransferase  
(CCMP2097- 184707)

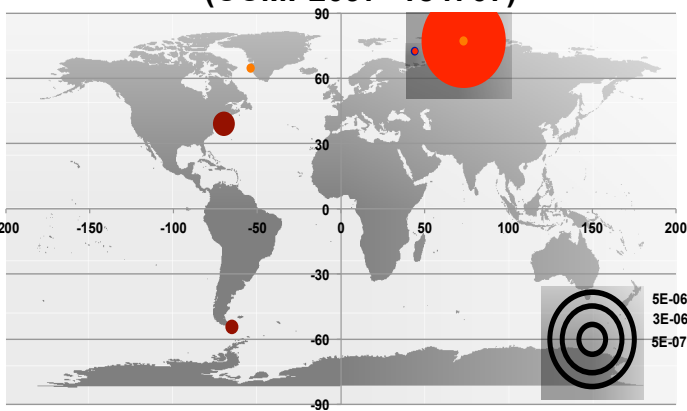

(vi)- Cytoplasmic fasciclin domain protein  
(CCMP2097- 547003)

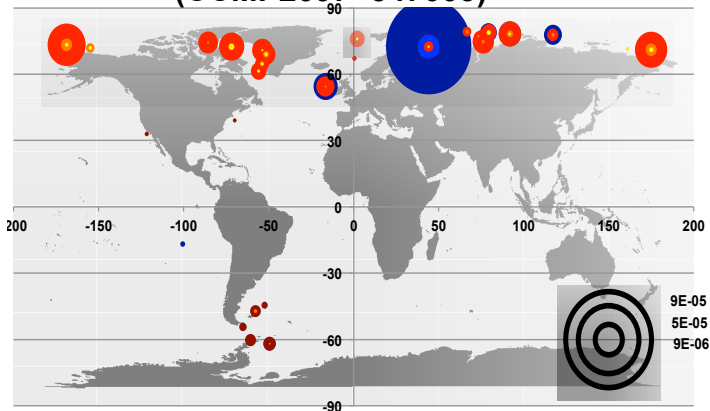

● DCM, 0.8-3/5 ● DCM, 3-5/20

● SUR, 0.8-3/5 ● SUR, 3/5-20

● DCM, 20-180 ● DCM, 180-2000

● SUR, 20-180 ● SUR, 180-2000

● DCM, 180-2000

● SUR, 180-2000
